# Supplementary material for: Novel parent-of-origin-specific differentially methylated loci on chromosome 16
Source: Clin Epigenetics. 2019 Apr 8;11:60. doi: 10.1186/s13148-019-0655-8 (PMC6454695; doi:10.1186/s13148-019-0655-8)
Supplement: Supplementary file 1 — Table S1. Overview of available genomic information for upd(16). Table S2. Differentially methylated regions identified in blood-based analysis (n = 1579), sorted by number of differentially methylated sites. Table S3. Differentially methylated regions identified in lung-based analysis (n = 8), sorted by number of differentially methylated sites contained. (XLSX 589 kb) [file 13148_2019_655_MOESM1_ESM.xlsx]

## Sheet: TS1_upd(16) overview
Supplementary Table S1: Overview of available genomic information for upd(16)
tissue	upd(16)	sample ID	hetero-/isodisomic state	regions of homozygosity, hg19 (based on CMA)	regions of homozygosity >5 MB, hg19 (based on variant calling from bisulfite sequencing data)	evidence of mosaic trisomy 16	evidence of placental trisomy 16
Blood	maternal	AC	pericentromeric heterodisomy with distal isodisomies from two cross-over events	16p13.3p13.13 (chr16:115,072-10,840,847)	16p13.3p13.13 (chr16:3,578,129-10,672,588)	CMA, karyotyping, and exome did not indicate trisomy 16	placenta was small, but no cytogenetics analysis was performed to confirm/exclude trisomy
				16q22.3q24.3 (chr16:73,421,051-90,115,921)	16q23.1q24.1 (chr16:77,966,438-84,662,205)
	maternal	2-0300	pericentromeric heterodisomy with distal isodisomies from two cross-over events	16p13.3p13.13 (chr16:26,671-10,515,335)	16p13.3p13.2 (chr16:2,871,121-10,347,790)	N/A	N/A
				16q21.1q24.1 (chr16:60,553,541-83,531,624)	16q23.1q24.1 (chr16:77,635,523-84,925,178)
	paternal	2-0204	suspected to be isodisomic for all of chromosome 16	N/A	16p13.3p13.12 (chr16:3,718,728-14,526,577)	N/A	N/A
					16p12.2p11.2 (chr16:22,723,946-28,343,070)
					16p11.2q22.1 (chr16:34,293,327-70,024,614)
					16q23.1q23.3 (chr16:74,477,517-82,309,273)
	paternal	2-0225	suspected to be isodisomic for all of chromosome 16	N/A	16p13.3p13.12 (chr16:1,436,671-12,657,151)	N/A	N/A
					16p12.2p11.2 (chr16:22,618,978-28,358,047)
					16p11.1q22.1 (chr16:34,607,359-69,984,343)
					16q23.1q24.1 (chr16:74,483,499-85,441,126)
Fibroblasts	maternal	BAB-8048	pericentromeric heterodisomy with distal isodisomy	distal regions on 16p and 16q	16p13.3 (chr16:1,017,060-6,869,312)	no trisomy detected in proband blood using FISH	confined placental mosaicism or trisomy 16 based on FISH of placental tissue
					16q23.1q24.3 (chr16:74,469,121-88,895,423)
	maternal	BAB-8047	pericentromeric heterodisomy with distal isodisomy	distal regions on 16p and 16q	N/A	N/A	N/A

## Sheet: TS2_DMRs, blood-based
Supplementary Table S2: Differentially methylated regions identified in blood-based analysis (n=1,579), sorted by number differentially methylated sites contained. One discordant methylation locus per DMR was allowed. Shading of percent methylation values ranges from low in purple, to high in yellow.
		peripheral blood samples, collapsed by sample category						individual samples
DMR	pos	matUPD.bl.percMeth	patUPD.bl.percMeth	control.bl.percMeth	matUPD.bl.coverage	patUPD.bl.coverage	control.bl.coverage	matUPD.bl1.percMeth	matUPD.bl2.percMeth	patUPD.bl1.percMeth	patUPD.bl2.percMeth	control.bl1.percMeth	control.bl2.percMeth	matUPD.fi.percMeth	acdmpv.lu1.percMeth	acdmpv.lu2.percMeth	control.lu.percMeth	matUPD.bl1.coverage	matUPD.bl2.coverage	patUPD.bl1.coverage	patUPD.bl2.coverage	control.bl1.coverage	control.bl2.coverage	matUPD.fi.coverage	acdmpv.lu1.coverage	acdmpv.lu2.coverage	control.lu.coverage
1	3493504	0	45.4545	18.1818	8	11	11	0	NA	66.6667	20	25	14.2857	0	33.3333	0	33.3333	8	NA	6	5	4	7	2	3	3	6
1	3493505	0	76.4706	47.8261	5	17	23	0	0	85.7143	70	50	46.6667	0	20	50	40	3	2	7	10	8	15	8	5	4	5
1	3493507	0	90.9091	27.2727	8	11	11	0	NA	83.3333	100	25	28.5714	0	66.6667	50	50	8	NA	6	5	4	7	2	3	2	6
1	3493508	0	100	90	5	17	20	0	0	100	100	85.7143	92.3077	0	60	50	80	3	2	6	11	7	13	9	5	4	5
1	3493514	0	63.1579	40	4	19	20	0	0	42.8571	75	57.1429	30.7692	11.1111	60	0	50	2	2	7	12	7	13	9	5	3	4
1	3493518	0	60	27.2727	10	10	11	0	NA	60	60	25	28.5714	0	33.3333	33.3333	40	10	NA	5	5	4	7	2	3	3	5
1	3493519	0	78.9474	75	5	19	20	0	0	71.4286	83.3333	83.3333	71.4286	0	60	66.6667	100	2	3	7	12	6	14	11	5	3	3
1	3493534	0	90.9091	25	10	11	8	0	NA	80	100	50	16.6667	0	50	0	50	10	NA	5	6	2	6	2	4	3	4
1	3493535	0	94.1176	70	10	17	20	0	0	100	88.8889	71.4286	69.2308	0	75	0	50	5	5	8	9	7	13	10	4	2	4
1	3493557	8.33333	69.2308	25	12	13	8	8.33333	NA	60	75	33.3333	20	0	25	20	20	12	NA	5	8	3	5	3	4	5	5
1	3493558	0	94.4444	47.8261	17	18	23	0	0	90	100	30	61.5385	0	66.6667	0	60	9	8	10	8	10	13	9	3	2	5
1	3493568	0	60	40	12	10	5	0	NA	33.3333	71.4286	50	33.3333	0	60	0	40	12	NA	3	7	2	3	3	5	5	5
1	3493569	0	88.2353	60	13	17	20	0	0	75	100	55.5556	63.6364	0	100	0	50	9	4	8	9	9	11	9	3	2	4
1	3493614	0	50	33.3333	12	10	6	0	NA	50	50	50	25	0	66.6667	0	25	12	NA	4	6	2	4	5	6	4	4
1	3493615	0	61.9048	29.6296	26	21	27	0	0	40	81.8182	38.4615	21.4286	7.69231	80	40	0	18	8	10	11	13	14	13	5	5	2
1	3493641	0	71.4286	50	6	7	2	0	NA	66.6667	75	0	100	0	50	0	100	6	NA	3	4	1	1	3	4	1	1
1	3493642	0	95.2381	44	25	21	25	0	0	90.9091	100	41.6667	46.1538	0	83.3333	40	40	16	9	11	10	12	13	13	6	5	5
1	3493681	0	90	60	6	10	5	0	0	100	83.3333	33.3333	100	0	33.3333	0	100	3	3	4	6	3	2	7	3	1	2
1	3493682	0	100	47.8261	22	12	23	0	0	100	100	55.5556	42.8571	0	60	33.3333	33.3333	16	6	7	5	9	14	16	5	3	6
1	3493687	0	91.6667	57.1429	7	12	7	0	0	83.3333	100	40	100	0	50	0	100	3	4	6	6	5	2	9	4	1	2
1	3493688	0	100	28.5714	22	10	21	0	0	100	100	37.5	23.0769	0	50	33.3333	33.3333	16	6	5	5	8	13	16	4	3	6
1	3493693	0	100	62.5	8	13	8	0	0	100	100	40	100	0	60	50	100	4	4	7	6	5	3	9	5	4	2
1	3493694	0	88.8889	33.3333	22	9	21	0	0	75	100	25	38.4615	0	50	33.3333	33.3333	16	6	4	5	8	13	15	4	3	6
1	3493705	0	85.7143	45.4545	8	14	11	0	0	100	66.6667	33.3333	60	0	33.3333	50	100	4	4	8	6	6	5	12	6	4	2
1	3493706	0	100	31.5789	19	7	19	0	0	100	100	42.8571	25	0	50	50	33.3333	14	5	4	3	7	12	15	4	2	6
1	3493714	0	85.7143	54.5455	9	14	11	0	0	100	66.6667	33.3333	80	0	57.1429	50	100	4	5	8	6	6	5	13	7	4	2
1	3493715	0	100	41.1765	17	7	17	0	0	100	100	50	36.3636	0	33.3333	50	33.3333	13	4	3	4	6	11	15	3	2	6
1	3493763	0	86.3636	44.4444	12	22	18	0	0	100	72.7273	55.5556	33.3333	0	66.6667	55.5556	100	7	5	11	11	9	9	15	6	9	3
1	3493764	0	100	55.5556	4	8	9	0	0	100	100	100	33.3333	0	0	NA	0	3	1	4	4	3	6	5	4	NA	4
1	3493774	0	100	50	14	23	18	0	0	100	100	55.5556	44.4444	0	57.1429	55.5556	75	9	5	11	12	9	9	15	7	9	4
1	3493775	0	100	62.5	1	8	8	0	NA	100	100	75	50	0	25	0	0	1	NA	4	4	4	4	4	4	1	2
1	3493808	0	100	38.8889	16	24	18	0	0	100	100	40	37.5	0	75	62.5	66.6667	11	5	12	12	10	8	15	8	8	6
1	3493809	0	100	66.6667	3	10	12	0	NA	100	100	80	57.1429	0	60	0	0	3	NA	4	6	5	7	3	5	1	4
1	3493815	0	96.1538	33.3333	17	26	18	0	0	91.6667	100	30	37.5	0	42.8571	33.3333	40	11	6	12	14	10	8	15	7	6	5
1	3493816	0	75	58.3333	2	12	12	0	NA	100	62.5	60	57.1429	0	33.3333	50	20	2	NA	4	8	5	7	3	6	2	5
1	3493826	0	76.9231	42.1053	16	26	19	0	0	66.6667	85.7143	36.3636	50	0	62.5	42.8571	40	10	6	12	14	11	8	14	8	7	5
1	3493827	0	88.2353	53.8462	4	17	13	0	NA	80	91.6667	50	57.1429	0	40	0	0	4	NA	5	12	6	7	2	10	4	5
1	3493845	0	100	50	12	20	20	0	0	100	100	53.8462	42.8571	0	60	33.3333	60	9	3	7	13	13	7	11	5	9	5
1	3493846	0	100	64.7059	4	18	17	0	NA	100	100	71.4286	60	0	60	60	28.5714	4	NA	5	13	7	10	2	10	5	7
1	3493876	0	100	50	7	17	14	0	0	100	100	50	50	0	20	42.8571	50	5	2	6	11	12	2	6	5	7	4
1	3493877	0	94.4444	57.1429	6	18	14	0	0	100	91.6667	60	55.5556	0	36.3636	60	50	5	1	6	12	5	9	3	11	5	6
1	3493907	0	93.3333	46.1538	7	15	13	0	NA	100	90	45.4545	50	0	16.6667	42.8571	57.1429	7	NA	5	10	11	2	3	6	7	7
1	3493908	0	95	61.5385	6	20	13	0	0	100	90.9091	40	75	0	63.6364	75	80	5	1	9	11	5	8	3	11	4	5
1	3493915	0	85.7143	38.4615	7	14	13	0	NA	100	71.4286	44.4444	25	0	16.6667	42.8571	66.6667	7	NA	7	7	9	4	3	6	7	9
1	3493916	0	100	66.6667	5	20	12	0	0	100	100	40	85.7143	0	70	100	85.7143	4	1	11	9	5	7	4	10	3	7
1	3493955	0	80.9524	58.8235	13	21	17	0	NA	77.7778	83.3333	54.5455	66.6667	0	50	44.4444	44.4444	13	NA	9	12	11	6	8	10	9	9
1	3493956	0	96.2963	72.2222	6	27	18	0	0	100	90.9091	40	84.6154	0	41.6667	57.1429	81.8182	5	1	16	11	5	13	4	12	7	11
1	3493968	0	81.8182	52.6316	14	22	19	0	0	100	71.4286	40	66.6667	0	41.6667	44.4444	50	13	1	8	14	10	9	6	12	9	10
1	3493969	0	96.1538	71.4286	7	26	21	0	0	100	90	66.6667	73.3333	0	53.8462	44.4444	80	6	1	16	10	6	15	4	13	9	10
1	3493997	0	95.4545	48.1481	14	22	27	0	0	100	91.6667	53.8462	42.8571	0	40	45.4545	40	13	1	10	12	13	14	9	15	11	10
1	3493998	0	96.7742	51.6129	10	31	31	0	0	94.4444	100	60	47.619	0	45.4545	50	75	9	1	18	13	10	21	9	11	10	12
1	3494006	0	87.5	44.8276	14	24	29	0	0	90.9091	84.6154	50	40	0	33.3333	30	36.3636	13	1	11	13	14	15	9	15	10	11
1	3494007	0	87.8788	50	13	33	32	0	NA	88.2353	87.5	36.3636	57.1429	0	30	44.4444	42.8571	13	NA	17	16	11	21	9	10	9	14
1	3494015	0	82.1429	46.6667	15	28	30	0	0	85.7143	78.5714	40	53.3333	0	43.75	50	36.3636	14	1	14	14	15	15	9	16	10	11
1	3494016	0	82.8571	65.625	14	35	32	0	NA	84.2105	81.25	63.6364	66.6667	0	54.5455	45.4545	66.6667	14	NA	19	16	11	21	10	11	11	15
1	3494066	0	96.1538	43.3333	17	26	30	0	0	100	91.6667	45.4545	42.1053	0	47.0588	25	36.3636	14	3	14	12	11	19	9	17	8	11
1	3494067	4.34783	97.3684	57.4468	23	38	47	0	25	95.2381	100	47.619	65.3846	0	21.4286	50	62.5	19	4	21	17	21	26	17	14	12	24
1	3494077	0	92.3077	42.8571	11	26	28	0	0	100	84.6154	44.4444	42.1053	0	31.25	37.5	27.2727	8	3	13	13	9	19	11	16	8	11
1	3494078	0	97.0588	51.9231	27	34	52	0	0	94.7368	100	50	53.3333	5.55556	31.25	36.3636	56.5217	22	5	19	15	22	30	18	16	11	23
1	3494094	0	90.9091	33.3333	15	22	30	0	0	100	81.8182	33.3333	33.3333	10	35.7143	33.3333	30	11	4	11	11	9	21	10	14	9	10
1	3494095	0	97.2222	55.5556	28	36	54	0	0	95	100	58.3333	53.3333	0	29.4118	50	61.9048	23	5	20	16	24	30	16	17	10	21
1	3494128	0	52.6316	4.16667	19	19	24	0	0	50	55.5556	0	5.26316	0	9.09091	0	8.33333	15	4	10	9	5	19	12	11	4	12
1	3494129	0	44.8276	26.087	28	29	46	0	0	55.5556	27.2727	33.3333	20	0	6.25	33.3333	23.5294	23	5	18	11	21	25	20	16	9	17
1	3494130	0	89.4737	20.8333	19	19	24	0	0	80	100	20	21.0526	0	36.3636	50	25	15	4	10	9	5	19	11	11	4	12
1	3494131	0	57.1429	47.8261	28	28	46	0	0	61.1111	50	52.381	44	0	18.75	44.4444	29.4118	23	5	18	10	21	25	20	16	9	17
1	3494152	0	85.7143	17.3913	22	14	23	0	0	85.7143	85.7143	0	23.5294	0	30	16.6667	28.5714	18	4	7	7	6	17	12	10	6	14
1	3494153	0	85.1852	31.5789	27	27	38	0	0	81.25	90.9091	42.1053	21.0526	0	21.4286	37.5	33.3333	22	5	16	11	19	19	16	14	8	15
1	3494155	0	100	18.1818	23	14	22	0	0	100	100	0	25	9.09091	20	28.5714	21.4286	18	5	6	8	6	16	11	10	7	14
1	3494156	0	92.5926	51.3514	25	27	37	0	0	93.75	90.9091	52.6316	50	0	23.0769	50	40	20	5	16	11	19	18	15	13	8	15
1	3494162	0	75	20.8333	21	12	24	0	0	66.6667	83.3333	25	18.75	0	22.2222	14.2857	28.5714	17	4	6	6	8	16	11	9	7	14
1	3494163	0	75	19.4444	24	28	36	0	0	68.75	83.3333	22.2222	16.6667	0	15.3846	50	21.4286	19	5	16	12	18	18	16	13	8	14
1	3494169	0	100	26.9231	21	14	26	0	0	100	100	30	25	0	12.5	28.5714	40	17	4	8	6	10	16	11	8	7	15
1	3494170	0	88	50	21	25	34	0	0	93.3333	80	47.0588	52.9412	0	23.0769	83.3333	42.8571	16	5	15	10	17	17	14	13	6	14
1	3494175	0	92.8571	18.5185	20	14	27	0	0	100	80	18.1818	18.75	0	12.5	16.6667	35.7143	16	4	9	5	11	16	11	8	6	14
1	3494176	0	90.9091	53.5714	18	22	28	0	0	92.8571	87.5	46.1538	60	8.33333	25	66.6667	35.7143	14	4	14	8	13	15	12	12	6	14
1	3494462	45.6522	96.4286	72.973	46	28	37	43.4783	47.8261	94.4444	100	85	58.8235	46.1538	77.2727	70	55	23	23	18	10	20	17	13	22	20	20
1	3494463	28.5714	91.6667	40	7	12	10	33.3333	0	100	80	50	25	66.6667	100	100	100	6	1	7	5	6	4	6	3	2	8
2	3481802	97.3684	47.3684	64.8649	38	38	37	100	87.5	31.25	59.0909	82.3529	50	100	50	66.6667	45	30	8	16	22	17	20	14	16	3	20
2	3481819	100	20.6897	66.6667	16	29	24	100	100	7.69231	31.25	75	58.3333	100	53.8462	66.6667	57.1429	15	1	13	16	12	12	14	13	12	14
2	3481820	97.5	25	52.5	40	40	40	96.7742	100	23.5294	26.087	57.8947	47.619	100	44.4444	25	40	31	9	17	23	19	21	14	18	4	20
2	3481833	94.7368	29.4118	65.3846	19	34	26	94.4444	100	16.6667	43.75	66.6667	64.2857	100	78.5714	75	64.2857	18	1	18	16	12	14	15	14	12	14
2	3481834	100	38.4615	60.9756	42	39	41	100	100	25	47.8261	63.1579	59.0909	100	57.8947	40	60	34	8	16	23	19	22	13	19	5	20
2	3481889	95.4545	11.4286	63.3333	22	35	30	94.4444	100	15.7895	6.25	50	72.2222	93.75	58.8235	75	75	18	4	19	16	12	18	16	17	8	20
2	3481890	96.6667	10.2564	40.8163	30	39	49	100	80	6.25	13.0435	42.1053	40	90.9091	52.9412	28.5714	38.8889	25	5	16	23	19	30	11	17	7	18
2	3481920	88	10.8108	64.7059	25	37	34	85.7143	100	15	5.88235	50	81.25	95	64.7059	62.5	63.1579	21	4	20	17	18	16	20	17	8	19
2	3481921	96.4286	13.8889	37.5	28	36	48	95.6522	100	0	20.8333	44.4444	33.3333	90	61.5385	12.5	44.4444	23	5	12	24	18	30	10	13	8	18
2	3481926	96	13.5135	65.7143	25	37	35	95.2381	100	15	11.7647	57.8947	75	100	58.8235	75	65	21	4	20	17	19	16	19	17	8	20
2	3481927	100	3.44828	43.1818	26	29	44	100	100	0	5.26316	52.9412	37.037	100	54.5455	11.1111	26.6667	22	4	10	19	17	27	10	11	9	15
2	3481932	92.3077	12.5	66.6667	26	32	36	95.4545	75	12.5	12.5	63.1579	70.5882	100	56.25	55.5556	66.6667	22	4	16	16	19	17	17	16	9	21
2	3481933	100	4	44.186	26	25	43	100	100	0	5.55556	52.9412	38.4615	100	63.6364	0	42.8571	22	4	7	18	17	26	10	11	10	14
2	3481938	96.1538	20.5882	65.7895	26	34	38	95.4545	100	22.2222	18.75	65	66.6667	94.4444	57.8947	60	60	22	4	18	16	20	18	18	19	10	20
2	3481939	100	3.7037	50	24	27	38	100	100	0	5	62.5	40.9091	100	58.3333	27.2727	35.7143	20	4	7	20	16	22	8	12	11	14
2	3481945	100	17.6471	68.4211	24	34	38	100	100	16.6667	18.75	65	72.2222	100	61.1111	66.6667	65	20	4	18	16	20	18	17	18	12	20
2	3481946	95.8333	7.40741	48.5714	24	27	35	95	100	0	10	64.2857	38.0952	100	57.1429	41.6667	43.75	20	4	7	20	14	21	8	14	12	16
2	3481956	100	19.3548	64.8649	24	31	37	100	100	20	18.75	63.1579	66.6667	100	58.8235	54.5455	55.5556	21	3	15	16	19	18	18	17	11	18
2	3481957	95.6522	3.84615	51.5152	23	26	33	95	100	0	5.55556	68.75	35.2941	91.6667	66.6667	54.5455	53.3333	20	3	8	18	16	17	12	12	11	15
2	3481961	100	22.5806	60	22	31	35	100	100	23.0769	22.2222	64.7059	55.5556	100	56.25	50	64.7059	19	3	13	18	17	18	17	16	10	17
2	3481962	100	0	53.3333	21	24	30	100	100	0	0	76.9231	35.2941	100	58.3333	53.8462	50	18	3	7	17	13	17	13	12	13	14
2	3481970	100	19.3548	47.3684	24	31	38	100	100	18.1818	20	52.381	41.1765	93.3333	47.3684	45.4545	61.5385	20	4	11	20	21	17	15	19	11	13
2	3481971	95.2381	3.84615	48.3871	21	26	31	94.4444	100	0	5.55556	75	31.5789	100	69.2308	61.5385	35.7143	18	3	8	18	12	19	16	13	13	14
2	3481989	95.4545	2.94118	51.3514	22	34	37	100	66.6667	6.66667	0	50	52.6316	100	45	60	58.3333	19	3	15	19	18	19	14	20	10	12
2	3481990	95	3.7037	45.4545	20	27	33	93.3333	100	0	5.88235	72.7273	31.8182	93.75	83.3333	69.2308	40	15	5	10	17	11	22	16	12	13	15
2	3481997	95.2381	8.82353	44.1176	21	34	34	94.1176	100	5.55556	12.5	44.4444	43.75	92.3077	45.4545	66.6667	72.7273	17	4	18	16	18	16	13	22	9	11
2	3481998	100	3.7037	50	24	27	30	100	100	0	5.88235	70	40	93.75	83.3333	72.7273	41.1765	16	8	10	17	10	20	16	12	11	17
2	3482009	100	5.88235	37.5	21	34	32	100	100	0	11.7647	40	35.2941	92.3077	54.5455	50	86.6667	18	3	17	17	15	17	13	22	10	15
2	3482010	90.9091	3.44828	50	22	29	32	100	75	0	6.25	60	45.4545	100	100	75	43.75	14	8	13	16	10	22	16	14	12	16
2	3482021	95	20	43.75	20	35	32	94.1176	100	12.5	26.3158	41.1765	46.6667	92.3077	63.6364	53.8462	78.5714	17	3	16	19	17	15	13	22	13	14
2	3482022	95.6522	3.7037	56.6667	23	27	30	100	87.5	0	7.69231	72.7273	47.3684	94.1176	91.6667	76.9231	46.6667	15	8	14	13	11	19	17	12	13	15
2	3482029	100	2.94118	44.1176	21	34	34	100	100	0	5.26316	47.3684	40	90.9091	41.6667	35.7143	61.5385	17	4	15	19	19	15	11	24	14	13
2	3482030	95.8333	3.84615	46.4286	24	26	28	93.75	100	6.66667	0	50	44.4444	94.4444	83.3333	76.9231	43.75	16	8	15	11	10	18	18	12	13	16
2	3482074	80	18.1818	40.625	15	33	32	83.3333	66.6667	10.5263	28.5714	44.4444	35.7143	100	53.3333	18.1818	72.7273	12	3	19	14	18	14	7	15	11	11
2	3482075	100	6.66667	54.8387	23	30	31	100	100	6.25	7.14286	75	47.8261	100	72.7273	69.2308	40	17	6	16	14	8	23	17	11	13	15
2	3482076	86.6667	12.1212	38.2353	15	33	34	91.6667	66.6667	10.5263	14.2857	36.8421	40	85.7143	43.75	27.2727	81.8182	12	3	19	14	19	15	7	16	11	11
2	3482077	95.8333	3.22581	48.2759	24	31	29	94.4444	100	6.25	0	71.4286	40.9091	100	72.7273	64.2857	46.6667	18	6	16	15	7	22	17	11	14	15
2	3482078	86.6667	19.3548	44.1176	15	31	34	84.6154	100	5.55556	38.4615	47.3684	40	87.5	37.5	20	72.7273	13	2	18	13	19	15	8	16	10	11
2	3482079	100	12.9032	44.8276	23	31	29	100	100	12.5	13.3333	71.4286	36.3636	100	72.7273	71.4286	26.6667	16	7	16	15	7	22	17	11	14	15
2	3482110	87.5	44.8276	47.5	8	29	40	85.7143	100	36.8421	60	58.3333	31.25	100	85.7143	38.4615	88.8889	7	1	19	10	24	16	9	14	13	9
2	3482111	100	18.4211	48.2759	22	38	29	100	100	21.0526	15.7895	80	31.5789	100	76.9231	76.9231	55	18	4	19	19	10	19	15	13	13	20
2	3482117	90.9091	30.303	53.8462	11	33	39	90	100	23.8095	41.6667	58.3333	46.6667	100	76.9231	30.7692	83.3333	10	1	21	12	24	15	10	13	13	12
2	3482118	100	12.5	48.2759	25	40	29	100	100	10	15	80	31.5789	100	57.1429	75	45	20	5	20	20	10	19	15	14	12	20
2	3482143	92.8571	10.2564	41.1765	14	39	34	90.9091	100	0	23.5294	50	25	100	64.2857	25	50	11	3	22	17	22	12	8	14	12	14
2	3482144	95.6522	2.5641	36.1111	23	39	36	94.1176	100	0	5.26316	57.1429	22.7273	100	46.1538	36.3636	22.2222	17	6	20	19	14	22	14	13	11	18
2	3482164	100	5.26316	56.25	16	38	32	100	100	0	11.1111	61.9048	45.4545	100	50	41.6667	76.9231	11	5	20	18	21	11	6	12	12	13
2	3482165	100	9.67742	32.3529	20	31	34	100	100	20	0	50	16.6667	100	33.3333	33.3333	36.8421	14	6	15	16	16	18	11	15	9	19
2	3482211	94.7368	23.3333	50	19	30	24	93.3333	100	13.3333	33.3333	52.6316	40	100	70	57.1429	81.8182	15	4	15	15	19	5	8	10	7	11
2	3482212	92.8571	20.5128	55.814	28	39	43	100	80	19.0476	22.2222	72.7273	38.0952	94.7368	69.2308	71.4286	61.9048	18	10	21	18	22	21	19	13	14	21
2	3482232	94.1176	11.1111	66.6667	17	27	24	92.3077	100	20	0	64.7059	71.4286	100	33.3333	50	70	13	4	15	12	17	7	9	9	6	10
2	3482233	90	12.1951	60.8696	30	41	46	90.4762	88.8889	8.33333	17.6471	73.913	47.8261	100	53.3333	42.8571	47.8261	21	9	24	17	23	23	18	15	14	23
2	3482284	87.5	5	63.1579	8	20	19	85.7143	100	0	16.6667	53.8462	83.3333	83.3333	50	75	62.5	7	1	14	6	13	6	6	6	4	8
2	3482285	97.4359	14.2857	56.8182	39	42	44	100	92.3077	20.8333	5.55556	66.6667	45	86.6667	62.5	38.4615	31.8182	26	13	24	18	24	20	15	16	13	22
2	3482311	100	0	54.5455	7	8	11	100	100	0	0	33.3333	80	75	50	50	83.3333	6	1	6	2	6	5	4	4	2	6
2	3482312	91.1765	20.9302	50	34	43	36	90.9091	91.6667	16	27.7778	57.1429	40	92.8571	73.3333	75	47.3684	22	12	25	18	21	15	14	15	8	19
2	3482387	80	10	66.6667	5	10	6	75	100	0	25	100	60	100	100	100	33.3333	4	1	6	4	1	5	6	4	3	3
2	3482388	96.9697	28.8889	56.4103	33	45	39	100	93.3333	30.7692	26.3158	70	42.1053	72.7273	70.5882	55.5556	40	18	15	26	19	20	19	11	17	9	15
3	3492829	0	60	33.3333	7	5	6	0	0	0	75	50	0	20	0	25	0	4	3	1	4	4	2	5	1	4	1
3	3492978	4	83.871	48.6486	25	31	37	0	16.6667	85.7143	82.3529	61.1111	36.8421	58.6207	14.2857	25	31.5789	19	6	14	17	18	19	29	21	16	38
3	3492979	0	71.4286	23.0769	7	14	13	0	0	80	66.6667	20	33.3333	36.3636	62.5	40	50	6	1	5	9	10	3	11	8	5	6
3	3493077	6.66667	81.25	64.7059	15	16	17	0	25	70	100	66.6667	63.6364	18.1818	50	44.4444	55.5556	11	4	10	6	6	11	11	6	9	18
3	3493078	0	100	46.6667	10	17	15	0	0	100	100	40	50	0	66.6667	42.8571	50	8	2	6	11	5	10	5	12	7	4
3	3493099	8.33333	83.3333	53.3333	12	12	15	0	25	87.5	75	60	50	0	50	40	54.5455	8	4	8	4	5	10	10	4	5	11
3	3493100	7.69231	90	53.3333	13	20	15	9.09091	0	87.5	91.6667	100	41.6667	0	81.8182	50	33.3333	11	2	8	12	3	12	7	11	8	3
3	3493113	14.2857	100	42.8571	7	12	14	0	33.3333	100	100	25	50	0	0	25	87.5	4	3	8	4	4	10	7	2	4	8
3	3493114	0	84.2105	53.3333	11	19	15	0	0	75	90.9091	66.6667	50	0	54.5455	28.5714	33.3333	9	2	8	11	3	12	7	11	7	3
3	3493129	0	100	55.5556	5	10	9	0	0	100	100	25	80	0	0	0	75	3	2	8	2	4	5	3	2	3	8
3	3493130	0	78.9474	50	13	19	16	0	0	88.8889	70	50	50	0	50	42.8571	33.3333	11	2	9	10	4	12	8	10	7	3
3	3493133	0	77.7778	66.6667	4	9	6	0	0	71.4286	100	0	80	0	0	0	71.4286	2	2	7	2	1	5	3	1	3	7
3	3493134	0	83.3333	42.8571	13	18	14	0	0	75	90	50	40	0	33.3333	50	50	11	2	8	10	4	10	8	9	6	2
3	3493136	0	66.6667	50	3	9	6	0	0	57.1429	100	0	60	0	NA	33.3333	83.3333	2	1	7	2	1	5	3	NA	3	6
3	3493137	7.69231	93.75	42.8571	13	16	14	0	50	87.5	100	50	40	0	44.4444	57.1429	0	11	2	8	8	4	10	8	9	7	1
3	3493148	0	62.5	50	4	8	6	0	0	57.1429	100	0	60	0	NA	0	20	2	2	7	1	1	5	2	NA	1	5
3	3493149	0	78.9474	37.5	11	19	16	0	0	70	88.8889	33.3333	40	0	44.4444	57.1429	0	9	2	10	9	6	10	8	9	7	1
3	3493158	0	85.7143	40	4	7	5	0	0	85.7143	NA	0	50	0	NA	0	40	2	2	7	NA	1	4	2	NA	2	5
3	3493159	0	100	52.9412	11	19	17	0	0	100	100	66.6667	45.4545	0	50	57.1429	0	9	2	10	9	6	11	8	6	7	1
3	3493183	0	100	25	5	8	4	0	0	100	100	0	33.3333	NA	NA	0	60	3	2	7	1	1	3	NA	NA	2	5
3	3493184	0	86.6667	45.4545	6	15	11	0	NA	88.8889	83.3333	33.3333	50	0	50	50	NA	6	NA	9	6	3	8	6	6	6	NA
4	867679	53.3333	2.38095	47.8261	15	42	23	57.1429	0	5.88235	0	58.3333	36.3636	0	21.4286	0	28.5714	14	1	17	25	12	11	15	14	7	14
4	867684	45.4545	0	28.5714	11	17	21	71.4286	0	0	0	40	18.1818	0	50	0	12.5	7	4	7	10	10	11	10	8	3	8
4	867685	69.2308	2.5641	43.4783	13	39	23	69.2308	NA	5.88235	0	50	36.3636	0	33.3333	0	36.3636	13	NA	17	22	12	11	15	15	7	11
4	867689	50	0	36.3636	12	16	22	75	0	0	0	44.4444	30.7692	0	57.1429	33.3333	11.1111	8	4	7	9	9	13	9	7	3	9
4	867690	80	10.2564	42.8571	15	39	21	85.7143	0	6.25	13.0435	58.3333	22.2222	0	35.7143	0	36.3636	14	1	16	23	12	9	17	14	8	11
4	867692	63.6364	0	33.3333	11	16	21	87.5	0	0	0	50	23.0769	0	57.1429	33.3333	11.1111	8	3	7	9	8	13	9	7	3	9
4	867693	60	8.10811	40.9091	15	37	22	64.2857	0	7.14286	8.69565	41.6667	40	0	40	0	45.4545	14	1	14	23	12	10	17	15	8	11
4	867697	75	2.7027	42.8571	16	37	21	80	0	7.14286	0	50	36.3636	0	14.2857	0	30	15	1	14	23	10	11	17	14	8	10
4	867700	50	6.25	33.3333	10	16	21	71.4286	0	12.5	0	37.5	30.7692	0	57.1429	50	10	7	3	8	8	8	13	8	7	4	10
4	867701	75	2.77778	38.0952	16	36	21	80	0	7.14286	0	40	36.3636	0	20	0	25	15	1	14	22	10	11	17	15	8	12
4	867708	54.5455	7.14286	36.3636	11	14	22	75	0	16.6667	0	44.4444	30.7692	0	42.8571	25	0	8	3	6	8	9	13	8	7	4	9
4	867709	64.7059	0	40	17	36	20	68.75	0	0	0	50	30	0	25	0	33.3333	16	1	15	21	10	10	16	16	8	12
4	867715	44.4444	0	33.3333	9	14	21	57.1429	0	0	0	44.4444	25	0	50	25	11.1111	7	2	6	8	9	12	8	6	4	9
4	867716	56.25	2.77778	36.8421	16	36	19	60	0	0	4.7619	50	27.2727	0	20	0	36.3636	15	1	15	21	8	11	16	15	8	11
4	867729	62.5	14.2857	31.5789	8	14	19	83.3333	0	16.6667	12.5	37.5	27.2727	0	33.3333	0	11.1111	6	2	6	8	8	11	7	6	5	9
4	867730	56.25	0	44.4444	16	36	18	60	0	0	0	57.1429	36.3636	0	20	0	27.2727	15	1	15	21	7	11	13	15	9	11
5	12861941	54.5455	0	50	22	14	26	40	85.7143	0	0	11.1111	70.5882	80	57.1429	33.3333	85.7143	15	7	6	8	9	17	5	7	3	7
5	12861942	66.6667	0	21.4286	24	22	14	45.4545	84.6154	0	0	0	42.8571	100	42.8571	50	33.3333	11	13	13	9	7	7	9	7	2	6
5	12862033	75	11.1111	62.5	4	9	8	66.6667	100	0	14.2857	0	83.3333	100	100	0	100	3	1	2	7	2	6	2	2	1	2
5	12862034	81.0345	8.10811	64.5161	58	37	31	63.6364	85.1064	11.7647	5	42.8571	82.3529	100	53.8462	66.6667	61.5385	11	47	17	20	14	17	15	13	9	13
5	12862040	75	0	50	4	8	8	66.6667	100	0	0	0	66.6667	100	100	0	66.6667	3	1	1	7	2	6	2	1	1	3
5	12862041	73.4375	2.63158	57.1429	64	38	35	46.6667	81.6327	0	4.7619	43.75	68.4211	100	57.1429	0	28.5714	15	49	17	21	16	19	14	14	9	14
5	12862158	100	33.3333	75	1	3	4	100	NA	0	50	66.6667	100	100	100	NA	100	1	NA	1	2	3	1	5	1	NA	1
5	12862159	76.1194	11.1111	64.1509	67	36	53	61.9048	82.6087	16.6667	5.55556	50	77.7778	92.3077	55.5556	78.5714	73.3333	21	46	18	18	26	27	26	18	14	15
5	12862204	100	0	33.3333	1	2	3	100	NA	0	0	33.3333	NA	75	100	NA	100	1	NA	1	1	3	NA	4	1	NA	1
6	788094	88.8889	38.4615	55	9	26	20	100	50	23.0769	53.8462	62.5	50	87.5	80	83.3333	66.6667	7	2	13	13	8	12	8	5	6	12
6	788095	73.913	28.8462	70.3704	46	52	54	85.7143	36.3636	19.2308	38.4615	64	75.8621	77.4194	86.6667	90	44.8276	35	11	26	26	25	29	31	30	10	29
6	788184	93.75	37.931	66.6667	16	29	33	100	66.6667	38.4615	37.5	68.4211	64.2857	91.6667	100	100	70	13	3	13	16	19	14	12	6	5	20
6	788185	85.3659	44.5946	79.0323	41	74	62	96.875	44.4444	45.1613	44.186	82.7586	75.7576	94.2857	82.8571	100	64.7059	32	9	31	43	29	33	35	35	15	34
6	788193	94.4444	50	75.7576	18	28	33	93.3333	100	46.1538	53.3333	75	76.9231	100	100	100	85	15	3	13	15	20	13	13	6	5	20
6	788231	90.4762	34.6154	61.7647	21	26	34	94.1176	75	50	27.7778	50	75	75	88.8889	100	57.8947	17	4	8	18	18	16	12	9	8	19
6	788232	82.7586	28	59.1837	29	50	49	100	28.5714	22.2222	31.25	57.8947	60	78.9474	84.6154	100	55.5556	22	7	18	32	19	30	19	26	8	18
6	788268	86.9565	30.4348	69.697	23	23	33	100	50	25	33.3333	50	93.3333	77.7778	100	85.7143	58.3333	17	6	8	15	18	15	9	9	7	12
7	4710647	0	50	18.5185	16	26	27	0	0	33.3333	64.2857	0	27.7778	7.14286	6.25	11.1111	0	10	6	12	14	9	18	14	16	9	6
7	4710678	0	57.1429	17.3913	14	14	23	0	NA	71.4286	42.8571	8.33333	27.2727	10	0	0	44.4444	14	NA	7	7	12	11	10	8	5	9
7	4710679	5.26316	50	20.6897	19	22	29	7.69231	0	75	35.7143	9.09091	27.7778	12.5	5.88235	0	0	13	6	8	14	11	18	16	17	9	7
7	4710684	13.6364	72.7273	45.1613	22	22	31	18.75	0	87.5	64.2857	30	52.381	53.3333	5.88235	0	0	16	6	8	14	10	21	15	17	9	8
7	4710685	13.3333	78.5714	20.8333	15	14	24	13.3333	NA	71.4286	85.7143	7.69231	36.3636	80	0	50	40	15	NA	7	7	13	11	10	9	6	10
7	4710686	9.09091	59.0909	38.7097	22	22	31	12.5	0	50	64.2857	10	52.381	53.3333	12.5	0	50	16	6	8	14	10	21	15	16	9	8
7	4710700	11.7647	57.8947	19.2308	17	19	26	11.7647	NA	33.3333	80	0	38.4615	27.2727	0	0	21.4286	17	NA	9	10	13	13	11	9	8	14
7	4710701	12	57.1429	33.3333	25	21	30	15	0	50	60	23.0769	41.1765	40	11.7647	10	33.3333	20	5	6	15	13	17	15	17	10	9
8	8926483	96	48.3871	61.5385	25	31	39	100	66.6667	50	46.1538	87.5	43.4783	100	90	84.6154	86.6667	22	3	18	13	16	23	8	10	13	15
8	8926518	100	47.0588	80	13	17	15	100	100	44.4444	50	100	57.1429	83.3333	100	100	88.8889	12	1	9	8	8	7	6	10	4	9
8	8926519	78.9474	33.3333	61.1111	19	33	36	81.25	66.6667	36.8421	28.5714	93.3333	38.0952	100	100	88.8889	80	16	3	19	14	15	21	4	9	9	5
8	8926529	100	47.0588	73.3333	11	17	15	100	NA	44.4444	50	87.5	57.1429	83.3333	100	100	100	11	NA	9	8	8	7	6	9	5	8
8	8926530	90	25	60	20	28	30	88.2353	100	26.6667	23.0769	100	45.4545	75	100	100	100	17	3	15	13	8	22	4	9	10	3
8	8926535	100	47.0588	84.6154	10	17	13	100	NA	44.4444	50	87.5	80	66.6667	88.8889	100	71.4286	10	NA	9	8	8	5	6	9	5	7
8	8926536	88.8889	27.5862	36.6667	18	29	30	93.3333	66.6667	26.6667	28.5714	77.7778	19.0476	66.6667	62.5	80	50	15	3	15	14	9	21	3	8	10	2
8	8926579	83.3333	27.7778	71.4286	6	18	14	83.3333	NA	11.1111	44.4444	90	25	71.4286	57.1429	50	57.1429	6	NA	9	9	10	4	7	7	4	7
9	867636	75	7.69231	53.3333	20	39	30	83.3333	0	10.5263	5	42.8571	62.5	0	38.4615	14.2857	26.3158	18	2	19	20	14	16	12	13	7	19
9	867638	58.3333	12.5	33.3333	12	16	15	77.7778	0	14.2857	11.1111	25	42.8571	0	40	0	20	9	3	7	9	8	7	8	5	5	10
9	867639	75	2.85714	53.3333	20	35	30	83.3333	0	0	5	42.8571	62.5	16.6667	41.6667	14.2857	31.5789	18	2	15	20	14	16	12	12	7	19
9	867649	72.7273	18.75	41.1765	11	16	17	88.8889	0	14.2857	22.2222	37.5	44.4444	0	33.3333	0	11.1111	9	2	7	9	8	9	9	6	5	9
9	867650	70	8.57143	53.3333	20	35	30	77.7778	0	6.66667	10	50	56.25	0	23.0769	0	43.75	18	2	15	20	14	16	13	13	6	16
9	867651	63.6364	18.75	47.0588	11	16	17	77.7778	0	14.2857	22.2222	62.5	33.3333	0	33.3333	0	12.5	9	2	7	9	8	9	9	6	5	8
9	867652	63.1579	5.71429	53.5714	19	35	28	70.5882	0	6.66667	5	46.1538	60	0	30.7692	0	40	17	2	15	20	13	15	13	13	7	15
10	3484015	89.4737	40	73.6842	19	15	19	100	66.6667	50	28.5714	55.5556	90	90	71.4286	57.1429	75	13	6	8	7	9	10	10	7	7	4
10	3484016	84.2105	43.4783	65	19	23	20	86.6667	75	33.3333	50	45.4545	88.8889	75	75	71.4286	70	15	4	9	14	11	9	8	8	7	10
10	3484920	100	37.5	75	5	8	16	100	100	100	16.6667	80	72.7273	100	85.7143	100	100	4	1	2	6	5	11	7	7	3	1
10	3485332	100	36.8421	70.5882	11	19	17	100	100	16.6667	71.4286	70	71.4286	82.3529	70	75	70	8	3	12	7	10	7	17	10	4	10
10	3485333	98	43.3333	68.75	50	60	64	97.7273	100	42.4242	44.4444	67.6471	70	100	82.6087	66.6667	88	44	6	33	27	34	30	31	23	15	25
10	3485398	92.3077	13.3333	90.9091	13	15	11	91.6667	100	22.2222	0	100	83.3333	83.3333	85.7143	50	55.5556	12	1	9	6	5	6	6	7	6	9
10	3485399	95.2381	11.4754	59.7015	42	61	67	94.2857	100	14.2857	7.69231	58.0645	61.1111	89.2857	63.6364	42.8571	39.2857	35	7	35	26	31	36	28	22	14	28
11	16463135	31.1688	82.8571	62.2951	77	35	122	33.8028	0	82.8571	NA	56.338	70.5882	32.2034	47.1429	67.1053	31.9149	71	6	35	NA	71	51	118	70	76	141
11	16463136	43.75	88.8889	69.3333	48	36	75	52.5	0	88.8889	NA	63.6364	85	28.3019	59.0909	72.7273	41.0714	40	8	36	NA	55	20	53	22	44	56
11	16463146	22.6667	77.7778	41.5254	75	36	118	24.6377	0	77.7778	NA	35.2113	51.0638	9.48276	29.8507	35.2113	9.48905	69	6	36	NA	71	47	116	67	71	137
11	16463147	18.3673	73.6842	46.1538	49	38	78	21.9512	0	73.6842	NA	44.8276	50	8.92857	33.3333	42.5926	18.0328	41	8	38	NA	58	20	56	24	54	61
11	16463183	23.7288	79.4118	53.0612	59	34	98	25.4545	0	79.4118	NA	43.3333	68.4211	19.7917	39.6552	61.1111	13.5593	55	4	34	NA	60	38	96	58	54	118
11	16463184	47.3684	91.8367	61.4583	57	49	96	52.9412	0	91.8367	NA	57.5342	73.913	26.6667	39.3939	63.4921	23.8095	51	6	49	NA	73	23	60	33	63	63
11	16463185	35	91.1765	67.7083	60	34	96	38.1818	0	91.1765	NA	62.7119	75.6757	27.0833	41.3793	72.2222	24.1379	55	5	34	NA	59	37	96	58	54	116
12	787903	77.2727	26.9231	60.6061	22	26	33	100	28.5714	33.3333	23.5294	68.75	52.9412	88.8889	88.8889	90.9091	52.381	15	7	9	17	16	17	9	18	11	21
12	787913	87.5	0	71.4286	8	9	7	100	50	0	0	75	66.6667	100	83.3333	100	25	6	2	3	6	4	3	3	6	6	4
12	787914	91.3043	17.2414	58.0645	23	29	31	100	71.4286	33.3333	10	66.6667	50	72.7273	85	100	61.9048	16	7	9	20	15	16	11	20	11	21
12	787981	87.5	31.5789	72.7273	8	19	11	100	50	25	36.3636	75	71.4286	85.7143	100	100	75	6	2	8	11	4	7	7	6	4	4
12	787982	85	38.0952	73.6842	20	21	19	100	50	42.8571	35.7143	77.7778	70	80	84.6154	80	38.8889	14	6	7	14	9	10	10	13	10	18
12	788005	87.5	29.1667	71.4286	8	24	14	100	50	22.2222	33.3333	83.3333	62.5	100	71.4286	66.6667	75	6	2	9	15	6	8	8	7	3	4
13	78913085	28.9474	87.8049	51.8519	38	41	27	36.3636	18.75	86.6667	88.4615	26.6667	83.3333	76.9231	90.4762	92.3077	80	22	16	15	26	15	12	26	21	13	20
13	78913086	30	90	60	10	10	15	25	50	80	100	25	72.7273	83.3333	50	75	71.4286	8	2	5	5	4	11	6	6	4	7
13	78913136	22.8571	88.0952	48.7179	35	42	39	22.2222	25	85.7143	89.2857	24	92.8571	64.2857	90.9091	92.8571	69.5652	27	8	14	28	25	14	28	22	14	23
13	78913137	44.4444	93.75	72.2222	9	16	18	28.5714	100	100	90	33.3333	91.6667	40	66.6667	66.6667	66.6667	7	2	6	10	6	12	5	6	3	6
13	78913195	33.3333	93.75	54.902	33	48	51	40	12.5	94.7368	93.1034	26.6667	95.2381	78.2609	81.4815	94.4444	72.7273	25	8	19	29	30	21	23	27	18	22
13	78913196	25	100	75	12	20	24	25	25	100	100	25	100	100	85.7143	75	55.5556	8	4	9	11	8	16	7	7	4	9
14	79002003	89.4737	13.7931	68.9655	19	29	29	92.8571	80	11.7647	16.6667	85.7143	53.3333	78.5714	18.75	100	100	14	5	17	12	14	15	14	16	6	12
14	79002004	70	0	66.6667	10	19	21	66.6667	100	0	0	55.5556	75	62.5	0	80	90	9	1	11	8	9	12	8	8	5	20
14	79002010	100	23.0769	80.7692	17	26	26	100	100	20	27.2727	92.3077	69.2308	90.9091	18.75	100	100	12	5	15	11	13	13	11	16	5	11
14	79002011	100	33.3333	77.2727	9	18	22	100	100	27.2727	42.8571	77.7778	76.9231	100	28.5714	100	100	8	1	11	7	9	13	10	7	3	17
14	79002012	100	24	77.7778	17	25	27	100	100	20	30	92.8571	61.5385	91.6667	26.6667	100	100	12	5	15	10	14	13	12	15	5	11
14	79002013	66.6667	0	50	9	18	22	57.1429	100	0	0	33.3333	61.5385	100	0	33.3333	75	7	2	11	7	9	13	10	7	3	16
15	13544786	58.8235	0	28.2609	34	29	46	62.5	50	0	0	0	52	55.5556	60	40	73.3333	24	10	17	12	21	25	18	25	15	15
15	13544884	41.6667	0	29.1667	12	9	24	55.5556	0	0	0	0	58.3333	50	55.5556	14.2857	60	9	3	5	4	12	12	4	9	7	10
15	13544885	42.1053	0	32.6531	38	42	49	61.5385	0	0	0	5.26316	50	26.087	42.1053	57.1429	77.7778	26	12	23	19	19	30	23	19	14	18
15	13544927	81.8182	0	77.7778	11	1	9	88.8889	50	NA	0	NA	77.7778	25	62.5	42.8571	64.2857	9	2	NA	1	NA	9	8	8	7	14
15	13544928	58.6207	0	20	29	31	35	63.6364	42.8571	0	0	0	31.8182	25	22.2222	66.6667	41.1765	22	7	16	15	13	22	20	9	6	17
16	62305530	46.1538	0	38.4615	13	12	13	0	100	0	0	0	62.5	60	14.2857	75	100	7	6	5	7	5	8	5	7	4	7
16	62305531	53.5714	0	19.2308	28	23	26	0	100	0	0	0	45.4545	63.6364	44.4444	25	84.6154	13	15	12	11	15	11	11	9	8	13
16	62305551	100	50	81.25	15	18	16	100	100	0	81.8182	83.3333	80	80	57.1429	83.3333	69.2308	9	6	7	11	6	10	5	7	6	13
16	62305552	78.2609	33.3333	77.2727	23	15	22	75	81.8182	0	83.3333	91.6667	60	71.4286	81.8182	85.7143	76.9231	12	11	9	6	12	10	14	11	7	13
16	62305787	87.5	28.5714	55.5556	8	7	9	100	66.6667	16.6667	100	50	66.6667	66.6667	NA	100	50	5	3	6	1	6	3	6	NA	1	4
17	65820957	0	65.5172	15.7895	17	29	19	0	0	0	100	30	0	0	30	0	0	12	5	10	19	10	9	8	10	8	14
17	65820958	0	53.125	22.7273	9	32	22	0	0	0	89.4737	50	0	0	66.6667	0	0	8	1	13	19	10	12	8	9	6	4
17	65821065	0	58	29.1667	27	50	48	0	0	4.7619	96.5517	50	0	0	33.3333	0	0	20	7	21	29	28	20	18	21	13	20
17	65821066	0	64.2857	18.1818	8	14	11	0	NA	0	100	33.3333	0	0	40	0	0	8	NA	5	9	6	5	1	5	5	2
17	65821155	0	45.7143	23.0769	17	35	26	0	0	0	72.7273	42.8571	0	0	40	0	0	12	5	13	22	14	12	9	10	8	13
18	84582891	60	0	50	5	1	2	60	NA	NA	0	0	100	0	100	50	NA	5	NA	NA	1	1	1	1	1	2	NA
18	84582961	58.0645	12.963	50	31	54	44	52.381	70	7.40741	18.5185	63.6364	36.3636	23.0769	70	50	33.3333	21	10	27	27	22	22	13	10	12	24
18	84582965	65.625	12.5	47.7273	32	56	44	61.9048	72.7273	0	25	68.1818	27.2727	0	63.6364	53.3333	20	21	11	28	28	22	22	12	11	15	25
18	84582966	87.5	40	66.6667	8	10	12	87.5	NA	0	50	66.6667	66.6667	0	100	25	100	8	NA	2	8	6	6	1	1	4	1
18	84582989	55.8824	10.3448	43.9024	34	58	41	59.0909	50	10.3448	10.3448	50	38.0952	7.14286	66.6667	50	26.6667	22	12	29	29	20	21	14	12	14	30
19	877309	0	95.4545	68.1818	16	22	22	0	NA	90.9091	100	72.7273	63.6364	0	91.6667	0	87.5	16	NA	11	11	11	11	8	12	11	16
19	877310	33.3333	100	47.619	15	21	21	0	100	100	100	36.3636	60	0	100	0	90.9091	10	5	10	11	11	10	8	10	6	11
19	877334	5.88235	87.5	52.6316	17	16	19	0	100	100	75	66.6667	46.1538	0	85.7143	0	92.8571	16	1	8	8	6	13	8	7	10	14
19	877335	30.7692	100	40	13	18	20	0	100	100	100	20	60	0	90	0	100	9	4	10	8	10	10	10	10	7	9
20	2054956	16.6667	89.4737	81.8182	6	19	11	0	100	91.6667	85.7143	83.3333	80	77.7778	75	100	75	5	1	12	7	6	5	9	4	2	4
20	2054957	25	96.5517	76	20	29	25	0	83.3333	93.75	100	100	40	66.6667	100	90.9091	83.3333	14	6	16	13	15	10	12	13	11	18
20	2054962	0	100	83.3333	5	20	12	0	NA	100	100	83.3333	83.3333	88.8889	100	100	100	5	NA	12	8	6	6	9	4	4	4
20	2054963	30	96.5517	75	20	29	28	0	100	100	92.3077	93.75	50	81.8182	84.6154	90.9091	89.4737	14	6	16	13	16	12	11	13	11	19
21	2081421	75	13.3333	41.6667	8	15	12	75	NA	10	20	60	28.5714	80	50	80	55.5556	8	NA	10	5	5	7	5	6	5	9
21	2081447	91.6667	43.4783	50	12	23	20	91.6667	NA	41.6667	45.4545	41.6667	62.5	75	66.6667	40	41.6667	12	NA	12	11	12	8	8	12	5	12
21	2081476	100	56.6667	69.5652	12	30	23	100	NA	46.6667	66.6667	50	90.9091	88.8889	64.2857	50	64.2857	12	NA	15	15	12	11	9	14	6	14
21	2081483	100	25	65.3846	13	32	26	100	NA	13.3333	35.2941	53.3333	81.8182	80	57.1429	42.8571	56.25	13	NA	15	17	15	11	10	14	7	16
22	3415439	0	52.9412	22.2222	18	17	18	0	0	40	71.4286	28.5714	18.1818	0	33.3333	0	10	12	6	10	7	7	11	6	3	4	10
22	3415452	0	53.8462	28.125	27	26	32	0	0	44.4444	58.8235	26.6667	29.4118	23.5294	15.7895	8.33333	31.5789	24	3	9	17	15	17	17	19	12	19
22	3415453	5.88235	56.25	31.5789	17	16	19	9.09091	0	55.5556	57.1429	25	36.3636	0	50	0	28.5714	11	6	9	7	8	11	6	4	3	7
22	3415458	3.7037	57.1429	16.6667	27	21	30	4.16667	0	62.5	53.8462	7.14286	25	18.75	26.3158	16.6667	21.0526	24	3	8	13	14	16	16	19	12	19
23	3485547	100	5.55556	28.5714	5	18	21	100	100	9.09091	0	40	18.1818	77.7778	33.3333	100	46.1538	3	2	11	7	10	11	9	6	4	13
23	3485548	100	14.2857	61.1111	20	14	18	100	100	28.5714	0	44.4444	77.7778	75	42.8571	40	28.5714	12	8	7	7	9	9	4	7	5	7
23	3485850	97.5	57.4074	78.7234	40	54	47	96.5517	100	55.1724	60	76	81.8182	94.7368	80.7692	86.6667	71.4286	29	11	29	25	25	22	19	26	15	21
23	3485926	90.9091	35.7143	83.3333	22	14	18	100	87.5	50	16.6667	77.7778	88.8889	87.5	75	66.6667	83.3333	6	16	8	6	9	9	8	8	3	6
24	5940948	60	0	28.5714	15	19	21	90	0	0	0	0	75	0	23.0769	40	0	10	5	7	12	13	8	8	13	5	8
24	5940949	50	7.69231	23.0769	10	13	13	100	0	12.5	0	0	50	0	53.8462	90.9091	0	5	5	8	5	7	6	4	13	11	7
24	5941033	64.2857	0	28.5714	14	20	28	81.8182	0	0	0	0	50	0	100	88.8889	0	11	3	11	9	12	16	9	9	9	8
24	5941034	62.5	4.54545	16.6667	16	22	24	83.3333	0	0	9.09091	0	36.3636	0	66.6667	71.4286	0	12	4	11	11	13	11	10	15	14	9
25	9516640	0	93.1034	37.5	14	29	32	0	0	88.8889	95	0	92.3077	46.1538	37.5	100	50	11	3	9	20	19	13	13	16	5	8
25	9516641	0	93.1034	48	14	29	25	0	0	94.4444	90.9091	0	80	61.1111	71.4286	100	56.25	11	3	18	11	10	15	18	7	6	16
25	9516647	0	96.2963	59.375	13	27	32	0	0	88.8889	100	38.8889	85.7143	69.2308	46.6667	100	50	11	2	9	18	18	14	13	15	4	8
25	9516648	0	96.6667	52.1739	15	30	23	0	0	95.2381	100	10	84.6154	66.6667	71.4286	75	73.3333	12	3	21	9	10	13	18	7	8	15
26	9872498	0	59.4595	9.09091	29	37	44	0	0	58.3333	61.5385	17.3913	0	66.6667	77.7778	71.4286	31.0345	22	7	24	13	23	21	18	18	14	29
26	9872499	0	65.3846	19.0476	15	26	21	0	0	53.8462	76.9231	50	0	47.3684	45.4545	33.3333	50	11	4	13	13	8	13	19	11	6	10
26	9872526	0	51.7241	20	22	29	30	0	0	57.8947	40	40	0	70	87.5	66.6667	40.9091	17	5	19	10	15	15	20	16	12	22
26	9872527	0	60.6061	11.5385	22	33	26	0	0	50	73.3333	27.2727	0	57.8947	71.4286	45.4545	46.1538	17	5	18	15	11	15	19	14	11	13
27	11638910	63.6364	0	55.5556	11	25	18	85.7143	25	0	0	50	60	0	88.8889	22.2222	40	7	4	10	15	8	10	13	9	9	5
27	11638911	50	0	32	16	21	25	46.1538	66.6667	0	0	14.2857	54.5455	0	81.25	80	70.5882	13	3	8	13	14	11	8	16	5	17
27	11638999	100	0	63.6364	7	14	11	100	100	0	0	50	80	0	88.8889	33.3333	100	5	2	6	8	6	5	6	9	9	4
27	11639000	95	0	65.3846	20	22	26	93.75	100	0	0	40	81.25	0	84.6154	33.3333	92.3077	16	4	10	12	10	16	6	13	6	13
28	20549621	0	52.6316	20.6897	23	38	29	0	0	74.0741	0	0	27.2727	52.1739	0	10	0	16	7	27	11	7	22	23	16	10	12
28	20549622	0	55.1724	11.7647	24	29	34	0	0	94.1176	0	0	20	68.75	0	0	0	20	4	17	12	14	20	16	15	10	15
28	20550056	0	49.0196	15.2542	49	51	59	0	0	92.5926	0	0	36	39.2857	0	0	0	35	14	27	24	34	25	28	27	18	21
28	20550057	0	42.8571	11.5385	14	21	26	0	0	81.8182	0	0	33.3333	33.3333	0	0	0	11	3	11	10	17	9	12	11	6	11
29	59740080	85.1852	0	20.8333	27	22	24	77.7778	100	0	0	41.6667	0	61.5385	5.55556	42.8571	0	18	9	5	17	12	12	13	18	7	12
29	59740081	96.2963	0	19.5122	27	40	41	94.1176	100	0	0	40	0	40	0	33.3333	0	17	10	19	21	20	21	5	16	12	26
29	59740171	85.7143	0	25	28	15	32	88.8889	80	0	0	53.3333	0	40	6.66667	75	0	18	10	6	9	15	17	10	15	8	9
29	59740172	79.4872	0	16.1765	39	53	68	82.1429	72.7273	0	0	31.4286	0	47.619	0	23.8095	0	28	11	24	29	35	33	21	21	21	37
30	63541114	0	84.8485	65.2174	41	33	23	0	0	89.4737	78.5714	66.6667	63.6364	9.09091	35	0	46.1538	13	28	19	14	12	11	11	20	8	13
30	63541115	0	100	84.6154	6	9	13	0	0	100	100	100	66.6667	16.6667	33.3333	0	50	5	1	3	6	7	6	6	3	4	2
30	63541591	0	76.7442	73.3333	48	43	30	0	0	78.2609	75	88.8889	50	36	71.4286	0	50	23	25	23	20	18	12	25	21	5	12
30	63541592	0	64.2857	18.1818	8	14	11	0	0	50	83.3333	40	0	28.5714	66.6667	0	100	7	1	8	6	5	6	7	6	1	1
31	63559406	0	100	80	6	19	10	0	NA	100	100	100	50	88.8889	57.1429	0	75	6	NA	11	8	6	4	9	7	9	8
31	63559407	0	86.9565	60	26	23	40	0	0	100	78.5714	79.1667	31.25	61.1111	21.4286	0	58.8235	14	12	9	14	24	16	18	14	5	17
31	63559463	0	95.4545	62.5	10	22	8	0	NA	90.9091	100	100	0	0	50	0	81.8182	10	NA	11	11	5	3	10	8	10	11
31	63559464	0	87.8788	70.4545	29	33	44	0	0	100	80.9524	88.4615	44.4444	0	17.6471	0	61.9048	23	6	12	21	26	18	17	17	6	21
32	65505469	80	0	20	10	12	10	100	0	0	0	16.6667	25	75	28.5714	0	83.3333	8	2	6	6	6	4	8	7	6	6
32	65505470	42.3077	0	29.4118	26	23	17	84.6154	0	0	0	36.3636	16.6667	86.6667	63.6364	0	80	13	13	8	15	11	6	15	11	5	10
32	65505503	76.4706	0	42.8571	17	22	14	100	20	0	0	40	50	90.9091	54.5455	0	100	12	5	11	11	10	4	11	11	9	9
32	65505504	56.5217	0	44.4444	23	23	18	92.8571	0	0	0	40	50	84.6154	62.5	0	100	14	9	8	15	10	8	13	8	6	10
33	65819305	3.0303	61.5385	34	33	52	50	3.84615	0	0	94.1176	62.963	0	0	47.8261	0	0	26	7	18	34	27	23	15	23	7	26
33	65819306	0	51.7241	9.52381	19	29	21	0	0	0	100	25	0	0	57.8947	0	0	17	2	14	15	8	13	12	19	8	11
33	65819549	0	48.2759	31.25	20	29	32	0	0	0	100	55.5556	0	0	35	0	0	14	6	15	14	18	14	9	20	7	9
33	65819550	0	66.6667	19.0476	14	21	21	0	0	0	100	36.3636	0	0	55.5556	0	0	9	5	7	14	11	10	9	9	2	9
34	73427356	0	85.7143	26.6667	10	14	15	0	0	75	100	28.5714	25	0	50	80	75	8	2	8	6	7	8	4	6	5	4
34	73427357	12.5	75	46.6667	32	32	30	0	40	73.6842	76.9231	42.1053	54.5455	0	60	50	60	22	10	19	13	19	11	13	20	8	25
34	73427436	0	97.0588	34.4828	13	34	29	0	0	95.2381	100	42.8571	31.8182	5.88235	50	71.4286	77.7778	10	3	21	13	7	22	17	16	7	9
34	73427437	5.26316	96	45	19	25	20	0	25	100	91.6667	38.4615	57.1429	0	63.6364	50	100	15	4	13	12	13	7	8	11	6	15
35	77308996	100	0	70	7	22	20	100	100	0	0	60	80	61.5385	40	0	44.4444	6	1	7	15	10	10	13	15	3	9
35	77308997	100	0	96	26	14	25	100	100	NA	0	100	92.8571	94.4444	47.0588	18.1818	29.4118	16	10	NA	14	11	14	18	17	11	17
35	77309218	100	53.3333	66.6667	14	15	12	100	100	0	88.8889	20	100	0	100	100	92.3077	11	3	6	9	5	7	9	7	5	13
35	77309219	95.2381	45.8333	81.8182	21	24	22	92.3077	100	0	91.6667	57.1429	93.3333	0	94.4444	100	86.6667	13	8	12	12	7	15	9	18	5	15
36	78027719	25.8065	87.5	64.7059	31	64	51	0	100	84.8485	90.3226	50	77.7778	0	50	0	40	23	8	33	31	24	27	22	14	19	20
36	78027720	10	83.3333	50	10	18	20	0	50	81.8182	85.7143	42.8571	66.6667	0	33.3333	0	28.5714	8	2	11	7	14	6	6	3	5	7
36	78027834	20	82.3529	77.4194	15	34	31	0	60	77.2727	91.6667	50	100	0	25	0	50	10	5	22	12	14	17	13	4	7	10
36	78027835	30.7692	75	42.8571	13	12	14	0	57.1429	62.5	100	28.5714	57.1429	0	0	0	20	6	7	8	4	7	7	6	2	6	5
37	80162606	50	0	35.7143	8	14	14	100	0	0	0	42.8571	28.5714	0	87.5	0	0	4	4	6	8	7	7	7	8	5	9
37	80162607	73.6842	0	35.2941	19	24	17	93.3333	0	0	0	37.5	33.3333	0	100	0	0	15	4	15	9	8	9	10	8	8	3
37	80162895	100	0	28.5714	15	20	14	100	100	0	0	20	50	0	100	0	0	11	4	9	11	10	4	10	8	3	6
37	80162896	75	0	38.0952	32	13	21	71.4286	81.8182	0	0	27.2727	50	0	77.7778	44.4444	0	21	11	6	7	11	10	7	18	9	7
38	80549158	20	89.3939	56.6667	40	66	60	0	88.8889	93.1034	86.4865	37.8378	86.9565	78.2609	51.8519	88.8889	39.2857	31	9	29	37	37	23	23	27	18	28
38	80549159	45.4545	94.7368	68.75	22	19	32	0	83.3333	100	88.8889	43.75	93.75	93.3333	56.25	60	37.5	10	12	10	9	16	16	15	16	5	8
38	80549257	25.7576	95.5882	68.6747	66	68	83	2	100	96.6667	94.7368	52.1739	89.1892	88.0952	51.7241	100	93.75	50	16	30	38	46	37	42	29	24	32
38	80549258	33.3333	100	77.4194	21	19	31	0	100	100	100	62.5	93.3333	100	40	87.5	100	14	7	7	12	16	15	10	10	8	13
39	81143687	7.69231	88.0952	21.875	13	42	32	9.09091	0	85.7143	90.4762	50	0	0	91.3043	91.6667	45.4545	11	2	21	21	14	18	20	23	12	22
39	81143688	0	82.3529	13.0435	11	17	23	0	0	88.8889	75	27.2727	0	0	90	75	66.6667	10	1	9	8	11	12	3	10	8	9
39	81143842	0	90.6977	20.4082	25	43	49	0	0	90.4762	90.9091	47.619	0	0	91.6667	83.3333	34.6154	20	5	21	22	21	28	15	24	6	26
39	81143843	0	89.0625	23.9437	34	64	71	0	0	96.2963	83.7838	45.9459	0	0	88.2353	100	53.5714	25	9	27	37	37	34	22	34	24	28
40	82680775	93.75	47.0588	58.4906	32	51	53	92	100	0	92.3077	28.5714	92	90.4762	44.4444	0	44.4444	25	7	25	26	28	25	21	27	13	18
40	82680776	95.4545	52.381	76.6667	22	21	30	94.4444	100	0	100	62.5	92.8571	88.8889	35.7143	0	35.2941	18	4	10	11	16	14	9	14	7	17
40	82680884	85.9155	44.9275	66.6667	71	69	69	87.8049	83.3333	0	88.5714	31.0345	92.5	90.4762	50	0	33.3333	41	30	34	35	29	40	21	36	19	36
40	82680885	100	38.8889	68.4211	5	18	19	100	NA	0	77.7778	50	100	100	40	0	66.6667	5	NA	9	9	12	7	6	5	6	6
41	84418244	100	55.5556	76.4706	14	18	17	100	100	0	90.9091	100	60	100	100	100	89.4737	9	5	7	11	7	10	11	5	10	19
41	84418245	95.6522	12.5	82.6087	23	8	23	90	100	0	100	100	55.5556	100	100	100	100	10	13	7	1	14	9	1	4	6	16
41	84418257	92.8571	0	77.7778	14	17	18	87.5	100	0	0	85.7143	72.7273	100	100	100	94.4444	8	6	8	9	7	11	11	4	10	18
41	84418258	100	0	80.7692	18	8	26	100	100	0	0	100	54.5455	66.6667	100	100	93.3333	7	11	7	1	15	11	3	3	6	15
42	84697912	100	4.16667	68.4211	20	24	19	100	100	6.66667	0	50	100	100	87.5	100	84.6154	15	5	15	9	12	7	12	8	5	13
42	84697913	100	0	66.6667	9	6	9	100	100	0	0	66.6667	66.6667	100	100	100	83.3333	7	2	1	5	6	3	6	2	3	6
42	84698110	100	0	72.3404	23	27	47	100	100	0	0	43.4783	100	90.4762	100	88.8889	100	18	5	13	14	23	24	21	8	9	25
42	84698111	93.75	0	78.5714	16	7	14	100	83.3333	0	0	57.1429	100	87.5	100	100	100	10	6	6	1	7	7	8	3	2	6
43	84867676	25	94.7368	69.5652	12	19	23	0	100	100	87.5	100	53.3333	90	88.8889	62.5	72.7273	9	3	11	8	8	15	10	9	8	11
43	84867677	0	91.6667	81.8182	9	24	22	0	NA	88.8889	93.3333	100	69.2308	100	83.3333	71.4286	55.5556	9	NA	9	15	9	13	16	6	7	9
43	84867695	9.09091	90.4762	75	11	21	24	0	50	90.9091	90	100	57.1429	100	87.5	75	46.1538	9	2	11	10	10	14	10	8	8	13
43	84867696	18.1818	95	81.25	11	20	16	0	100	100	92.3077	100	66.6667	100	83.3333	42.8571	42.8571	9	2	7	13	7	9	13	6	7	7
44	85155383	92.8571	0	46.5116	28	31	43	85.7143	100	0	0	46.4286	46.6667	0	100	0	0	14	14	12	19	28	15	14	9	10	19
44	85155384	100	0	55.5556	9	6	9	100	100	0	0	66.6667	50	0	100	0	0	8	1	4	2	3	6	12	3	2	7
44	85155396	95.4545	0	79.4872	22	29	39	90	100	0	0	100	46.6667	0	100	0	0	10	12	12	17	24	15	14	9	7	17
44	85155397	85.7143	0	62.5	7	5	8	83.3333	100	0	0	66.6667	60	0	100	0	16.6667	6	1	3	2	3	5	11	3	2	6
45	85397786	0	100	66.6667	4	4	6	0	NA	100	100	50	100	0	100	100	100	4	NA	2	2	4	2	1	4	3	2
45	85397787	42.8571	95.4545	75	21	22	24	33.3333	100	90	100	58.3333	91.6667	0	100	100	100	18	3	10	12	12	12	11	6	7	8
45	85397790	25	100	71.4286	4	3	7	25	NA	100	100	60	100	0	0	66.6667	0	4	NA	2	1	5	2	2	4	3	2
45	85397791	30	100	79.1667	20	20	24	35.2941	0	100	100	54.5455	100	0	0	50	0	17	3	9	11	11	13	11	6	8	7
46	552422	8.33333	84.6154	78.2609	12	26	23	0	100	78.5714	91.6667	75	81.8182	50	52.6316	70	66.6667	11	1	14	12	12	11	12	19	10	12
46	552423	7.69231	78.9474	77.4194	26	19	31	0	66.6667	75	81.8182	83.3333	69.2308	50	61.1111	54.5455	76.1905	23	3	8	11	18	13	12	18	11	21
46	552447	0	95.8333	90.9091	13	24	22	0	NA	90	100	91.6667	90	85.7143	61.1111	81.8182	75	13	NA	10	14	12	10	14	18	11	12
47	1858063	40	100	95.8333	15	17	24	0	100	100	100	100	91.6667	100	94.1176	100	100	9	6	8	9	12	12	17	17	9	16
47	1858069	0	88.4615	11.1111	12	26	9	0	0	84.6154	92.3077	0	25	0	35.2941	66.6667	0	9	3	13	13	5	4	8	17	3	9
47	1858070	0	100	33.3333	15	17	27	0	0	100	100	9.09091	50	0	35	77.7778	0	9	6	8	9	11	16	16	20	9	18
48	3481603	100	37.5	46.1538	20	24	26	100	100	33.3333	44.4444	42.8571	50	78.5714	55	42.8571	50	14	6	15	9	14	12	14	20	7	10
48	3481604	96.5517	32.5	59.5238	29	40	42	95.4545	100	35.2941	30.4348	56.25	61.5385	78.5714	64.2857	46.6667	60.8696	22	7	17	23	16	26	14	28	15	23
48	3481656	94.1176	46.4286	78.5714	17	28	28	91.6667	100	38.8889	60	100	62.5	92.3077	86.6667	55.5556	72.7273	12	5	18	10	12	16	13	15	9	11
49	7175777	72.7273	9.09091	58.3333	11	11	12	70	100	0	14.2857	40	71.4286	33.3333	66.6667	0	100	10	1	4	7	5	7	3	9	1	3
49	7175778	77.7778	0	73.913	18	26	23	83.3333	66.6667	0	0	81.8182	66.6667	75	46.1538	0	50	12	6	11	15	11	12	8	13	8	4
49	7175809	100	60	75	8	5	4	100	100	66.6667	50	100	50	0	100	NA	66.6667	7	1	3	2	2	2	1	4	NA	3
50	9555465	0	93.1818	70.9677	13	44	31	0	0	96.1538	88.8889	58.3333	78.9474	65.2174	64.2857	91.6667	54.5455	7	6	26	18	12	19	23	14	12	11
50	9555489	0	100	91.6667	13	10	12	0	0	100	100	75	100	66.6667	50	80	40	7	6	4	6	4	8	6	4	5	5
50	9555490	7.69231	100	79.4118	13	41	34	0	16.6667	100	100	58.8235	100	78.9474	75	83.3333	53.8462	7	6	23	18	17	17	19	16	12	13
51	9873220	3.57143	86.3636	18.1818	28	22	33	7.69231	0	100	72.7273	38.4615	5	27.2727	93.75	82.3529	75	13	15	11	11	13	20	11	16	17	12
51	9873263	0	92.3077	25	15	13	4	0	0	100	87.5	33.3333	0	88.8889	80	100	75	12	3	5	8	3	1	9	5	2	8
51	9873264	4.34783	94.1176	13.6364	23	17	22	9.09091	0	100	88.8889	33.3333	0	62.5	100	100	100	11	12	8	9	9	13	8	9	11	7
52	10279847	4.54545	50	34.6154	22	16	26	0	9.09091	0	80	60	0	0	35.7143	0	0	11	11	6	10	15	11	9	14	9	14
52	10279848	0	59.2593	27.2727	22	27	44	0	0	0	88.8889	54.5455	0	0	27.7778	0	0	17	5	9	18	22	22	12	18	16	21
52	10280016	0	50	33.3333	20	32	30	0	0	0	80	66.6667	0	0	0	0	0	14	6	12	20	15	15	11	18	10	11
53	13259593	79.4118	30.6122	65.8537	34	49	41	80.9524	76.9231	25.9259	36.3636	77.7778	56.5217	29.4118	56.6667	40	31.25	21	13	27	22	18	23	17	30	20	16
53	13259668	76.1905	0	59.0909	21	23	22	87.5	40	0	0	63.6364	54.5455	27.2727	80	20	44.4444	16	5	11	12	11	11	11	10	5	9
53	13259669	86.6667	0	58.8235	15	17	17	80	100	0	0	66.6667	57.1429	14.2857	81.8182	0	55.5556	10	5	8	9	3	14	7	11	3	9
54	15356516	100	25	50	2	4	2	100	NA	50	0	50	NA	0	50	33.3333	NA	2	NA	2	2	2	NA	6	2	3	NA
54	15356755	93.8776	46.3415	69.7368	49	82	76	95	88.8889	0	95	97.4359	40.5405	0	39.1304	0	84.4828	40	9	42	40	39	37	35	46	30	58
54	15356756	93.2203	48.6111	71.875	59	72	96	92.5926	100	0	92.1053	95.2381	53.7037	0	53.0612	2.63158	93.0233	54	5	34	38	42	54	32	49	38	43
55	18243385	100	60	68.75	17	15	16	100	100	0	90	55.5556	85.7143	100	90.9091	90	83.3333	6	11	5	10	9	7	6	11	10	6
55	18243386	86.6667	43.4783	53.3333	15	23	15	100	71.4286	0	100	33.3333	83.3333	100	75	100	75	8	7	13	10	9	6	9	4	3	16
55	18243441	76.6667	35	59.0909	30	20	22	85.7143	73.913	36.3636	33.3333	85.7143	46.6667	87.5	50	44.4444	60	7	23	11	9	7	15	8	16	9	15
56	18967688	20	80	30.4348	10	20	23	0	100	25	93.75	58.3333	0	57.1429	0	50	35.7143	8	2	4	16	12	11	14	8	12	14
56	18967689	19.2308	64.2857	20	26	14	10	5.88235	44.4444	25	80	40	0	0	33.3333	20	25	17	9	4	10	5	5	8	3	5	4
56	18967707	12.5	62.5	28.5714	8	16	21	0	100	0	71.4286	60	0	76.9231	0	60	58.3333	7	1	2	14	10	11	13	7	10	12
57	26527154	73.3333	0	69.2308	15	15	13	100	42.8571	0	0	0	90	33.3333	75	100	100	8	7	7	8	3	10	3	4	2	4
57	26527254	82.0513	0	76.6667	39	43	30	92.3077	61.5385	0	0	58.3333	88.8889	41.1765	83.3333	60	81.8182	26	13	15	28	12	18	17	12	10	11
57	26527255	75	0	40	4	7	5	100	50	0	0	33.3333	50	0	33.3333	100	66.6667	2	2	4	3	3	2	1	3	2	6
58	31523800	14.2857	85.7143	69.5652	14	21	23	7.69231	100	100	76.9231	33.3333	92.8571	28.5714	16.6667	0	71.4286	13	1	8	13	9	14	7	6	7	7
58	31523801	23.8095	95.082	85.3659	42	61	41	0	100	96	94.4444	81.25	88	30.4348	0	0	70.3704	32	10	25	36	16	25	23	22	24	27
58	31524011	57.1429	100	90.9091	7	6	11	50	100	100	100	100	83.3333	85.7143	62.5	50	80	6	1	1	5	5	6	7	8	4	5
59	54123417	73.0769	12	64.2857	26	25	28	64.2857	83.3333	25	0	76.9231	53.3333	100	85.7143	100	100	14	12	12	13	13	15	5	7	6	5
59	54123418	66.6667	20	50	15	15	12	60	80	50	0	28.5714	80	100	100	83.3333	72.7273	10	5	6	9	7	5	11	8	6	11
59	54123511	94.5946	40	93.75	37	20	32	100	92.3077	8.33333	87.5	100	87.5	100	100	40	100	11	26	12	8	16	16	6	7	5	9
60	62365739	100	54.1667	95.4545	27	24	22	100	100	92.8571	0	87.5	100	73.3333	93.3333	83.3333	90.9091	14	13	14	10	8	14	15	15	6	11
60	62365777	100	40	83.3333	4	5	6	100	100	100	0	100	75	100	100	100	0	2	2	2	3	2	4	3	6	2	2
60	62365778	97.2973	44.8276	53.5714	37	29	28	100	94.7368	100	0	83.3333	31.25	95	100	87.5	0	18	19	13	16	12	16	20	12	8	9
61	73398360	9.09091	58.3333	23.0769	11	12	13	0	20	80	42.8571	12.5	40	77.7778	50	100	77.7778	6	5	5	7	8	5	9	10	4	9
61	73398370	0	84.6154	42.8571	15	13	14	0	0	88.8889	75	28.5714	57.1429	0	0	50	81.8182	7	8	9	4	7	7	8	9	10	11
61	73398371	0	84.6154	25	12	13	16	0	0	80	87.5	33.3333	14.2857	0	0	50	77.7778	6	6	5	8	9	7	9	10	4	9
62	77358980	94.2857	0	78.0488	35	41	41	92.8571	100	0	0	57.1429	100	0	88	0	42.8571	28	7	19	22	21	20	12	25	8	14
62	77359080	95	0	59.0909	20	13	22	100	90	0	0	25	100	0	100	0	42.8571	10	10	7	6	12	10	4	3	5	7
62	77359081	82.7586	0	69.4444	29	33	36	77.7778	90.9091	0	0	31.25	100	11.1111	95	0	45.4545	18	11	18	15	16	20	9	20	11	11
63	78855328	83.3333	35.7143	75	12	14	20	83.3333	NA	100	0	71.4286	76.9231	71.4286	90.9091	66.6667	50	12	NA	5	9	7	13	7	11	3	6
63	78855329	91.6667	44.4444	85.7143	12	18	14	87.5	100	88.8889	0	100	81.8182	88.8889	77.7778	80	88.8889	8	4	9	9	3	11	9	9	5	9
63	78855560	84.8485	43.0556	74.3902	66	72	82	86.2745	80	91.1765	0	77.5	71.4286	69.697	78.2609	55.1724	64.8649	51	15	34	38	40	42	33	46	29	37
64	78955135	43.4783	97.1429	44.1176	23	35	34	53.3333	25	100	94.4444	47.619	38.4615	78.9474	70.8333	81.8182	88.2353	15	8	17	18	21	13	19	24	11	17
64	78955140	9.52381	82.3529	35.2941	21	17	17	0	100	70	100	57.1429	20	77.7778	100	85.7143	100	19	2	10	7	7	10	9	9	7	11
64	78955141	10.3448	100	51.5152	29	35	33	0	37.5	100	100	60	38.4615	76.1905	91.6667	90.9091	100	21	8	18	17	20	13	21	24	11	19
65	79002025	91.6667	42.1053	82.6087	12	19	23	90	100	50	33.3333	80	84.6154	90.9091	50	66.6667	100	10	2	10	9	10	13	11	8	3	17
65	79002031	100	30	77.7778	19	20	27	100	100	33.3333	25	71.4286	84.6154	88.8889	33.3333	80	100	15	4	12	8	14	13	9	9	5	14
65	79002032	100	33.3333	80	14	18	20	100	100	44.4444	22.2222	66.6667	90.9091	100	42.8571	66.6667	88.8889	12	2	9	9	9	11	9	7	3	18
66	79657284	14.2857	75	61.5385	14	16	13	7.69231	100	80	72.7273	83.3333	42.8571	80	0	60	88.8889	13	1	5	11	6	7	5	4	5	9
66	79657285	34.1463	80.9524	52.6316	41	42	38	17.8571	69.2308	80	81.8182	71.4286	41.6667	68.75	65	61.5385	50	28	13	20	22	14	24	16	20	13	10
66	79657321	15.3846	91.6667	36.3636	13	12	11	9.09091	50	100	87.5	40	33.3333	66.6667	100	75	75	11	2	4	8	5	6	6	2	4	8
67	81254051	60	0	13.5135	15	20	37	64.2857	0	0	0	31.25	0	60	66.6667	9.09091	30.7692	14	1	8	12	16	21	10	9	11	13
67	81254052	82.4561	0	21.0526	57	63	57	83.7209	78.5714	0	0	44.4444	0	75	69.2308	22.7273	51.8519	43	14	35	28	27	30	24	26	22	27
67	81254139	77.7778	31.8182	50	18	22	26	75	100	33.3333	30.7692	50	50	80	81.8182	66.6667	54.5455	16	2	9	13	16	10	10	11	12	11
68	82384471	100	34.4828	94.1176	23	29	34	100	100	0	90.9091	93.75	94.4444	80	100	100	40.7407	21	2	18	11	16	18	10	17	5	27
68	82384472	97.7273	53.9474	90.2778	44	76	72	97.0588	100	0	93.1818	93.5484	87.8049	77.4194	97.561	85	45.2381	34	10	32	44	31	41	31	41	20	42
68	82384735	90.9091	38.4615	70.8333	22	13	24	86.6667	100	0	83.3333	72.7273	69.2308	14.2857	85.7143	66.6667	55.5556	15	7	7	6	11	13	7	7	12	9
69	84274878	100	60	75	4	5	4	100	100	100	0	NA	75	100	50	75	75	3	1	3	2	NA	4	1	2	4	4
69	84275004	91.8367	51.1905	87.8049	49	84	82	97.2973	75	91.3043	2.63158	87.5	88	61.9048	88	85.7143	40.5405	37	12	46	38	32	50	42	25	21	37
69	84275005	100	47.0588	85	10	17	20	100	100	100	0	87.5	83.3333	100	100	71.4286	44.4444	7	3	8	9	8	12	4	4	7	9
70	84472238	44.4444	90.9091	56	18	22	25	43.75	50	88.8889	92.3077	58.8235	50	63.6364	100	85.7143	86.6667	16	2	9	13	17	8	11	2	7	15
70	84472239	45.4545	94.4444	72	11	18	25	33.3333	60	88.8889	100	70	73.3333	81.8182	100	90	80	6	5	9	9	10	15	11	5	10	10
70	84472251	10	55.5556	44.8276	20	27	29	5.55556	50	69.2308	42.8571	47.3684	40	70	50	70	58.8235	18	2	13	14	19	10	10	2	10	17
71	85216114	90	40.3846	87.5	30	52	40	85.7143	100	100	6.06061	100	72.2222	100	87.5	57.1429	95.2381	21	9	19	33	22	18	23	8	7	21
71	85216129	100	50	73.3333	9	12	15	100	NA	100	14.2857	77.7778	66.6667	100	70	100	100	9	NA	5	7	9	6	12	10	1	14
71	85216130	90.3226	34.0426	74.2857	31	47	35	90.4762	90	100	3.125	100	47.0588	90	100	60	93.75	21	10	15	32	18	17	20	8	5	16
72	88085792	0	65	33.3333	16	20	18	0	0	100	0	0	60	0	0	50	41.6667	8	8	13	7	8	10	6	4	12	12
72	88085793	0	58.8235	20.5882	24	34	34	0	0	95.2381	0	0	36.8421	0	0	41.6667	38.8889	19	5	21	13	15	19	17	20	12	18
72	88085848	0	64	26.4151	39	50	53	0	0	94.1176	0	0	45.1613	5	0	57.1429	84	32	7	34	16	22	31	20	23	14	25
73	89998203	38.4615	97.619	67.8571	26	42	28	47.619	0	95.6522	100	88.8889	57.8947	93.3333	83.3333	100	50	21	5	23	19	9	19	15	18	18	20
73	89998204	33.3333	90	87.5	6	10	8	40	0	100	85.7143	85.7143	100	100	50	85.7143	30	5	1	3	7	7	1	6	2	7	10
73	89998228	41.6667	90.6977	64.7059	24	43	34	47.619	0	90.9091	90.4762	86.6667	47.3684	90	94.7368	80	95.8333	21	3	22	21	15	19	20	19	20	24
74	90148936	53.8462	4.54545	33.3333	26	22	21	56.25	50	6.66667	0	54.5455	10	41.6667	27.2727	16.6667	8.33333	16	10	15	7	11	10	12	11	12	12
74	90148954	45	0	33.3333	20	21	18	45.4545	44.4444	0	0	55.5556	11.1111	50	42.8571	16.6667	10	11	9	14	7	9	9	10	7	12	10
74	90148962	45	4.54545	29.4118	20	22	17	45.4545	44.4444	6.66667	0	50	11.1111	50	50	27.2727	20	11	9	15	7	8	9	8	6	11	10
75	84053	0	90.4762	50	18	21	24	0	0	90	90.9091	37.5	75	57.1429	85.7143	80	78.9474	14	4	10	11	16	8	14	14	10	19
75	84054	0	90	70.9677	18	20	31	0	0	90	90	40	100	52.6316	58.8235	64.2857	65	15	3	10	10	15	16	19	17	14	20
76	84372	0	100	80	3	11	15	0	NA	100	100	50	100	100	62.5	100	100	3	NA	8	3	6	9	9	8	6	6
76	84373	0	93.5897	78.8732	52	78	71	0	0	91.6667	95.2381	65.7143	91.6667	92.5	91.3793	93.1034	93.9394	41	11	36	42	35	36	40	58	29	33
77	84449	0	100	33.3333	5	5	6	0	0	100	100	33.3333	33.3333	0	80	100	66.6667	4	1	3	2	3	3	4	5	2	3
77	84450	0	69.4737	43.9252	84	95	107	0	0	66.6667	72.3404	34.6154	52.7273	35.2941	41.1765	47.7273	50	69	15	48	47	52	55	51	68	44	46
78	88245	0	85.7143	57.1429	3	7	7	0	NA	100	75	33.3333	75	100	100	100	100	3	NA	3	4	3	4	5	8	1	5
78	88246	0	80.8511	75.6098	30	47	41	0	0	75	86.9565	61.9048	90	93.1034	96.7742	84.2105	91.6667	23	7	24	23	21	20	29	31	19	36
79	88552	0	95.8333	78.125	15	24	32	0	0	92.3077	100	56.25	100	100	92.8571	100	87.5	11	4	13	11	16	16	5	14	5	8
79	88553	60	100	90	5	6	10	66.6667	50	100	100	85.7143	100	100	100	100	100	3	2	3	3	7	3	7	6	3	4
80	91199	0	71.4286	57.1429	10	7	7	0	0	50	100	50	66.6667	85.7143	100	100	80	5	5	4	3	4	3	7	4	2	5
80	91200	0	92.8571	58.3333	25	28	24	0	0	100	83.3333	23.0769	100	92.3077	66.6667	71.4286	50	17	8	16	12	13	11	13	3	7	6
81	92309	0	86.2069	70.5882	28	29	34	0	0	91.6667	82.3529	33.3333	90.9091	100	93.75	75	100	16	12	12	17	12	22	14	16	8	12
81	92310	0	100	50	1	4	6	0	NA	100	100	25	100	100	NA	0	100	1	NA	2	2	4	2	1	NA	1	1
82	93506	0	95.3846	73.0769	58	65	52	0	0	93.75	96.9697	40.9091	96.6667	81.25	77.1429	96	90	32	26	32	33	22	30	32	35	25	30
82	93507	0	100	82.3529	11	20	17	0	0	100	100	50	100	83.3333	81.8182	77.7778	100	10	1	7	13	6	11	12	11	9	5
83	143503	23.5294	100	43.75	17	24	32	0	100	100	100	43.75	43.75	86.6667	71.4286	0	0	13	4	12	12	16	16	15	14	7	14
83	143504	32.3529	97.619	50	34	42	36	0	91.6667	94.4444	100	28.5714	63.6364	93.9394	59.0909	0	0	22	12	18	24	14	22	33	22	10	19
84	152219	0	94.1176	52.6316	11	17	19	0	NA	87.5	100	55.5556	50	85.7143	41.6667	0	0	11	NA	8	9	9	10	7	12	7	9
84	152220	16.6667	93.3333	48.5714	24	30	35	0	100	92.8571	93.75	63.1579	31.25	86.6667	41.1765	0	0	20	4	14	16	19	16	15	17	14	12
85	175727	23.0769	100	47.8261	26	43	46	0	85.7143	100	100	56.5217	39.1304	100	48.4848	0	0	19	7	19	24	23	23	19	33	15	16
85	175728	20	100	48	20	14	25	0	80	100	100	50	47.3684	94.7368	50	0	0	15	5	9	5	6	19	19	24	10	21
86	221126	100	0	75	4	1	4	100	NA	NA	0	100	50	0	100	100	75	4	NA	NA	1	2	2	3	2	1	4
86	221127	94.7368	39.3939	75	38	33	36	95.2381	94.1176	81.25	0	88.8889	61.1111	0	100	100	58.3333	21	17	16	17	18	18	12	15	11	24
87	336659	85	0	21.0526	20	20	19	100	0	0	0	0	40	0	47.0588	12.5	44.4444	17	3	11	9	9	10	18	17	8	9
87	336660	80	0	32.5	15	35	40	100	0	0	0	0	56.5217	0	64.7059	0	46.6667	12	3	21	14	17	23	23	17	5	15
88	341885	30.7692	90	62.5	13	10	8	0	80	0	100	33.3333	80	100	55.5556	75	66.6667	8	5	1	9	3	5	9	9	4	9
88	341886	12	86.4865	58.5366	25	37	41	0	60	83.3333	89.4737	71.4286	45	100	70	100	47.3684	20	5	18	19	21	20	19	20	8	19
89	354917	25	100	75	4	11	8	0	100	100	100	100	50	100	66.6667	NA	66.6667	3	1	3	8	4	4	4	3	NA	3
89	354918	41.1765	100	68.1818	17	22	22	0	100	100	100	91.6667	40	88.8889	100	100	37.5	10	7	11	11	12	10	9	9	9	8
90	403496	50	0	26.6667	6	9	15	60	0	0	0	50	11.1111	0	0	0	12.5	5	1	4	5	6	9	5	4	3	8
90	403497	50	0	29.7297	24	35	37	60	0	0	0	18.1818	46.6667	13.3333	0	11.1111	7.14286	20	4	17	18	22	15	15	16	9	14
91	415078	52.9412	0	38.7755	34	43	49	62.069	0	0	0	36.8421	40	11.1111	8.33333	25	19.2308	29	5	15	28	19	30	27	24	12	26
91	415079	61.5385	0	43.4783	13	13	23	72.7273	0	0	0	46.1538	40	0	36.3636	40	21.4286	11	2	7	6	13	10	10	11	5	14
92	416649	77.7778	0	56.4103	18	31	39	100	0	0	0	64.2857	52	100	44.4444	71.4286	45.4545	14	4	18	13	14	25	8	18	7	11
92	416650	100	0	50	2	12	14	100	NA	0	0	57.1429	42.8571	85.7143	42.8571	100	37.5	2	NA	4	8	7	7	7	7	6	8
93	423420	66.6667	0	30.7692	6	9	13	80	0	0	0	42.8571	16.6667	80	100	100	50	5	1	4	5	7	6	5	2	1	6
93	423421	71.4286	0	56.5217	14	27	23	83.3333	0	0	0	42.8571	77.7778	72.7273	41.1765	77.7778	44.4444	12	2	7	20	14	9	11	17	9	9
94	424403	78.9474	0	55.5556	19	16	18	100	0	0	0	71.4286	45.4545	100	57.1429	100	66.6667	15	4	10	6	7	11	11	14	6	9
94	424404	79.1667	5	42.8571	24	20	35	100	0	9.09091	0	35	53.3333	92.3077	46.6667	85.7143	80	19	5	11	9	20	15	13	15	21	5
95	441832	0	56	43.4783	11	25	23	0	NA	68.75	33.3333	66.6667	28.5714	23.0769	25	0	22.2222	11	NA	16	9	9	14	13	12	3	18
95	441833	12.5	59.2593	35	32	27	40	0	80	54.5455	62.5	50	12.5	40	12.5	20	21.0526	27	5	11	16	24	16	15	16	10	19
96	450309	75	0	41.6667	4	7	12	100	0	0	0	71.4286	0	75	75	100	0	3	1	5	2	7	5	8	4	4	4
96	450310	57.5758	0	26.7857	33	38	56	73.0769	0	0	0	46.875	0	59.0909	50	65.2174	0	26	7	23	15	32	24	22	18	23	20
97	492529	16.6667	100	85.7143	12	17	14	0	100	100	100	0	100	85.7143	100	0	100	10	2	10	7	2	12	7	10	8	10
97	492530	50	94.8718	54.2857	26	39	35	0	100	90	100	0	100	100	100	0	100	13	13	20	19	16	19	16	11	10	9
98	515267	24.3243	92.3077	47.2222	37	39	36	0	100	85	100	0	94.4444	100	50	7.14286	21.7391	28	9	20	19	18	18	16	32	14	23
98	515268	0	93.75	55.5556	7	16	18	0	NA	100	88.8889	0	100	100	42.8571	0	83.3333	7	NA	7	9	8	10	5	7	4	6
99	522672	22.2222	93.1034	57.1429	27	29	28	0	100	94.4444	90.9091	0	88.8889	75	64.7059	0	66.6667	21	6	18	11	10	18	12	17	5	15
99	522673	51.6129	100	60	31	30	35	0	94.1176	100	100	0	87.5	88.8889	50	0	45.4545	14	17	14	16	11	24	18	12	19	11
100	526442	14.2857	62.5	41.1765	21	32	34	16.6667	0	50	66.6667	33.3333	50	79.3103	88.8889	90	64.2857	18	3	8	24	18	16	29	18	10	28
100	526443	23.5294	72.7273	63.1579	17	11	19	23.0769	25	50	100	57.1429	80	87.5	85.7143	100	57.1429	13	4	6	5	14	5	8	7	10	7
101	571333	31.8182	97.561	92.8571	22	41	42	0	100	95	100	93.75	92.3077	100	87.5	85.7143	85.7143	15	7	20	21	16	26	18	16	7	14
101	571334	13.3333	100	94.1176	15	7	17	0	100	100	100	100	85.7143	100	100	80	87.5	13	2	5	2	10	7	5	2	5	8
102	584026	100	50	71.4286	19	20	21	100	100	0	90.9091	25	100	66.6667	22.2222	33.3333	26.3158	15	4	9	11	8	13	9	9	3	19
102	584027	100	39.1304	70.9677	14	23	31	100	100	0	81.8182	41.6667	89.4737	46.1538	14.2857	33.3333	41.1765	11	3	12	11	12	19	13	14	9	17
103	586817	20.8333	95.2381	94.1176	24	21	34	0	100	90	100	92.8571	95	91.6667	100	100	85	19	5	10	11	14	20	12	13	12	20
103	586818	19.4444	100	97.3684	36	54	38	0	100	100	100	100	93.75	80.9524	88.4615	83.3333	90.3226	29	7	21	33	22	16	21	26	24	31
104	601913	90	0	58.6207	20	29	29	100	0	0	0	100	0	88.8889	47.8261	55.5556	36.3636	18	2	12	17	17	12	9	23	9	11
104	601914	76.9231	5.88235	58.6207	13	17	29	90.9091	0	0	11.1111	100	0	100	66.6667	50	35.7143	11	2	8	9	17	12	10	15	4	14
105	644048	100	50	71.4286	13	8	7	100	NA	80	0	100	0	0	84.6154	33.3333	0	13	NA	5	3	5	2	12	13	3	9
105	644049	80	37.5	65.3846	15	16	26	92.3077	0	85.7143	0	100	35.7143	0	83.3333	33.3333	50	13	2	7	9	12	14	6	6	6	2
106	781292	100	50	68.4211	17	26	19	100	100	92.8571	0	100	57.1429	0	50	50	0	16	1	14	12	5	14	16	10	6	14
106	781293	95.6522	37.5	65	23	24	20	100	85.7143	100	0	100	36.3636	0	42.8571	40	0	16	7	9	15	9	11	10	7	5	13
107	784765	100	51.7857	80	35	56	50	100	100	100	0	100	66.6667	0	100	40	0	29	6	29	27	20	30	16	21	10	25
107	784766	97.2222	55.2632	75	36	38	48	100	90	95.4545	0	95.8333	54.1667	0	96.6667	61.5385	0	26	10	22	16	24	24	23	30	13	14
108	813649	4.7619	95	90.3226	21	40	31	0	50	100	89.4737	92.3077	88.8889	85.7143	77.7778	45.4545	100	19	2	21	19	13	18	21	18	11	24
108	813650	6.45161	97.9167	95.9184	31	48	49	0	100	100	95.4545	92	100	92.5926	45.1613	66.6667	86.9565	29	2	26	22	25	24	27	31	15	23
109	858431	76.9231	26.6667	73.3333	13	15	15	70	100	37.5	14.2857	85.7143	62.5	55.5556	30	0	42.8571	10	3	8	7	7	8	9	10	3	7
109	858432	91.6667	33.3333	80	12	18	10	90	100	0	42.8571	85.7143	66.6667	0	66.6667	66.6667	33.3333	10	2	4	14	7	3	5	6	6	12
110	867594	71.4286	20	60	14	15	15	83.3333	0	14.2857	25	71.4286	50	14.2857	62.5	0	25	12	2	7	8	7	8	7	8	6	8
110	867595	55.5556	6.45161	50	18	31	32	62.5	0	14.2857	0	43.75	56.25	0	20	28.5714	41.1765	16	2	14	17	16	16	11	10	7	17
111	867742	62.5	20	38.8889	8	10	18	83.3333	0	33.3333	14.2857	42.8571	36.3636	0	60	25	0	6	2	3	7	7	11	6	5	4	9
111	867743	61.1111	0	38.8889	18	36	18	68.75	0	0	0	42.8571	36.3636	7.14286	21.4286	0	20	16	2	15	21	7	11	14	14	9	10
112	874168	100	28.5714	77.7778	7	7	9	100	100	0	100	80	75	66.6667	66.6667	100	66.6667	4	3	5	2	5	4	9	3	1	6
112	874169	93.75	45.1613	75	16	31	16	93.3333	100	0	100	71.4286	77.7778	78.5714	92.8571	66.6667	91.6667	15	1	17	14	7	9	14	14	9	12
113	878324	30.4348	91.3043	59.6154	46	46	52	0	100	92.3077	90	50	69.2308	0	81.8182	0	96.4286	32	14	26	20	26	26	13	22	12	28
113	878325	16.6667	94.7368	66.6667	6	19	15	0	100	100	90.9091	60	70	0	90	0	100	5	1	8	11	5	10	10	10	5	9
114	882989	33.3333	100	76.1905	9	22	21	0	100	100	100	50	86.6667	0	100	0	100	6	3	13	9	6	15	6	7	4	17
114	882990	26.3158	94.1176	61.5385	19	17	26	0	100	100	90	38.4615	84.6154	0	90.9091	0	94.1176	14	5	7	10	13	13	10	11	9	17
115	889508	4.16667	92.5926	64.2857	24	27	14	0	50	92.3077	92.8571	50	75	0	60	0	90.9091	22	2	13	14	6	8	10	10	6	11
115	889509	0	75	28.5714	3	4	7	0	NA	0	100	20	50	0	100	NA	100	3	NA	1	3	5	2	7	1	NA	4
116	902322	100	0	35.2941	8	14	17	100	NA	0	0	100	0	0	0	25	46.1538	8	NA	4	10	6	11	5	10	8	13
116	902323	100	0	47.3684	13	18	19	100	100	0	0	90	0	0	0	62.5	50	12	1	6	12	10	9	14	8	8	12
117	916911	91.6667	0	51.4286	12	22	35	90	100	0	0	100	0	0	57.1429	45.4545	52.6316	10	2	9	13	18	17	6	7	11	19
117	916912	100	2.5641	48.8372	38	39	43	100	100	0	5.26316	95.4545	0	0	34.6154	28.5714	48.4848	21	17	20	19	22	21	22	26	21	33
118	925399	20.8333	100	96.5517	24	22	29	0	100	100	100	100	94.4444	86.6667	80	100	88.8889	19	5	14	8	11	18	15	10	7	18
118	925400	15.7895	96.5517	93.3333	19	29	30	0	100	93.3333	100	92.8571	93.75	90.9091	70.5882	76.9231	66.6667	16	3	15	14	14	16	11	17	13	18
119	930179	14.2857	100	85	7	15	20	0	50	100	100	90.9091	77.7778	0	50	100	50	5	2	8	7	11	9	6	10	5	10
119	930180	5.55556	94.7368	93.1034	18	19	29	0	100	100	85.7143	93.75	92.3077	0	43.75	60	40	17	1	12	7	16	13	6	16	5	15
120	948966	90.9091	0	81.25	11	21	16	83.3333	100	0	0	66.6667	100	0	50	100	54.5455	6	5	12	9	9	7	6	10	10	11
120	948967	90	0	66.6667	10	10	9	85.7143	100	0	0	50	80	0	40	100	42.8571	7	3	6	4	4	5	4	5	4	7
121	950921	100	60	66.6667	16	20	12	100	100	0	100	100	42.8571	0	66.6667	80	0	14	2	8	12	5	7	8	6	10	16
121	950922	93.3333	35.2941	89.6552	15	17	29	100	66.6667	0	85.7143	93.3333	85.7143	0	70	71.4286	0	12	3	10	7	15	14	9	10	7	9
122	952431	97.5	55.5556	74.4681	40	54	47	96.7742	100	0	100	93.1034	44.4444	0	100	100	48.4848	31	9	24	30	29	18	16	21	11	33
122	952432	92.8571	50	52.6316	14	22	19	100	66.6667	0	100	100	25	0	100	100	46.6667	11	3	11	11	7	12	11	6	6	15
123	952695	94.2478	52.0891	69.0236	226	359	297	95.2381	81.25	4	97.8261	92.2481	51.1905	2.11268	79.1667	77.4648	34.8837	210	16	175	184	129	168	142	216	142	215
123	952696	95.8621	53.9683	66.8203	145	252	217	96.0317	94.7368	6.72269	96.2406	96.6292	46.0938	7.27273	74.7899	70.1493	41.2281	126	19	119	133	89	128	110	119	67	114
124	976169	100	47.0588	87.0968	36	51	31	100	100	0	96	85.7143	88.2353	0	96.1538	100	96.4286	30	6	26	25	14	17	18	26	16	28
124	976170	100	50	95.6522	12	26	23	100	100	0	92.8571	100	91.6667	0	80	100	91.6667	9	3	12	14	11	12	15	10	9	12
125	976553	95.2381	36.8421	86.6667	21	19	30	88.8889	100	0	77.7778	78.5714	93.75	0	100	100	100	9	12	10	9	14	16	5	9	12	8
125	976554	100	50	95.2381	14	14	21	100	100	0	100	90.9091	100	0	100	100	100	9	5	7	7	11	10	9	7	5	7
126	983163	95	29.5455	61.5385	20	44	39	93.75	100	0	92.8571	94.7368	30	0	87.5	93.3333	37.5	16	4	30	14	19	20	19	8	15	16
126	983164	92	44.4444	67.6471	25	36	34	90.9091	100	0	88.8889	93.3333	47.3684	0	83.3333	88.8889	38.4615	22	3	18	18	15	19	10	18	9	13
127	983292	100	40	50	15	20	16	100	100	0	88.8889	71.4286	33.3333	0	92.3077	100	33.3333	9	6	11	9	7	9	9	13	6	12
127	983293	92.8571	41.6667	58.8235	14	12	17	90	100	0	100	75	53.8462	0	100	66.6667	66.6667	10	4	7	5	4	13	7	9	3	3
128	988889	92	45.098	54.386	75	51	57	97.1429	87.5	0	100	48.2759	60.7143	5.71429	30.5556	100	0	35	40	28	23	29	28	35	36	19	30
128	988890	100	50	75	5	6	8	100	100	0	100	66.6667	100	0	0	80	0	2	3	3	3	6	2	1	3	5	4
129	998368	95.4545	43.29	47.8431	198	231	255	95.7746	94.6429	0.78125	96.1165	41.2698	54.2636	1.0989	51.6393	89.1892	0.952381	142	56	128	103	126	129	91	122	74	105
129	998369	94.2623	53.6481	56.9378	122	233	209	93.6364	100	0	94.697	54.2169	58.7302	0	44.2623	95.1613	0	110	12	101	132	83	126	104	122	62	92
130	1014879	100	40.625	85.2941	22	32	34	100	100	0	92.8571	83.3333	87.5	0	84.6154	100	100	12	10	18	14	18	16	10	13	6	9
130	1014880	100	37.5	92.3077	9	16	13	100	100	0	100	100	87.5	0	66.6667	66.6667	NA	8	1	10	6	5	8	4	3	3	NA
131	1016185	96.6667	51.9231	95.4545	30	52	44	95.4545	100	100	0	95.2381	95.6522	94.7368	100	93.75	92.8571	22	8	27	25	21	23	19	31	16	14
131	1016186	100	43.75	90	21	16	20	100	100	87.5	0	100	83.3333	100	100	100	100	16	5	8	8	8	12	15	15	10	14
132	1018816	96.875	46.8085	90.2439	32	47	41	96.5517	100	0	88	86.9565	94.4444	0	64.7059	56	59.0909	29	3	22	25	23	18	22	17	25	22
132	1018817	100	45	96.2963	15	20	27	100	100	0	81.8182	93.3333	100	0	36.3636	30	77.7778	12	3	9	11	15	12	24	11	10	18
133	1042389	90	0	62.5	10	9	16	88.8889	100	0	0	62.5	62.5	0	0	33.3333	33.3333	9	1	5	4	8	8	4	3	6	9
133	1042390	91.3043	0	67.7966	23	34	59	90.9091	100	0	0	64	70.5882	0	0	31.25	41.1765	22	1	17	17	25	34	24	12	16	17
134	1096343	10.5263	66.6667	62.963	19	18	27	0	40	71.4286	63.6364	90	47.0588	72.7273	60	77.7778	100	14	5	7	11	10	17	11	10	9	6
134	1096344	15.3846	81.25	72.7273	13	16	11	0	66.6667	83.3333	80	57.1429	100	80	78.5714	80	83.3333	10	3	6	10	7	4	15	14	5	12
135	1111401	62.5	0	60	16	13	20	63.6364	60	0	0	40	66.6667	44.4444	33.3333	0	57.1429	11	5	7	6	5	15	9	9	7	7
135	1111402	52.9412	0	50	17	10	28	60	0	0	0	37.5	55	38.8889	25	25	28.5714	15	2	7	3	8	20	18	4	4	7
136	1113746	0	83.3333	40	5	6	5	0	NA	66.6667	100	NA	40	0	28.5714	0	40	5	NA	3	3	NA	5	5	7	1	5
136	1113747	0	88.8889	37.037	23	27	27	0	0	80	100	33.3333	40	0	37.5	37.5	36.3636	18	5	15	12	12	15	15	16	8	11
137	1115377	66.6667	0	43.4783	18	10	23	73.3333	33.3333	0	0	8.33333	81.8182	0	33.3333	40	30.7692	15	3	2	8	12	11	11	6	5	13
137	1115378	95.2381	0	68.4211	21	25	38	94.1176	100	0	0	35.7143	87.5	0	25	44.4444	33.3333	17	4	9	16	14	24	23	16	9	18
138	1123557	91.6667	0	30.7692	12	11	13	100	0	0	0	42.8571	16.6667	0	0	0	66.6667	11	1	6	5	7	6	9	1	4	9
138	1123558	88.8889	0	38.4615	9	9	13	87.5	100	0	0	20	50	0	33.3333	50	28.5714	8	1	1	8	5	8	7	6	6	7
139	1124506	3.0303	92.5926	42.1875	33	54	64	3.84615	0	89.6552	96	31.4286	55.1724	84.8485	38.2353	38.8889	93.3333	26	7	29	25	35	29	33	34	18	30
139	1124507	0	85.7143	25	10	7	8	0	NA	100	83.3333	50	0	50	30	0	50	10	NA	1	6	4	4	6	10	2	2
140	1182128	9.09091	54.5455	42.1053	11	22	19	0	100	85.7143	0	33.3333	50	100	35.7143	71.4286	82.3529	10	1	14	8	9	10	4	14	7	17
140	1182129	0	50	41.9355	26	30	31	0	0	78.9474	0	35.2941	50	70	38.4615	80	82.3529	21	5	19	11	17	14	10	13	15	17
141	1187931	0	56.25	50	10	16	8	0	0	90	0	50	50	0	100	0	100	6	4	10	6	4	4	7	4	2	2
141	1187932	0	61.5385	60	12	26	15	0	0	100	0	33.3333	77.7778	6.25	64.2857	53.8462	55.5556	7	5	16	10	6	9	16	14	13	9
142	1210051	70	21.4286	46.6667	10	14	15	66.6667	100	16.6667	25	50	40	20	0	22.2222	25	9	1	6	8	10	5	5	8	9	12
142	1210052	81.8182	33.3333	35.7143	11	21	28	87.5	66.6667	33.3333	33.3333	23.0769	46.6667	0	0	0	23.0769	8	3	9	12	13	15	6	15	5	13
143	1234037	0	40	20.8333	37	40	48	0	0	0	88.8889	0	52.6316	0	0	0	0	31	6	22	18	29	19	31	24	13	24
143	1234038	0	65.3846	12.5	13	26	24	0	NA	0	100	0	27.2727	0	10	0	5.55556	13	NA	9	17	13	11	15	10	8	18
144	1234196	4.54545	90.9091	61.2903	22	44	31	0	50	91.6667	90	45	90.9091	50	93.3333	31.5789	85	20	2	24	20	20	11	24	15	19	20
144	1234197	40	100	76	5	11	25	0	100	100	100	55.5556	87.5	87.5	100	88.8889	92.8571	3	2	5	6	9	16	16	11	9	14
145	1253465	24.1935	88	54.6667	62	75	75	2.08333	100	85	91.4286	52.9412	56.0976	79.4118	59.2593	54.5455	80	48	14	40	35	34	41	34	27	22	30
145	1253466	16.6667	83.3333	43.4783	6	12	23	0	100	66.6667	100	40	46.1538	50	18.1818	42.8571	100	5	1	6	6	10	13	6	11	7	9
146	1414661	0	51.4286	18.9189	21	35	37	0	0	94.7368	0	38.8889	0	0	43.75	0	0	17	4	19	16	18	19	16	16	22	17
146	1414662	0	40	28.5714	17	20	21	0	0	100	0	54.5455	0	0	43.75	0	0	12	5	8	12	11	10	6	16	9	12
147	1451518	5.88235	94.1176	85.7143	17	34	21	7.69231	0	94.1176	94.1176	100	62.5	0	75	100	28.5714	13	4	17	17	13	8	10	12	10	7
147	1451519	0	100	78.9474	12	11	19	0	0	100	100	90.9091	62.5	0	23.0769	85.7143	0	10	2	4	7	11	8	10	13	7	1
148	1497137	0	50	33.3333	16	24	30	0	0	0	100	30.7692	35.2941	0	11.1111	66.6667	42.8571	12	4	12	12	13	17	10	9	9	7
148	1497138	0	61.1111	42.8571	8	18	14	0	0	0	73.3333	50	25	7.14286	42.8571	75	25	7	1	3	15	10	4	14	7	4	8
149	1527272	28.5714	97.1429	60	28	35	40	0	88.8889	95	100	52.9412	65.2174	92.3077	100	45.4545	93.3333	19	9	20	15	17	23	13	15	11	15
149	1527273	60	100	71.4286	5	4	7	0	100	100	100	100	60	100	100	50	100	2	3	3	1	2	5	2	3	2	3
150	1532128	92.8571	42.8571	66.6667	14	14	15	90.9091	100	85.7143	0	100	54.5455	100	100	100	100	11	3	7	7	4	11	5	3	5	7
150	1532129	94.4444	48.3871	75.8621	18	31	29	92.3077	100	100	0	85.7143	66.6667	82.3529	73.3333	87.5	90.9091	13	5	15	16	14	15	17	15	8	11
151	1532553	13.3333	100	42.1053	15	9	19	0	50	100	100	27.2727	62.5	75	100	16.6667	75	11	4	4	5	11	8	8	3	6	4
151	1532554	19.0476	86.0465	44.8276	21	43	29	0	100	95.4545	76.1905	46.1538	43.75	44.4444	69.5652	45.4545	77.2727	17	4	22	21	13	16	18	23	11	22
152	1536371	16.6667	98.1481	97.7778	24	54	45	0	100	100	95.8333	100	95	88.2353	93.3333	100	95.4545	20	4	30	24	25	20	17	15	8	22
152	1536372	42.8571	93.75	91.6667	7	16	12	0	100	100	87.5	100	83.3333	83.3333	87.5	0	91.6667	4	3	8	8	6	6	6	8	1	12
153	1537838	25	94.1176	68.9655	20	34	29	0	100	93.3333	94.7368	42.8571	93.3333	100	100	88.8889	100	15	5	15	19	14	15	13	6	9	13
153	1537839	7.69231	94.4444	75	13	18	20	0	50	100	88.8889	61.5385	100	75	93.75	100	100	11	2	9	9	13	7	12	16	4	10
154	1538422	75	25	53.3333	4	20	15	0	100	9.09091	44.4444	62.5	42.8571	100	80	75	40	1	3	11	9	8	7	3	5	4	5
154	1538423	70.5882	23.8095	52.9412	17	21	17	91.6667	20	16.6667	33.3333	58.3333	40	60	77.7778	45.4545	62.5	12	5	12	9	12	5	5	9	11	8
155	1540430	25	95.6522	80.9524	4	23	21	0	100	91.6667	100	66.6667	86.6667	88.8889	88.4615	100	90	3	1	12	11	6	15	9	26	8	10
155	1540431	15.7895	96	72.2222	19	25	36	0	75	100	92.8571	47.3684	100	87.5	84.2105	81.8182	90.4762	15	4	11	14	19	17	16	19	11	21
156	1557268	100	50	76.1905	13	18	21	100	100	0	100	50	92.3077	100	88.8889	42.8571	100	10	3	9	9	8	13	5	9	7	12
156	1557269	100	52.381	82.6087	14	21	23	100	100	0	91.6667	66.6667	92.8571	90	75	62.5	100	10	4	9	12	9	14	10	8	8	11
157	1559398	100	51.7241	73.5294	26	29	34	100	100	0	93.75	52.9412	94.1176	88.4615	100	66.6667	92.3077	23	3	13	16	17	17	26	18	15	13
157	1559399	100	37.5	71.4286	18	24	21	100	100	0	90	53.8462	100	33.3333	88.2353	28.5714	100	15	3	14	10	13	8	3	17	7	10
158	1560111	89.4737	31.25	68	19	16	25	88.8889	100	0	100	46.6667	100	83.3333	75	0	71.4286	18	1	11	5	15	10	6	12	5	7
158	1560112	100	40.9091	90.9091	6	22	11	100	NA	0	100	100	83.3333	100	33.3333	0	50	6	NA	13	9	5	6	4	9	4	12
159	1574862	100	25	65.5172	17	16	29	100	100	0	80	40	92.8571	100	100	45.4545	100	15	2	11	5	15	14	8	8	11	8
159	1574863	100	41.6667	68.75	9	12	16	100	100	0	100	28.5714	100	100	100	50	100	6	3	7	5	7	9	6	3	8	4
160	1588799	90.2439	37.931	85	41	58	60	91.4286	83.3333	0	88	70.8333	94.4444	72.4138	73.913	39.1304	56.7568	35	6	33	25	24	36	29	23	23	37
160	1588800	86.1111	36.3636	50	36	44	46	87.0968	80	0	76.1905	26.9231	80	61.2903	85	38.4615	58.0645	31	5	23	21	26	20	31	20	13	31
161	1605606	100	33.3333	84	14	21	25	100	100	0	100	42.8571	100	100	100	40	90	13	1	14	7	7	18	8	6	5	10
161	1605607	96.9697	34.6154	83.3333	33	26	30	95.6522	100	0	90	64.2857	100	84.6154	95	50	100	23	10	16	10	14	16	13	20	8	23
162	1761032	91.1765	0	81.6327	34	40	49	86.3636	100	0	0	100	55	0	53.8462	94.1176	55	22	12	21	19	29	20	18	26	17	20
162	1761033	100	0	66.6667	14	13	9	100	100	0	0	100	40	0	55.5556	100	37.5	11	3	8	5	4	5	6	9	7	8
163	1779695	95.8333	45.4545	78.7879	24	22	33	100	83.3333	0	100	100	65	82.3529	54.5455	57.1429	92.8571	18	6	12	10	13	20	17	11	7	14
163	1779696	100	44.4444	71.4286	7	9	7	100	100	0	66.6667	80	50	100	66.6667	NA	66.6667	6	1	3	6	5	2	4	3	NA	3
164	1789426	98.1013	52.3077	96.789	158	195	218	97.8102	100	99	3.15789	97.5207	95.8763	98.2143	97.8571	94.2529	98.5075	137	21	100	95	121	97	112	140	87	134
164	1789427	98.4962	45.8333	93.6047	133	168	172	98.2301	100	91.6667	0	95.4545	92.4528	94.5055	97.561	96.2264	96.3415	113	20	84	84	66	106	91	82	53	82
165	1789796	95.6835	45.1777	66.3507	139	197	211	96.0938	90.9091	1.81818	100	94.8454	42.1053	99.0099	57.2917	51.4706	96	128	11	110	87	97	114	101	96	68	100
165	1789797	98.0392	38.0117	71.2575	102	171	167	97.7011	100	0	95.5882	100	46.6667	97.3684	47.5	52.7273	95.5056	87	15	103	68	77	90	76	80	55	89
166	1790065	98.4962	47.2527	72.6744	133	182	172	98.3193	100	0	98.8506	93.4211	56.25	100	54.5455	68.75	96.6667	119	14	95	87	76	96	108	110	64	90
166	1790072	98.8304	58.1633	77.686	171	196	242	98.6395	100	4.87805	96.4912	97.619	56.0345	97.4576	55.6391	60	96.3504	147	24	82	114	126	116	118	133	75	137
167	1797050	100	33.3333	88.8889	9	6	9	100	100	0	100	100	75	100	50	25	75	5	4	4	2	5	4	4	2	4	4
167	1797051	95.6522	35.1351	79.3103	23	37	29	93.3333	100	0	100	100	64.7059	81.8182	38.8889	28.5714	83.3333	15	8	24	13	12	17	11	18	7	6
168	1815946	0	90.9091	27.5862	20	22	29	0	0	90	91.6667	0	53.3333	76.9231	95.2381	0	20	19	1	10	12	14	15	13	21	2	15
168	1815947	0	75	40	4	8	5	0	NA	66.6667	100	0	66.6667	50	100	0	25	4	NA	6	2	2	3	2	3	2	4
169	1817431	0	92.8571	57.1429	12	14	14	0	0	100	75	0	72.7273	100	87.5	0	12.5	10	2	10	4	3	11	3	8	1	8
169	1817432	0	100	26.9231	8	16	26	0	0	100	100	0	58.3333	100	92.3077	25	72.7273	6	2	6	10	14	12	8	13	8	11
170	1836392	87.5	45.4545	66.6667	8	11	12	85.7143	100	0	100	100	42.8571	100	83.3333	50	66.6667	7	1	6	5	5	7	5	6	6	6
170	1836393	100	34.2857	73.3333	18	35	30	100	100	0	92.3077	100	33.3333	86.6667	38.4615	50	100	15	3	22	13	18	12	15	13	6	14
171	1845235	100	50	62.5	2	4	8	100	100	0	100	100	0	83.3333	0	100	50	1	1	2	2	5	3	6	3	2	2
171	1845236	100	32.1429	83.3333	19	28	24	100	100	0	90	90.9091	76.9231	92.8571	33.3333	33.3333	100	16	3	18	10	11	13	14	21	6	15
172	1850944	100	48.4848	76	28	33	25	100	100	0	94.1176	100	62.5	50	20	36.3636	65.3846	25	3	16	17	9	16	14	20	11	26
172	1850945	100	48	69.4444	17	25	36	100	100	7.14286	100	100	47.619	26.087	72.2222	57.1429	71.4286	11	6	14	11	15	21	23	18	7	21
173	1850952	0	97.0588	20	30	34	25	0	0	100	94.1176	0	33.3333	53.8462	60	50	0	27	3	17	17	10	15	13	20	12	25
173	1850953	0	95.6522	33.3333	14	23	30	0	0	100	90.9091	0	58.8235	45.8333	22.2222	57.1429	0	9	5	12	11	13	17	24	18	7	20
174	1854100	100	50	95.2381	18	32	21	100	100	5.88235	100	100	87.5	100	46.6667	100	100	14	4	17	15	13	8	12	15	7	18
174	1854101	100	57.1429	81.25	21	28	32	100	100	0	100	90.4762	63.6364	100	38.4615	100	100	14	7	12	16	21	11	15	13	12	15
175	1855763	0	100	31.0345	13	21	29	0	0	100	100	0	52.9412	0	44.4444	0	0	11	2	10	11	12	17	7	9	2	6
175	1855764	0	94.1176	35.2941	13	17	17	0	0	100	80	10	71.4286	0	18.1818	0	0	9	4	12	5	10	7	5	11	7	7
176	1857709	0	94.4444	28	16	18	25	0	0	90	100	0	53.8462	0	42.8571	0	0	12	4	10	8	12	13	11	7	3	7
176	1857710	0	100	26.3158	8	25	19	0	0	100	100	0	45.4545	0	55.5556	0	0	7	1	14	11	8	11	6	9	7	6
177	1858765	0	97.3684	32	14	38	25	0	0	93.75	100	0	72.7273	0	38.4615	0	0	10	4	16	22	14	11	12	13	4	14
177	1858766	0	100	33.3333	14	22	21	0	0	100	100	0	53.8462	0	55.5556	0	0	12	2	9	13	8	13	10	9	6	17
178	1866663	93.5484	0	72.2222	31	24	36	92.5926	100	0	0	94.4444	50	93.3333	64.2857	87.5	91.3043	27	4	10	14	18	18	15	14	8	23
178	1866664	96	0	81.8182	25	22	33	95	100	0	0	100	25	100	58.3333	100	100	20	5	12	10	25	8	14	12	6	22
179	1870132	93.75	44.4444	56.25	16	27	16	92.8571	100	7.14286	84.6154	100	12.5	88.8889	33.3333	100	100	14	2	14	13	8	8	9	6	11	9
179	1870133	100	58	72.4138	27	50	29	100	100	0	96.6667	100	50	95.2381	61.9048	95.6522	81.8182	22	5	20	30	13	16	21	21	23	22
180	1871535	100	0	67.6471	20	33	34	100	100	0	0	94.1176	41.1765	80	54.5455	83.3333	77.7778	16	4	17	16	17	17	20	11	6	9
180	1871536	97.7778	0	93.617	45	32	47	97.1429	100	0	0	100	75	87.8049	63.1579	81.8182	89.1892	35	10	17	15	35	12	41	19	22	37
181	1874717	100	35.2941	80	12	17	20	100	100	0	100	100	50	100	50	25	88.8889	11	1	11	6	12	8	5	8	4	9
181	1874718	100	49.2754	79.2453	49	69	53	100	100	0	94.4444	100	56	66.6667	28.9474	34.7826	80	39	10	33	36	28	25	24	38	23	35
182	1880739	100	50	88.2353	15	14	17	100	100	87.5	0	91.6667	80	66.6667	66.6667	100	100	9	6	8	6	12	5	9	3	1	3
182	1880740	92.8571	29.2683	92.6829	28	41	41	94.1176	90.9091	92.3077	0	89.4737	95.4545	76.4706	77.1429	50	80.9524	17	11	13	28	19	22	17	35	10	21
183	1927265	0	66.6667	12.5	15	24	24	0	0	58.3333	75	0	30	0	14.2857	20	0	14	1	12	12	14	10	11	7	5	14
183	1927266	0	61.1111	6.25	29	36	32	0	0	46.1538	69.5652	0	18.1818	0	23.8095	25	0	21	8	13	23	21	11	11	21	12	24
184	1939295	97.1429	41.3793	72.2222	35	29	36	95.6522	100	0	92.3077	94.4444	50	91.6667	90.9091	28.5714	90.9091	23	12	16	13	18	18	12	22	7	11
184	1939296	100	30	87.5	5	10	16	100	100	0	100	100	71.4286	100	100	66.6667	100	4	1	7	3	9	7	8	5	3	6
185	1958977	95.122	53.3333	67.7419	41	30	62	96.4286	92.3077	0	88.8889	84.6154	55.5556	40.7407	87.5	48.1481	74.0741	28	13	12	18	26	36	27	16	27	27
185	1958978	100	33.3333	57.1429	8	12	7	100	100	0	80	66.6667	0	100	50	0	66.6667	6	2	7	5	6	1	2	4	4	3
186	1959431	95.2381	42.5	66.6667	21	40	24	94.1176	100	0	94.4444	83.3333	50	50	86.6667	64.2857	100	17	4	22	18	12	12	14	15	14	15
186	1959432	88.8889	44.186	80	18	43	35	87.5	100	0	100	85.7143	71.4286	70.5882	92.8571	53.3333	100	16	2	24	19	21	14	17	14	15	18
187	1962046	92.3077	0	70	13	8	10	90.9091	100	0	0	100	40	100	33.3333	25	83.3333	11	2	4	4	5	5	2	3	4	6
187	1962047	83.3333	0	71.4286	12	13	21	90.9091	0	0	0	90.9091	50	100	62.5	50	92.8571	11	1	8	5	11	10	14	8	8	14
188	1976667	93.75	5.55556	57.1429	16	18	28	100	85.7143	0	14.2857	93.3333	15.3846	100	50	33.3333	80	9	7	11	7	15	13	9	10	3	5
188	1976668	90.9091	0	84.6154	11	20	26	100	75	0	0	92.8571	75	100	14.2857	12.5	81.8182	7	4	9	11	14	12	11	7	8	11
189	2065666	27.2727	92.5	91.8919	22	40	37	0	100	100	88.8889	88.2353	95	73.3333	70.5882	44.4444	73.3333	16	6	13	27	17	20	15	17	9	15
189	2065667	20	94.1176	73.0769	15	34	26	0	100	100	90.9091	71.4286	75	70	28.5714	75	72.7273	12	3	12	22	14	12	10	7	4	11
190	2087561	22.2222	89.4737	75	9	19	24	0	100	81.8182	100	88.8889	66.6667	81.8182	95.2381	100	82.3529	7	2	11	8	9	15	11	21	3	17
190	2087562	24.3243	90.3226	82.9268	37	31	41	0	90	100	85.7143	100	69.5652	90.9091	85.7143	93.75	82.6087	27	10	10	21	18	23	22	21	16	23
191	2132582	0	94.1176	91.4286	15	17	35	0	NA	100	91.6667	93.75	89.4737	84.6154	84.6154	50	90	15	NA	5	12	16	19	13	13	10	10
191	2132583	16.6667	100	95.8333	18	21	24	0	100	100	100	100	90	90.9091	50	58.3333	61.5385	15	3	13	8	14	10	11	8	12	13
192	2157787	96	52.1127	89.3333	50	71	75	97.1429	93.3333	100	2.85714	92.5926	87.5	71.4286	90.2439	86.6667	92.8571	35	15	36	35	27	48	42	41	30	42
192	2157788	100	55.5556	96.6667	13	18	30	100	100	100	0	94.1176	100	71.4286	95	88.8889	88.8889	11	2	10	8	17	13	14	20	9	9
193	2166671	100	57.1429	97.0588	45	84	68	100	100	97.561	18.6047	95.3488	100	90.9091	96.5517	94.7368	90.6977	34	11	41	43	43	25	33	29	19	43
193	2166672	100	48.6486	97.0588	19	37	34	100	100	94.7368	0	93.3333	100	94.1176	100	100	100	17	2	19	18	15	19	17	12	17	29
194	2263507	0	78.9474	33.3333	17	19	15	0	0	70	88.8889	0	45.4545	0	0	0	0	15	2	10	9	4	11	6	7	8	14
194	2263508	0	72	5.88235	8	25	17	0	0	66.6667	76.9231	0	12.5	0	25	0	0	7	1	12	13	9	8	4	12	3	10
195	2347525	17.6471	96	92.3077	17	25	26	0	100	100	92.3077	92.8571	91.6667	86.3636	91.3043	100	100	14	3	12	13	14	12	22	23	7	20
195	2347526	16.6667	100	95.8333	12	27	24	0	66.6667	100	100	93.75	100	76.9231	100	100	95	9	3	8	19	16	8	13	11	5	20
196	2391346	76.9231	22.2222	40	13	18	10	80	66.6667	23.0769	20	50	25	0	7.69231	36.3636	25	10	3	13	5	6	4	7	13	11	8
196	2391347	62.5	20	47.0588	8	10	17	71.4286	0	20	20	58.3333	20	14.2857	33.3333	16.6667	0	7	1	5	5	12	5	7	3	6	2
197	2473004	86.3636	44.4444	69.5652	22	27	23	89.4737	66.6667	80	0	66.6667	72.7273	22.2222	90.9091	50	41.6667	19	3	15	12	12	11	9	11	8	12
197	2473005	90.4762	46.1538	80.6452	21	39	31	89.4737	100	77.2727	5.88235	92.8571	70.5882	30	40	42.8571	50	19	2	22	17	14	17	10	15	7	16
198	2473924	78.5714	0	45.4545	14	10	11	100	0	0	0	0	83.3333	0	20	0	0	11	3	3	7	5	6	9	5	2	8
198	2473925	66.6667	0	58.0645	18	33	31	100	0	0	0	0	100	0	0	0	0	12	6	13	20	13	18	17	11	9	8
199	2497010	78.9474	0	65.5172	19	20	29	100	0	0	0	0	100	0	0	0	0	15	4	9	11	10	19	18	14	6	9
199	2497011	72.5	2.85714	52.9412	40	35	34	90.625	0	6.25	0	0	94.7368	0	0	0	0	32	8	16	19	15	19	18	14	9	19
200	3088182	0	46.1538	26.6667	9	26	15	0	0	66.6667	18.1818	11.1111	50	36.3636	50	0	22.2222	8	1	15	11	9	6	11	4	11	9
200	3088183	0	70	35.5932	40	50	59	0	0	72.7273	67.8571	39.2857	32.2581	70	16.6667	0	42.3077	37	3	22	28	28	31	20	24	18	26
201	3102208	0	94.1176	76.3158	36	34	38	0	0	88.2353	100	100	57.1429	0	100	57.1429	21.4286	28	8	17	17	17	21	12	19	14	14
201	3102209	0	92	64.7059	19	25	34	0	0	90	93.3333	100	45.4545	0	95.6522	50	47.0588	15	4	10	15	12	22	22	23	10	17
202	3102657	0	66.6667	57.1429	20	30	21	0	0	58.8235	76.9231	41.6667	77.7778	0	37.5	50	25	15	5	17	13	12	9	5	16	12	12
202	3102658	0	85.7143	50	4	7	6	0	NA	75	100	50	50	0	50	66.6667	100	4	NA	4	3	2	4	2	6	3	2
203	3215556	94.1176	35.7143	86.6667	17	14	15	90.9091	100	100	0	100	33.3333	100	100	75	100	11	6	5	9	12	3	6	4	4	4
203	3215557	85.7143	37.5	72.7273	7	8	11	83.3333	100	100	0	100	40	100	100	100	100	6	1	3	5	6	5	2	1	3	5
204	3415575	22.2222	100	36.3636	9	11	11	14.2857	50	100	100	20	50	75	33.3333	33.3333	50	7	2	4	7	5	6	4	3	6	2
204	3415614	25	77.7778	63.3333	16	27	30	0	66.6667	78.5714	76.9231	80	46.6667	38.8889	50	66.6667	35.2941	10	6	14	13	15	15	18	24	6	17
205	3415963	42.8571	86.6667	80	14	15	15	33.3333	100	100	77.7778	85.7143	75	100	50	37.5	55.5556	12	2	6	9	7	8	5	6	8	9
205	3415978	46.1538	90.3226	73.0769	26	31	26	36.8421	71.4286	85.7143	100	55.5556	82.3529	53.3333	50	75	60	19	7	21	10	9	17	15	10	4	15
206	3424161	75	0	66.6667	4	1	9	100	0	NA	0	83.3333	33.3333	71.4286	0	NA	20	3	1	NA	1	6	3	7	2	NA	5
206	3424162	91.4286	33.3333	46.1538	35	27	26	85.7143	100	41.1765	20	40	50	47.3684	77.7778	100	53.3333	21	14	17	10	10	16	19	9	1	15
207	3463823	21.4286	80	40	14	10	5	18.1818	33.3333	77.7778	100	50	33.3333	71.4286	20	100	40	11	3	9	1	2	3	7	5	2	5
207	3463824	7.14286	64.7059	55	14	17	20	8.33333	0	55.5556	75	41.6667	75	63.6364	81.25	50	38.4615	12	2	9	8	12	8	11	16	2	13
208	3481687	95	39.1304	70.3704	20	23	27	92.3077	100	31.25	57.1429	81.8182	62.5	100	83.3333	50	77.7778	13	7	16	7	11	16	7	6	8	9
208	3481688	91.6667	44	67.8571	24	25	28	95.2381	66.6667	50	40	75	62.5	92.3077	69.2308	75	64.7059	21	3	10	15	12	16	13	13	8	17
209	3486427	100	45.4545	85.7143	16	22	21	100	100	46.1538	44.4444	88.8889	83.3333	100	90	100	92.8571	13	3	13	9	9	12	7	10	8	14
209	3486428	96.875	45	87.0968	32	20	31	95	100	25	75	94.7368	75	87.5	100	84.6154	92.3077	20	12	12	8	19	12	16	10	13	13
210	3847192	97.1429	46.875	96.9697	35	32	33	93.3333	100	0	100	94.1176	100	68.75	81.8182	77.7778	85.7143	15	20	17	15	17	16	16	11	9	14
210	3847193	100	58.8235	95	20	17	20	100	100	0	90.9091	100	88.8889	83.3333	62.5	37.5	70	15	5	6	11	11	9	12	8	8	10
211	3972118	100	50	62.5	15	12	16	100	100	57.1429	40	55.5556	71.4286	80	66.6667	100	100	11	4	7	5	9	7	5	6	6	5
211	3972137	57.1429	10	33.3333	14	10	15	60	50	14.2857	0	11.1111	66.6667	87.5	80	85.7143	66.6667	10	4	7	3	9	6	8	5	7	6
212	4037567	17.6471	100	46.1538	17	20	13	0	100	100	100	50	40	93.3333	61.5385	100	100	14	3	13	7	8	5	15	13	9	11
212	4037568	13.0435	96.5517	39.5833	23	29	48	0	100	94.4444	100	44	34.7826	88.2353	47.3684	100	94.7368	20	3	18	11	25	23	17	19	13	19
213	4047216	33.3333	93.3333	72.7273	3	15	11	0	100	100	88.8889	25	100	100	100	100	100	2	1	6	9	4	7	7	11	4	8
213	4047217	10	96.1538	72.7273	20	26	22	0	100	94.1176	100	37.5	92.8571	100	71.4286	100	76.9231	18	2	17	9	8	14	9	7	4	13
214	4049839	25	86.6667	85.7143	12	15	14	0	100	100	80	0	92.3077	7.14286	33.3333	80	0	9	3	5	10	1	13	14	9	5	3
214	4049840	23.5294	81.0811	50.9434	34	37	53	0	100	86.3636	73.3333	26.6667	82.6087	16.6667	11.7647	35.7143	35.2941	26	8	22	15	30	23	12	17	14	17
215	4065495	96.2963	53.8462	90.9091	27	26	22	95.2381	100	0	93.3333	100	80	100	85.7143	44.4444	84.6154	21	6	11	15	12	10	16	7	9	13
215	4065496	100	53.8462	94.7368	16	26	19	100	100	0	93.3333	100	90	90.9091	55.5556	16.6667	100	10	6	11	15	9	10	11	9	6	11
216	4110036	0	42.1053	10.5263	20	19	19	0	0	0	80	25	0	100	50	100	88.8889	10	10	9	10	8	11	11	10	5	9
216	4110037	0	46.1538	11.7647	9	13	17	0	NA	0	75	33.3333	0	75	28.5714	100	80	9	NA	5	8	6	11	8	7	3	10
217	4115027	92.3077	28.5714	68.4211	26	14	38	94.7368	85.7143	100	0	70.5882	66.6667	100	60	16.6667	87.5	19	7	4	10	17	21	10	15	6	16
217	4115028	77.7778	36.3636	53.3333	9	11	15	87.5	0	80	0	80	40	100	66.6667	33.3333	77.7778	8	1	5	6	5	10	6	9	3	9
218	4262530	14.2857	93.1034	73.0769	21	29	26	0	100	92.3077	93.75	100	36.3636	93.3333	42.8571	83.3333	0	18	3	13	16	15	11	15	14	6	11
218	4262531	37.5	100	60.7143	16	33	28	0	100	100	100	100	15.3846	94.7368	72.7273	91.6667	0	10	6	17	16	15	13	19	11	12	17
219	4710591	43.75	86.9565	64.7059	16	23	17	36.3636	60	90.9091	83.3333	75	55.5556	75	50	0	50	11	5	11	12	8	9	12	12	7	4
219	4710608	0	73.3333	20	6	15	10	0	0	66.6667	77.7778	0	40	60	42.8571	40	66.6667	5	1	6	9	5	5	5	7	5	3
220	4710855	15.3846	60	22.2222	26	20	36	16.6667	0	80	40	18.75	25	61.1111	7.69231	0	40	24	2	10	10	16	20	18	13	13	20
220	4710856	20	63.1579	22.7273	15	19	22	15.3846	50	75	54.5455	9.09091	36.3636	50	50	18.1818	66.6667	13	2	8	11	11	11	12	10	11	15
221	4710966	16.6667	68.75	42.1053	18	16	19	21.4286	0	50	75	50	38.4615	21.4286	0	33.3333	23.0769	14	4	4	12	6	13	14	2	6	13
221	4710967	25	93.75	36.3636	8	16	11	25	25	100	87.5	16.6667	60	27.2727	42.8571	0	16.6667	4	4	8	8	6	5	11	7	4	12
222	4711393	100	0	42.8571	20	27	14	100	100	0	0	50	37.5	77.7778	40	100	90	18	2	8	19	6	8	9	10	5	20
222	4711394	95.2381	0	29.1667	21	18	24	100	85.7143	0	0	23.0769	36.3636	89.4737	28.5714	100	86.6667	14	7	10	8	13	11	19	7	5	15
223	4711791	52.381	0	27.2727	21	23	44	68.75	0	0	0	36.8421	20	84.6154	45	91.6667	70	16	5	10	13	19	25	13	20	12	20
223	4711792	73.5294	0	27.5	34	45	40	76.6667	50	0	0	16.6667	36.3636	95.2381	37.5	80	74.0741	30	4	25	20	18	22	21	16	20	27
224	4751045	0	45.4545	10	12	11	20	0	0	0	100	20	0	0	45.4545	85.7143	0	8	4	6	5	10	10	9	11	7	4
224	4751046	0	64.2857	23.3333	20	28	30	0	0	0	100	46.1538	5.88235	8.33333	62.5	92.8571	60	18	2	10	18	13	17	12	16	14	15
225	4903243	100	0	50	7	13	18	100	100	0	0	75	0	0	50	0	100	3	4	3	10	12	6	8	10	5	8
225	4903244	92	3.125	31.7073	25	32	41	90.4762	100	0	5.55556	56.5217	0	5.55556	31.8182	0	100	21	4	14	18	23	18	18	22	12	18
226	4909785	100	53.1915	69.2308	62	47	52	100	100	96.1538	0	40	96.2963	100	57.1429	38.8889	84.6154	41	21	26	21	25	27	32	28	18	26
226	4909786	88.8889	45	70.5882	9	20	17	87.5	100	90	0	33.3333	90.9091	100	85.7143	14.2857	88.8889	8	1	10	10	6	11	13	7	7	9
227	4916935	96.5517	52.1739	72.3404	29	23	47	94.1176	100	84.6154	10	43.4783	100	100	92.3077	83.3333	90.9091	17	12	13	10	23	24	9	13	6	11
227	4916936	100	41.6667	81.8182	6	12	11	100	NA	100	0	66.6667	87.5	100	80	50	100	6	NA	5	7	3	8	8	5	4	5
228	4923090	100	52.9412	69.4444	28	34	36	100	100	6.25	94.4444	88.8889	50	0	62.5	86.6667	92.8571	24	4	16	18	18	18	9	16	15	28
228	4923091	100	48	80.9524	12	25	21	100	100	7.14286	100	100	60	0	44.4444	91.6667	100	7	5	14	11	11	10	14	18	12	12
229	4931513	85	40.7407	72.5	20	27	40	81.25	100	0	91.6667	95	50	0	66.6667	64.7059	100	16	4	15	12	20	20	19	15	17	22
229	4931514	95.6522	51.4286	72.7273	23	35	22	94.7368	100	0	100	100	53.8462	0	81.8182	80	95.2381	19	4	17	18	9	13	17	11	10	21
230	5008739	33.3333	100	80	3	1	5	0	100	NA	100	100	66.6667	40	100	NA	75	2	1	NA	1	2	3	5	5	NA	4
230	5008756	13.1579	57.1429	52.7273	38	42	55	0	45.4545	52.9412	60	72.7273	39.3939	22.2222	52	30	62.5	27	11	17	25	22	33	27	25	20	32
231	5080086	23.0769	91.6667	43.6364	52	36	55	0	100	88.8889	94.4444	32	53.3333	96.9697	30.7692	41.6667	41.1765	40	12	18	18	25	30	33	26	12	17
231	5080087	50	96.4286	70.3704	14	28	27	12.5	100	100	95.2381	81.25	54.5455	82.6087	33.3333	50	37.5	8	6	7	21	16	11	23	9	4	8
232	5122494	80	12.5	53.8462	5	16	13	75	100	33.3333	0	62.5	40	0	0	33.3333	50	4	1	6	10	8	5	4	4	3	6
232	5122495	61.9048	15.7895	46.6667	21	38	30	50	77.7778	46.1538	0	50	42.8571	0	42.1053	14.2857	30.7692	12	9	13	25	16	14	13	19	14	13
233	5132636	17.5	94.4444	45.7627	40	54	59	0	87.5	92.3077	96.4286	45.8333	45.7143	0	96.2963	36.3636	86.9565	32	8	26	28	24	35	29	27	11	23
233	5132637	18.1818	100	38.4615	11	20	13	0	100	100	100	44.4444	25	0	100	40	100	9	2	11	9	9	4	7	9	10	13
234	5132784	77.7778	0	42.1053	18	16	19	100	0	0	0	33.3333	46.1538	88.8889	16.6667	37.5	16.6667	14	4	10	6	6	13	18	6	8	6
234	5132785	80	0	44	10	30	25	100	0	0	0	46.1538	41.6667	76.4706	9.09091	50	0	8	2	14	16	13	12	17	11	8	10
235	5166335	0	81.4815	34.375	25	27	32	0	0	83.3333	80	64.7059	0	100	71.4286	75	66.6667	17	8	12	15	17	15	10	7	4	18
235	5166336	0	100	61.5385	8	8	13	0	0	100	100	88.8889	0	83.3333	0	100	100	6	2	6	2	9	4	6	1	4	3
236	5191105	13.3333	86.2069	78.125	15	29	32	0	100	87.5	84.6154	85.7143	72.2222	77.7778	80	100	77.7778	13	2	16	13	14	18	9	15	7	9
236	5191106	25	100	78.2609	12	26	23	0	60	100	100	84.6154	70	87.5	77.7778	80	100	7	5	11	15	13	10	8	9	5	8
237	5194016	13.3333	92.1053	45.8333	15	38	24	0	66.6667	85.7143	100	75	16.6667	0	94.7368	16.6667	100	12	3	21	17	12	12	16	19	6	13
237	5194017	15.3846	76.9231	58.3333	13	13	12	0	100	60	87.5	60	50	0	72.7273	75	87.5	11	2	5	8	10	2	10	11	4	8
238	5246014	69.5652	0	40.5405	23	42	37	84.2105	0	0	0	0	83.3333	43.75	60	36.3636	29.4118	19	4	25	17	19	18	16	10	11	17
238	5246015	71.4286	0	43.2432	28	33	37	83.3333	0	0	0	0	84.2105	53.3333	76.4706	28.5714	40	24	4	16	17	18	19	15	17	7	10
239	5266848	92.3077	50	70.5882	13	18	17	90.9091	100	100	0	75	66.6667	57.1429	60	66.6667	87.5	11	2	9	9	8	9	7	10	6	8
239	5266849	94.5946	48.9796	90.3226	37	49	31	96.4286	88.8889	92.3077	0	91.6667	89.4737	43.75	71.4286	75	81.25	28	9	26	23	12	19	16	21	8	16
240	5354753	0	69.5652	31.5789	19	23	19	0	0	100	0	0	60	0	25	50	0	11	8	16	7	9	10	9	12	6	13
240	5354754	0	83.3333	33.3333	5	12	6	0	0	100	0	0	50	0	75	16.6667	0	2	3	10	2	2	4	2	4	6	2
241	5356739	0	43.2432	31.25	21	37	32	0	0	94.1176	0	0	66.6667	0	38.4615	46.1538	0	18	3	17	20	17	15	9	13	13	13
241	5356740	0	51.6667	22.2222	46	60	36	0	0	96.875	0	0	44.4444	0	52.9412	53.8462	0	26	20	32	28	18	18	20	17	13	26
242	5466094	0	95.4545	23.0769	21	44	39	0	0	92	100	0	52.9412	57.1429	60	0	0	15	6	25	19	22	17	14	15	13	17
242	5466095	0	92.8571	19.0476	18	28	21	0	0	87.5	100	0	40	73.3333	72.7273	0	0	12	6	16	12	11	10	15	11	10	12
243	5526235	87.5	7.14286	52.6316	16	14	19	81.8182	100	11.1111	0	83.3333	38.4615	0	25	50	60	11	5	9	5	6	13	10	8	6	5
243	5526236	93.75	0	68.2927	32	45	41	95.8333	87.5	0	0	66.6667	70	0	39.1304	41.6667	55	24	8	22	23	21	20	24	23	12	20
244	5526708	95	0	50	20	15	22	100	87.5	0	0	66.6667	30	0	50	50	66.6667	12	8	5	10	12	10	10	6	2	6
244	5526709	97.4359	0	57.6923	39	30	26	95.8333	100	0	0	53.3333	63.6364	7.69231	42.8571	53.3333	54.5455	24	15	15	15	15	11	13	14	15	11
245	5530496	63.6364	14.2857	42.8571	11	7	21	83.3333	40	0	50	40	45.4545	0	33.3333	40	25	6	5	5	2	10	11	5	9	5	4
245	5530497	95.2381	3.22581	57.8947	21	31	19	92.8571	100	6.25	0	52.9412	100	0	43.75	20	28.5714	14	7	16	15	17	2	7	16	10	21
246	5531702	78.5714	5.26316	45.4545	14	19	33	90.9091	33.3333	0	8.33333	44.4444	46.6667	0	27.2727	50	23.0769	11	3	7	12	18	15	7	11	12	13
246	5531703	90.2439	5.26316	36.3636	41	38	44	85.1852	100	9.52381	0	42.8571	33.3333	0	45.8333	50	56	27	14	21	17	14	30	24	24	12	25
247	5604635	93.75	27.2727	82.7586	16	11	29	100	85.7143	0	75	93.75	69.2308	27.2727	33.3333	80	10	9	7	7	4	16	13	11	15	5	10
247	5604636	92.3077	33.3333	86.6667	13	18	30	88.8889	100	0	85.7143	87.5	85.7143	54.5455	33.3333	66.6667	37.5	9	4	11	7	16	14	11	9	6	8
248	5616944	19.0476	96.1538	68.1818	21	26	22	0	100	100	94.1176	80	58.3333	76.9231	0	90	100	17	4	9	17	10	12	13	20	10	12
248	5616945	42.3077	97.0588	75	26	34	24	6.25	100	94.4444	100	100	50	85.7143	0	100	100	16	10	18	16	12	12	14	21	8	6
249	5619254	95.8333	44.8276	72	24	29	25	92.3077	100	0	100	100	53.3333	83.3333	88.2353	54.5455	31.5789	13	11	16	13	10	15	18	17	11	19
249	5619255	100	45.4545	63.1579	16	11	19	100	100	0	100	66.6667	57.1429	100	85.7143	40	25	13	3	6	5	12	7	4	7	5	4
250	5623071	0	48.2143	41.0714	48	56	56	0	0	93.1034	0	28.5714	48.5714	64.7059	0	86.6667	78.9474	26	22	29	27	21	35	34	21	15	19
250	5623072	0	66.6667	45.4545	3	6	11	0	0	100	0	37.5	66.6667	100	0	100	100	1	2	4	2	8	3	2	6	1	2
251	5672422	54.5455	96.2963	90.9091	22	27	11	75	0	100	90.9091	85.7143	100	57.1429	57.1429	80	60	16	6	16	11	7	4	7	7	5	15
251	5672423	60	100	88.8889	20	27	18	80	0	100	100	90.9091	85.7143	57.1429	50	50	72.7273	15	5	10	17	11	7	7	8	4	11
252	5715958	40	89.4737	66.6667	10	19	18	42.8571	33.3333	100	81.8182	50	80	66.6667	81.8182	33.3333	55.5556	7	3	8	11	8	10	12	11	3	9
252	5715996	35	75	60.4167	20	28	48	35.2941	33.3333	91.6667	62.5	50	67.8571	11.5385	35	27.2727	63.6364	17	3	12	16	20	28	26	20	11	11
253	5846888	94.4444	0	20	18	17	10	91.6667	100	0	0	0	50	0	28.5714	50	100	12	6	9	8	6	4	8	7	4	2
253	5846889	90.9091	0	23.5294	33	42	34	86.6667	94.4444	0	0	0	40	0	46.6667	57.1429	66.6667	15	18	16	26	14	20	11	15	7	18
254	5853136	0	90	62.5	10	10	8	0	0	85.7143	100	57.1429	100	50	66.6667	66.6667	33.3333	7	3	7	3	7	1	4	3	3	3
254	5853137	0	84.6154	57.1429	13	13	21	0	0	80	87.5	83.3333	46.6667	50	33.3333	60	50	7	6	5	8	6	15	8	3	5	10
255	5904350	100	60	75	5	5	4	100	100	0	100	100	66.6667	100	40	75	100	2	3	2	3	1	3	1	5	4	1
255	5904351	92.6829	37.037	76.7442	41	27	43	100	83.3333	0	90.9091	78.9474	75	90.4762	50	36.3636	100	23	18	16	11	19	24	21	16	11	15
256	5909380	0	42.8571	18.4211	22	21	38	0	0	81.8182	0	0	41.1765	0	40	16.6667	0	16	6	11	10	21	17	10	10	6	9
256	5909381	0	40.5405	10.9091	29	37	55	0	0	78.9474	0	0	26.087	12.5	81.8182	25	0	17	12	19	18	32	23	8	22	8	16
257	6048672	88.4615	41.6667	62.069	26	24	29	82.3529	100	0	90.9091	41.6667	76.4706	85.7143	90.4762	80	83.3333	17	9	13	11	12	17	7	21	5	18
257	6048673	94.7368	44.1176	69.4444	19	34	36	91.6667	100	0	100	55.5556	83.3333	56.25	91.6667	100	90.9091	12	7	19	15	18	18	16	24	14	11
258	6048681	0	50	23.0769	26	24	26	0	0	100	0	54.5455	0	0	45	60	0	18	8	12	12	11	15	8	20	5	16
258	6048682	0	42.8571	18.1818	19	35	33	0	0	88.2353	0	37.5	0	0	45	53.3333	0	11	8	17	18	16	17	15	20	15	11
259	6116750	0	49.0566	47.3684	40	53	57	0	0	0	81.25	96.4286	0	0	79.4118	88.2353	47.2222	28	12	21	32	28	29	31	34	17	36
259	6116751	0	50	43.1818	25	32	44	0	0	0	94.1176	100	0	0	91.3043	100	33.3333	19	6	15	17	19	25	15	23	15	24
260	6122942	95.6522	42.4242	75.7576	23	33	33	93.3333	100	87.5	0	56.25	94.1176	64.2857	93.3333	37.5	77.7778	15	8	16	17	16	17	14	15	8	18
260	6122943	100	38.4615	80	7	13	10	100	100	83.3333	0	33.3333	100	50	100	0	81.8182	6	1	6	7	3	7	6	7	2	11
261	6123575	100	51.7241	63.6364	36	29	33	100	100	93.75	0	60.8696	70	65	87.5	100	84.2105	18	18	16	13	23	10	20	8	1	19
261	6123576	85.7143	31.25	50	7	16	10	83.3333	100	83.3333	0	0	71.4286	100	83.3333	25	100	6	1	6	10	3	7	4	6	4	6
262	6181343	0	50	48	21	20	25	0	0	90.9091	0	36.3636	57.1429	46.6667	64.2857	0	62.5	18	3	11	9	11	14	15	14	4	16
262	6181344	0	52.381	50	23	21	16	0	0	100	0	50	50	46.6667	12.5	0	66.6667	18	5	11	10	10	6	15	8	7	12
263	6210778	0	61.5385	33.3333	4	13	12	0	0	100	0	57.1429	0	0	0	66.6667	33.3333	3	1	8	5	7	5	2	1	3	6
263	6210779	1.42857	42.8571	34.1176	70	63	85	2.38095	0	86.2069	5.88235	61.7021	0	0	34.4828	68.1818	47.8261	42	28	29	34	47	38	28	29	22	23
264	6216762	0	80	41.6667	7	15	12	0	0	85.7143	75	42.8571	40	60	54.5455	0	70	4	3	7	8	7	5	5	11	1	10
264	6216763	0	85.7143	57.6923	25	21	26	0	0	100	75	68.75	40	25	40	25	55.5556	15	10	9	12	16	10	8	5	4	9
265	6264139	90	0	80	10	5	5	87.5	100	0	0	100	50	57.1429	20	100	100	8	2	3	2	3	2	7	5	2	4
265	6264140	90	0	71.4286	20	22	28	84.6154	100	0	0	53.8462	86.6667	44.4444	22.2222	100	85.7143	13	7	10	12	13	15	9	9	5	14
266	6319504	0	57.5758	38.2353	29	33	34	0	0	0	95	86.6667	0	44.4444	36.8421	50	0	11	18	13	20	15	19	18	19	10	5
266	6319505	0	43.75	28.5714	12	16	14	0	0	0	100	100	0	42.8571	37.5	33.3333	0	9	3	9	7	4	10	7	8	3	4
267	6343693	0	45.6522	35.5556	28	46	45	0	0	0	100	80	0	0	60	31.25	0	21	7	25	21	20	25	23	15	16	21
267	6343694	0	50	20	1	4	5	NA	0	0	100	50	0	0	100	0	0	NA	1	2	2	2	3	3	2	1	3
268	6357059	29.4118	94.7368	38.4615	17	19	13	7.69231	100	100	91.6667	33.3333	42.8571	75	71.4286	75	33.3333	13	4	7	12	6	7	8	7	4	9
268	6357060	36.3636	80	45.4545	11	20	22	0	100	85.7143	76.9231	37.5	50	76.9231	100	70	38.4615	7	4	7	13	8	14	13	9	10	13
269	6362493	100	37.5	78.5714	17	24	28	100	100	0	75	91.6667	68.75	0	40	15.3846	46.1538	10	7	12	12	12	16	14	10	13	13
269	6362494	90	48.3871	63.6364	20	31	33	100	80	0	88.2353	66.6667	58.3333	0	72.7273	44.4444	69.2308	10	10	14	17	21	12	6	11	9	13
270	6371237	100	35.2941	94.7368	19	17	19	100	100	0	85.7143	100	92.3077	0	85	41.6667	90	17	2	10	7	6	13	9	20	12	10
270	6371238	100	33.3333	90	5	9	10	100	100	0	100	80	100	0	0	60	100	3	2	6	3	5	5	7	1	5	2
271	6400123	0	92.8571	37.5	14	28	16	0	0	94.1176	90.9091	0	50	87.5	0	100	33.3333	8	6	17	11	4	12	8	5	5	3
271	6400124	0	100	11.1111	6	16	9	0	0	100	100	0	50	60	0	100	0	5	1	8	8	7	2	5	5	1	9
272	6440752	34.375	84.6154	60	32	26	20	78.5714	0	84.6154	84.6154	54.5455	66.6667	5.26316	84.2105	42.8571	50	14	18	13	13	11	9	19	19	7	14
272	6440753	0	100	50	1	4	6	0	NA	100	100	50	50	0	50	100	0	1	NA	3	1	4	2	2	2	1	1
273	6621544	28.5714	70.8333	60	14	24	20	25	33.3333	61.5385	81.8182	55.5556	63.6364	14.2857	33.3333	35.7143	53.8462	8	6	13	11	9	11	14	12	14	13
273	6622097	33.3333	94.1176	41.6667	6	17	12	100	0	100	90.9091	0	83.3333	0	100	66.6667	50	2	4	6	11	6	6	7	1	3	4
274	6626205	33.3333	89.4737	72.7273	12	19	22	0	80	100	81.8182	87.5	64.2857	71.4286	82.3529	100	100	7	5	8	11	8	14	14	17	2	9
274	6626206	42.5	91.8919	78.0488	40	37	41	0	89.4737	95.2381	87.5	68.4211	86.3636	73.6842	74.0741	75	80	21	19	21	16	19	22	19	27	12	20
275	6648138	0	100	92.3077	6	13	13	0	NA	100	100	100	83.3333	23.0769	16.6667	0	90	6	NA	7	6	7	6	13	6	2	10
275	6648139	39.4737	90.2439	88.5714	38	41	35	0	75	85	95.2381	88.8889	88.2353	25	27.2727	0	82.3529	18	20	20	21	18	17	20	11	8	17
276	6697528	0	100	66.6667	3	5	3	0	NA	100	100	100	50	0	33.3333	NA	NA	3	NA	1	4	1	2	1	3	NA	NA
276	6697529	22.7273	76.4706	36.8421	22	17	19	0	71.4286	60	100	57.1429	25	0	50	45.4545	0	15	7	10	7	7	12	6	4	11	8
277	6728602	95.4545	20	41.1765	22	15	17	90.9091	100	0	75	42.8571	40	50	16.6667	100	0	11	11	11	4	7	10	6	6	4	1
277	6728603	83.3333	30	44.4444	12	10	27	100	66.6667	0	100	46.1538	42.8571	72.7273	0	100	0	6	6	7	3	13	14	11	4	3	5
278	6750173	86.3636	25	75.8621	22	16	29	86.6667	85.7143	0	80	93.3333	57.1429	44.4444	81.25	28.5714	72.7273	15	7	11	5	15	14	9	16	14	11
278	6750174	100	0	83.3333	25	13	30	100	100	0	NA	83.3333	83.3333	40	70.5882	63.6364	78.5714	21	4	13	NA	18	12	25	17	11	14
279	6756768	100	58.3333	70.5882	17	24	17	100	100	82.3529	0	75	69.2308	0	25	25	43.75	9	8	17	7	4	13	10	12	4	16
279	6756769	83.3333	14.2857	54.5455	6	7	11	100	50	50	0	71.4286	25	16.6667	50	25	37.5	4	2	2	5	7	4	6	4	4	8
280	6784878	0	82.9268	8.57143	38	41	35	0	0	80.9524	85	0	17.6471	33.3333	0	0	23.0769	23	15	21	20	18	17	15	18	10	13
280	6784879	0	100	50	3	4	4	0	0	100	100	0	100	0	0	0	33.3333	2	1	1	3	2	2	2	5	1	3
281	6824823	0	50	24.3243	39	36	37	0	0	89.4737	5.88235	0	50	75	0	47.0588	90.9091	28	11	19	17	19	18	16	23	17	22
281	6824824	0	68.75	42.8571	9	16	14	0	0	100	0	0	100	88.8889	0	50	75	6	3	11	5	8	6	9	6	6	8
282	6903127	23.5294	85.7143	53.8462	17	14	13	0	80	100	80	0	87.5	0	37.5	100	81.25	12	5	4	10	5	8	6	8	7	16
282	6903128	38.4615	90.625	57.6923	26	32	26	0	90.9091	93.75	87.5	0	93.75	0	85.7143	90.9091	86.3636	15	11	16	16	10	16	12	14	11	22
283	6910435	100	46.1538	85.7143	13	13	21	100	100	0	100	100	72.7273	87.5	100	75	85.7143	10	3	7	6	10	11	8	7	4	7
283	6910436	90.4762	47.3684	72.7273	21	19	22	91.6667	88.8889	0	100	92.3077	44.4444	75	100	75	100	12	9	10	9	13	9	4	9	4	5
284	6918976	27.2727	80.9524	53.8462	22	21	26	0	85.7143	85.7143	78.5714	35.7143	75	8.33333	35.2941	37.5	80	15	7	7	14	14	12	12	17	8	10
284	6918977	16.6667	87.5	66.6667	12	16	18	0	50	90	83.3333	50	80	16.6667	22.2222	33.3333	100	8	4	10	6	8	10	6	9	6	6
285	6926820	29.4118	91.3043	90.4762	17	23	21	0	100	84.6154	100	77.7778	100	44.4444	44.4444	100	77.7778	12	5	13	10	9	12	9	9	8	9
285	6926821	31.8182	95.4545	80	22	22	15	0	100	90	100	66.6667	88.8889	33.3333	57.1429	100	100	15	7	10	12	6	9	9	14	3	5
286	6927781	16.6667	100	73.913	18	23	23	0	75	100	100	61.5385	90	41.6667	60	88.8889	88.8889	14	4	11	12	13	10	12	10	9	9
286	6927782	53.3333	100	58.3333	15	13	12	0	100	100	100	50	75	37.5	33.3333	87.5	77.7778	7	8	9	4	8	4	8	9	8	9
287	6931126	33.3333	94.2857	50	15	35	20	9.09091	100	93.3333	95	23.0769	100	70	71.4286	100	100	11	4	15	20	13	7	10	7	10	12
287	6931127	28.125	97.4359	81.8182	32	39	44	0	90	96.1538	100	46.1538	96.7742	57.1429	76.1905	93.75	95	22	10	26	13	13	31	21	21	16	40
288	6941015	16.2162	84.7826	35	37	46	40	0	54.5455	83.3333	87.5	0	63.6364	0	35	14.2857	21.0526	26	11	30	16	18	22	14	20	7	19
288	6941016	27.2727	90.9091	30	22	22	30	0	66.6667	91.6667	90	0	56.25	0	0	36.3636	31.25	13	9	12	10	14	16	14	10	11	16
289	6959768	20	88.5714	70	25	35	30	0	100	92.3077	86.3636	54.5455	78.9474	72.2222	33.3333	86.6667	87.5	20	5	13	22	11	19	18	9	15	8
289	6959769	29.4118	96.2963	63.1579	34	27	38	0	76.9231	92.3077	100	42.1053	84.2105	69.2308	62.5	73.3333	78.9474	21	13	13	14	19	19	13	8	15	19
290	7004128	92.7273	42.8571	65.2174	55	56	46	95	86.6667	88.8889	0	50	85	45.4545	61.5385	72.2222	68.5714	40	15	27	29	26	20	22	26	18	35
290	7004129	88.8889	45.4545	50	9	11	14	88.8889	NA	71.4286	0	42.8571	57.1429	33.3333	72.7273	60	72.7273	9	NA	7	4	7	7	6	11	5	11
291	7011383	75.6098	0	34.2857	41	39	35	93.9394	0	0	0	0	70.5882	33.3333	25.9259	0	43.3333	33	8	14	25	18	17	18	27	12	30
291	7011384	50	0	25	8	22	8	66.6667	0	0	0	0	40	50	66.6667	0	100	6	2	9	13	3	5	8	6	4	3
292	7016091	16.6667	95	74.2857	24	20	35	0	80	100	90.9091	81.25	68.4211	38.4615	88.8889	69.2308	93.3333	19	5	9	11	16	19	13	9	13	15
292	7016092	20	87.5	78.125	20	32	32	0	80	88.8889	85.7143	100	65	54.5455	83.3333	78.5714	91.6667	15	5	18	14	12	20	11	18	14	12
293	7032231	75.7576	0	22.2222	33	23	18	100	0	0	0	0	30.7692	0	30.7692	0	0	25	8	10	13	5	13	12	13	7	7
293	7032232	72.2222	0	21.4286	18	15	28	92.8571	0	0	0	0	42.8571	0	50	0	0	14	4	12	3	14	14	6	6	4	4
294	7044787	65	3.84615	34.7826	20	26	23	92.8571	0	10	0	0	57.1429	41.6667	53.8462	57.1429	0	14	6	10	16	9	14	12	13	14	8
294	7044788	54.5455	0	33.3333	22	29	18	80	0	0	0	0	60	35.7143	23.0769	70	0	15	7	16	13	8	10	14	13	10	9
295	7112749	96.1538	50	63.8889	26	36	36	93.3333	100	0	100	94.1176	36.8421	31.8182	100	100	100	15	11	18	18	17	19	22	12	9	9
295	7112750	93.3333	48	54.5455	15	25	33	90.9091	100	0	92.3077	93.3333	22.2222	46.1538	100	100	100	11	4	12	13	15	18	13	11	9	11
296	7153692	57.1429	0	9.09091	14	17	11	0	88.8889	0	0	14.2857	0	80	57.1429	0	0	5	9	10	7	7	4	5	7	3	7
296	7153693	57.1429	0	22.7273	14	26	22	0	100	0	0	50	0	71.4286	25	0	25	6	8	19	7	10	12	7	4	6	4
297	7167268	93.75	38.7097	66.6667	32	31	33	91.6667	95	0	100	100	26.6667	63.6364	57.1429	83.3333	0	12	20	19	12	18	15	11	14	18	14
297	7167269	100	50	70	3	4	10	100	100	0	100	100	50	100	66.6667	100	0	2	1	2	2	4	6	4	3	4	3
298	7167885	0	47.8261	25	17	23	36	0	0	20	69.2308	23.5294	26.3158	7.14286	7.69231	16.6667	21.0526	13	4	10	13	17	19	14	13	6	19
298	7167886	0	50	40	7	10	5	0	NA	57.1429	33.3333	0	50	0	50	0	0	7	NA	7	3	1	4	2	4	3	2
299	7177220	100	4.7619	73.6842	7	21	19	100	100	0	9.09091	80	66.6667	75	70	66.6667	50	6	1	10	11	10	9	8	10	6	10
299	7177221	84.6154	0	53.8462	13	8	13	87.5	80	0	0	40	62.5	75	85.7143	40	85.7143	8	5	7	1	5	8	8	7	5	7
300	7197431	95.8333	6.25	72	24	16	25	94.7368	100	0	11.1111	100	46.1538	90.9091	100	0	55.5556	19	5	7	9	12	13	22	14	3	18
300	7197432	89.6552	0	77.2727	29	22	22	90	88.8889	0	0	81.8182	72.7273	61.5385	100	25	53.8462	20	9	10	12	11	11	13	13	4	13
301	7205296	0	96.4286	20	33	28	30	0	0	90.9091	100	0	31.5789	54.5455	0	0	7.14286	25	8	11	17	11	19	11	16	8	14
301	7205297	0	100	14.2857	6	6	7	0	NA	100	100	0	33.3333	16.6667	0	0	0	6	NA	3	3	4	3	6	2	4	8
302	7207910	93.75	0	65.3846	32	37	26	100	85.7143	0	0	84.6154	46.1538	55.5556	81.8182	54.5455	100	18	14	15	22	13	13	9	11	11	8
302	7207911	92.3077	0	46.1538	13	7	13	100	75	0	0	100	22.2222	75	100	75	83.3333	9	4	5	2	4	9	8	1	4	6
303	7250840	93.1034	44.8276	75	29	29	20	92.8571	93.3333	86.6667	0	60	90	76.9231	100	0	5.55556	14	15	15	14	10	10	13	14	19	18
303	7250841	100	55.5556	87.5	15	18	24	100	100	100	0	40	100	100	100	12.5	0	10	5	10	8	5	19	12	5	8	6
304	7271059	0	94.2857	73.1707	24	35	41	0	0	88.8889	96.1538	88.8889	60.8696	50	6.66667	76.9231	75	13	11	9	26	18	23	20	15	13	16
304	7271060	0	92.3077	79.1667	23	26	24	0	0	88.2353	100	100	54.5455	30.7692	0	83.3333	100	17	6	17	9	13	11	13	6	6	10
305	7533068	11.7647	88.4615	43.75	17	26	32	0	66.6667	91.6667	85.7143	41.6667	45	52.6316	87.5	75	33.3333	14	3	12	14	12	20	19	8	8	9
305	7533069	11.7647	80	50	17	25	26	0	33.3333	86.6667	70	18.1818	73.3333	57.1429	66.6667	33.3333	18.1818	11	6	15	10	11	15	7	9	6	11
306	7536830	0	93.75	90	11	16	10	0	NA	88.8889	100	100	83.3333	50	100	75	40	11	NA	9	7	4	6	4	5	4	10
306	7536831	22.2222	96.7742	84.8485	18	31	33	0	80	100	92.3077	82.3529	87.5	82.3529	100	90.9091	63.1579	13	5	18	13	17	16	17	13	11	19
307	7590200	100	50	83.3333	6	8	12	100	100	0	80	100	66.6667	100	100	100	50	5	1	3	5	6	6	4	2	2	6
307	7590201	96	34.6154	91.1765	25	26	34	100	92.8571	0	100	92.8571	90	77.7778	100	100	50	11	14	17	9	14	20	18	13	9	8
308	7590678	91.4286	37.1429	80.6452	35	35	31	87.5	100	92.8571	0	83.3333	78.9474	50	75	0	60	24	11	14	21	12	19	24	12	11	15
308	7590679	87.8788	40.625	80	33	32	30	91.3043	80	92.3077	5.26316	76.9231	82.3529	77.7778	66.6667	0	23.5294	23	10	13	19	13	17	18	12	6	17
309	7594957	0	51.6129	30.303	19	31	33	0	0	83.3333	7.69231	71.4286	0	0	0	0	42.8571	13	6	18	13	14	19	19	10	5	7
309	7594958	0	52.381	28.5714	14	21	21	0	0	91.6667	0	66.6667	0	0	0	0	45.4545	10	4	12	9	9	12	9	10	6	11
310	7597994	77.1429	0	65.9574	35	32	47	84	60	0	0	47.0588	76.6667	39.1304	28.5714	0	0	25	10	16	16	17	30	23	21	6	18
310	7597995	100	0	56	13	21	25	100	100	0	0	58.3333	53.8462	25	45.4545	0	0	11	2	10	11	12	13	16	11	6	7
311	7662660	73.913	0	60	23	15	15	100	0	0	0	81.8182	0	25	0	0	42.8571	17	6	12	3	11	4	4	7	2	7
311	7662661	87.5	0	50	8	6	6	100	0	0	0	100	0	25	0	66.6667	50	7	1	2	4	3	3	4	1	3	4
312	7664101	53.3333	0	17.8571	15	24	28	57.1429	0	0	0	38.4615	0	0	0	0	16.6667	14	1	8	16	13	15	7	18	7	6
312	7664102	46.6667	0	14.5833	45	64	48	63.6364	0	0	0	35	0	0	0	5.88235	19.2308	33	12	37	27	20	28	29	18	17	26
313	7664875	20	91.6667	33.3333	10	12	18	0	100	100	83.3333	0	100	33.3333	100	0	44.4444	8	2	6	6	12	6	9	7	1	9
313	7664876	52.381	93.1034	65.2174	21	29	23	0	91.6667	88.2353	100	0	93.75	41.6667	94.4444	36.3636	41.6667	9	12	17	12	7	16	12	18	11	12
314	7666390	33.3333	77.4194	47.8261	12	31	23	0	80	79.1667	71.4286	0	73.3333	9.09091	78.9474	60	63.6364	7	5	24	7	8	15	11	19	10	11
314	7666391	6.25	70	31.8182	16	30	22	0	50	70	70	0	63.6364	7.69231	57.1429	12.5	45.4545	14	2	20	10	11	11	13	14	8	11
315	7668999	69.2308	0	25.9259	13	16	27	100	0	0	0	46.6667	0	30	0	37.5	60	9	4	9	7	15	12	10	6	8	5
315	7669000	64.7059	0	21.4286	17	23	28	84.6154	0	0	0	45.4545	5.88235	29.4118	0	33.3333	16.6667	13	4	10	13	11	17	17	9	6	6
316	7712321	20	100	54.5455	5	1	11	0	100	NA	100	50	57.1429	0	0	50	NA	4	1	NA	1	4	7	2	1	4	NA
316	7712322	37.5	94.1176	73.3333	32	34	30	0	75	95	92.8571	83.3333	66.6667	68.1818	47.3684	92.3077	66.6667	16	16	20	14	12	18	22	19	13	12
317	7716901	100	41.9355	69.3878	28	31	49	100	100	86.6667	0	80	62.069	50	50	64.2857	71.4286	22	6	15	16	20	29	18	16	14	21
317	7716902	89.2857	40.625	55.5556	28	32	27	100	72.7273	86.6667	0	69.2308	42.8571	41.6667	30.7692	100	53.3333	17	11	15	17	13	14	12	13	7	15
318	7733808	0	91.4286	20.2899	63	70	69	0	0	91.4286	91.4286	0	36.8421	0	25	0	0	44	19	35	35	31	38	26	28	16	29
318	7733809	0	58.8235	34.7826	21	17	23	0	0	50	63.6364	0	66.6667	0	8.33333	0	0	17	4	6	11	11	12	9	12	6	9
319	7751342	100	0	75	7	6	4	100	100	0	0	50	100	100	100	50	75	6	1	3	3	2	2	1	2	2	4
319	7751343	85.7143	0	68	14	23	25	80	100	0	0	45.4545	85.7143	33.3333	88.8889	55.5556	100	10	4	11	12	11	14	9	9	9	9
320	7782008	85.7143	0	46.1538	21	19	26	93.75	60	0	0	40	54.5455	75	60	50	14.2857	16	5	12	7	15	11	12	10	8	7
320	7782009	80	0	52.5	25	34	40	93.75	55.5556	0	0	40	65	68.75	61.5385	33.3333	13.6364	16	9	17	17	20	20	16	13	12	22
321	7788969	21.0526	100	94.1176	19	15	17	0	80	100	100	100	88.8889	77.7778	100	100	100	14	5	9	6	8	9	9	9	6	5
321	7788970	15.7895	100	84.6154	19	23	26	0	100	100	100	90	81.25	75	100	100	100	16	3	14	9	10	16	4	10	3	6
322	7790349	83.3333	0	80	18	1	10	83.3333	NA	0	NA	80	NA	11.7647	50	80	NA	18	NA	1	NA	10	NA	17	12	5	NA
322	7790350	62.069	3.33333	14.7059	29	30	34	78.2609	0	4.54545	0	31.25	0	0	12.5	25	3.84615	23	6	22	8	16	18	18	24	8	26
323	7791649	37.8378	97.2222	96.6667	37	36	30	0	100	94.4444	100	100	93.75	92	100	90	90.9091	23	14	18	18	14	16	25	18	10	22
323	7791650	6.66667	94.7368	91.6667	15	19	24	0	100	90	100	84.6154	100	88.8889	100	100	100	14	1	10	9	13	11	9	12	15	12
324	7803017	14.2857	100	62.5	7	7	8	0	100	100	100	66.6667	60	33.3333	75	100	75	6	1	5	2	3	5	6	8	2	4
324	7803018	37.5	81.0811	65.8537	40	37	41	0	78.9474	73.6842	88.8889	76.1905	55	25	85.1852	84.2105	75	21	19	19	18	21	20	28	27	19	20
325	7955349	12.5	91.3043	69.5652	16	23	23	0	66.6667	83.3333	100	69.2308	70	16.6667	92.8571	75	55.5556	13	3	12	11	13	10	6	14	8	9
325	7955350	25	80	65.3846	16	20	26	0	66.6667	80	80	76.9231	53.8462	25	88.8889	75	38.4615	10	6	5	15	13	13	8	9	4	13
326	7967099	12.9032	96.9697	50	31	33	36	0	80	94.4444	100	0	100	52.381	23.0769	50	94.7368	26	5	18	15	18	18	21	13	10	19
326	7967100	13.0435	98.0769	55.5556	23	52	36	0	100	100	95.8333	0	100	33.3333	38.0952	40	100	20	3	28	24	16	20	21	21	10	25
327	7969260	0	83.3333	42.8571	10	18	14	0	0	100	75	0	60	25	25	0	66.6667	9	1	6	12	4	10	4	4	4	3
327	7969261	3.57143	90	26.9231	28	30	26	0	8.33333	92.8571	87.5	0	70	5.55556	15.3846	40	76.9231	16	12	14	16	16	10	18	13	5	13
328	7979137	0	92.3077	47.3684	40	39	38	0	0	89.4737	95	5.55556	85	17.2414	46.1538	33.3333	94.4444	25	15	19	20	18	20	29	13	12	18
328	7979138	0	100	40	11	19	15	0	0	100	100	12.5	71.4286	44.4444	100	42.8571	88.8889	9	2	11	8	8	7	9	5	7	9
329	7979745	0	100	37.5	11	17	16	0	0	100	100	0	85.7143	38.4615	55.5556	85.7143	87.5	8	3	8	9	9	7	13	9	7	8
329	7979746	0	93.75	34.6154	12	16	26	0	NA	85.7143	100	0	69.2308	37.5	62.5	14.2857	80	12	NA	7	9	13	13	16	16	7	10
330	8013577	81.25	39.3939	45.9459	16	33	37	85.7143	77.7778	72.2222	0	70.8333	0	20	55.5556	14.2857	14.2857	7	9	18	15	24	13	10	27	7	14
330	8013578	92.3077	37.5	47.0588	13	8	17	100	83.3333	75	0	100	0	33.3333	44.4444	0	25	7	6	4	4	8	9	3	9	4	4
331	8056392	83.3333	0	80	6	4	10	75	100	0	0	60	100	33.3333	100	NA	0	4	2	2	2	5	5	3	2	NA	4
331	8056393	85.7143	0	63.4921	56	29	63	81.8182	91.3043	0	0	51.5152	76.6667	41.6667	62.069	53.3333	0	33	23	11	18	33	30	24	29	15	10
332	8216302	100	56.25	61.5385	4	16	13	100	NA	90	0	100	28.5714	18.1818	30	50	0	4	NA	10	6	6	7	11	10	2	5
332	8216303	90.4762	47.9452	77.193	63	73	57	88.8889	94.4444	87.1795	2.94118	96.2963	60	55	47.619	35.7143	2.27273	45	18	39	34	27	30	20	21	14	44
333	8285340	86.9565	42.8571	69.5652	23	28	23	85.7143	88.8889	85.7143	0	41.6667	100	90	83.3333	40	100	14	9	14	14	12	11	10	12	10	12
333	8285341	95.4545	47.8261	64	22	23	25	100	75	90.9091	8.33333	25	100	63.6364	83.3333	50	93.3333	18	4	11	12	12	13	11	12	8	15
334	8406261	0	71.4286	50	2	7	2	0	NA	0	100	100	0	0	50	NA	0	2	NA	2	5	1	1	2	4	NA	2
334	8406262	0	42.4658	8.60215	89	73	93	0	0	0	83.7838	20	0	24.3243	22.2222	0	0	49	40	36	37	40	53	37	45	28	44
335	8491673	52.9412	100	61.1111	17	25	18	90	0	100	100	100	36.3636	44.4444	100	100	92.3077	10	7	12	13	7	11	9	12	3	13
335	8491674	60	100	61.9048	10	19	21	100	0	100	100	90	36.3636	66.6667	100	62.5	85.7143	6	4	6	13	10	11	9	9	8	14
336	8729123	88.8889	0	59.0909	18	16	22	92.8571	75	0	0	70	50	100	100	90	55.5556	14	4	10	6	10	12	4	8	10	9
336	8729124	92.3077	0	40	26	28	35	90.4762	100	0	0	21.4286	52.381	87.5	100	100	33.3333	21	5	16	12	14	21	8	8	6	12
337	8791913	14.2857	64.2857	45.4545	14	14	22	0	100	0	100	37.5	50	0	0	0	0	12	2	5	9	8	14	9	10	3	11
337	8792056	5.26316	53.5714	45.9459	19	28	37	0	50	0	100	50	42.1053	0	0	0	0	17	2	13	15	18	19	11	9	9	12
338	8823986	17.1429	81.8182	47.9167	35	33	48	13.7931	33.3333	85.7143	75	13.0435	80	86.6667	68.75	75	41.1765	29	6	21	12	23	25	15	16	16	17
338	8823987	9.09091	90	43.75	11	20	16	0	100	88.8889	90.9091	20	83.3333	94.4444	76.9231	87.5	50	10	1	9	11	10	6	18	13	8	6
339	8995414	92.8571	48.1481	80	14	27	35	90	100	16.6667	73.3333	68.75	89.4737	100	81.25	83.3333	35.7143	10	4	12	15	16	19	13	16	12	14
339	8995415	96.9697	41.0256	93.5484	33	39	31	96.2963	100	0	76.1905	88.2353	100	91.3043	75	76.9231	35	27	6	18	21	17	14	23	20	13	20
340	9121187	40	87.5	50	5	8	4	40	NA	100	0	100	33.3333	100	0	0	50	5	NA	7	1	1	3	1	3	1	2
340	9121188	39.2857	81.8182	75	28	33	36	40	38.4615	81.25	82.3529	68.75	80	75	30	40	46.6667	15	13	16	17	16	20	12	20	10	15
341	9138663	100	47.3684	90	25	19	20	100	100	100	0	91.6667	87.5	90.9091	100	88.8889	100	11	14	9	10	12	8	11	11	9	15
341	9138664	100	26.6667	91.6667	15	15	24	100	100	100	0	100	77.7778	100	88.8889	87.5	100	9	6	4	11	15	9	8	9	8	5
342	9196897	72.2222	31.0345	66.6667	18	29	27	68.75	100	0	64.2857	61.1111	77.7778	100	75	90.9091	86.6667	16	2	15	14	18	9	9	16	11	15
342	9196898	77.7778	21.4286	40	9	14	10	83.3333	66.6667	0	60	0	50	100	100	85.7143	80	6	3	9	5	2	8	2	4	7	5
343	9242933	86.6667	31.8182	50	15	22	10	90.9091	75	87.5	0	75	33.3333	42.8571	71.4286	0	77.7778	11	4	8	14	4	6	7	7	7	9
343	9242934	96	51.6129	88.3721	25	31	43	94.1176	100	80	0	95.8333	78.9474	75	81.8182	0	94.4444	17	8	20	11	24	19	4	22	5	18
344	9263737	78.5714	0	20	28	37	40	95.6522	0	0	0	0	36.3636	5.55556	0	0	0	23	5	14	23	18	22	18	15	13	22
344	9263738	78.3784	0	28.3333	37	41	60	93.5484	0	0	0	3.84615	47.0588	4.7619	0	0	0	31	6	20	21	26	34	21	27	16	17
345	9289238	18.1818	96.4286	57.1429	11	28	28	0	100	91.6667	100	88.8889	42.1053	25	62.5	33.3333	12.5	9	2	12	16	9	19	16	16	9	16
345	9289239	31.8182	87.7551	62.5	22	49	40	0	100	88.8889	86.3636	68.4211	57.1429	21.4286	52.1739	38.8889	30	15	7	27	22	19	21	28	23	18	30
346	9397932	95.4774	54.1096	68.3196	199	292	363	95.858	93.3333	6.50407	88.7574	93.1217	41.3793	40.6015	5	53.3333	5.45455	169	30	123	169	189	174	133	160	90	165
346	9397933	93.5484	51.5464	67.1533	93	97	137	92.2078	100	2.38095	89.0909	87.6712	43.75	40	1.42857	50	0	77	16	42	55	73	64	50	70	32	56
347	9399540	100	43.5897	66.6667	30	39	39	100	100	0	94.4444	88.8889	47.619	40	50	50	0	21	9	21	18	18	21	20	18	4	16
347	9399541	100	46.6667	68.4211	8	30	19	100	NA	0	100	90.9091	37.5	50	38.4615	42.8571	0	8	NA	16	14	11	8	10	13	7	12
348	9399795	92.5373	44.3038	73.5294	67	79	68	92.1569	93.75	0	92.1053	95.122	40.7407	50	0	66.6667	0	51	16	41	38	41	27	26	30	27	33
348	9399796	100	25	68.1818	11	12	22	100	100	0	100	88.8889	53.8462	40	0	66.6667	0	7	4	9	3	9	13	10	1	6	3
349	9407380	81.25	0	76.4706	16	21	17	83.3333	75	0	0	100	20	0	0	0	0	12	4	14	7	12	5	12	7	3	8
349	9407381	81.4815	0	61.6667	27	66	60	84.2105	75	0	0	83.3333	47.2222	0	4	0	0	19	8	32	34	24	36	27	25	21	27
350	9408370	91.6667	0	65.5172	24	24	29	94.1176	85.7143	0	0	91.6667	47.0588	0	0	0	0	17	7	14	10	12	17	8	13	6	15
350	9408371	91.1111	0	55.814	45	50	43	91.1765	90.9091	0	0	80	34.7826	0	0	0	0	34	11	21	29	20	23	16	25	19	27
351	9497245	0	91.4286	55	26	35	40	0	0	93.75	89.4737	31.5789	76.1905	0	15.7895	100	35	19	7	16	19	19	21	14	19	16	20
351	9497246	0	82.6087	63.6364	8	23	11	0	0	83.3333	81.8182	25	85.7143	0	22.2222	100	25	4	4	12	11	4	7	8	9	2	4
352	9532192	0	100	56.5217	13	17	23	0	0	100	100	0	92.8571	100	71.4286	28.5714	50	10	3	7	10	9	14	1	7	7	8
352	9532193	3.0303	86.7925	51.2195	33	53	41	3.7037	0	85.1852	88.4615	0	84	42.8571	41.6667	38.4615	45	27	6	27	26	16	25	21	24	13	20
353	9532306	0	84.6154	36.3636	16	26	22	0	0	86.6667	81.8182	0	53.3333	75	27.2727	40	30.7692	14	2	15	11	7	15	8	11	10	13
353	9532307	2.5641	92.3077	35.7143	39	52	42	2.85714	0	96.2963	88	0	71.4286	75	41.9355	46.6667	52.1739	35	4	27	25	21	21	28	31	15	23
354	9538061	81.8182	34.7826	68.75	11	23	16	77.7778	100	0	66.6667	80	63.6364	0	85.7143	50	75	9	2	11	12	5	11	11	7	4	8
354	9538062	77.2727	34.6154	70.5882	22	26	34	76.4706	80	0	75	75	64.2857	8.33333	50	72.7273	90.9091	17	5	14	12	20	14	12	6	11	11
355	9562367	0	100	31.5789	8	16	19	0	0	100	100	0	100	63.6364	0	100	0	3	5	9	7	13	6	11	5	2	5
355	9562368	0	92.5926	45.1613	16	27	31	0	0	94.4444	88.8889	0	82.3529	60	0	91.6667	0	11	5	18	9	14	17	5	17	12	12
356	9610548	8.33333	88.8889	79.5455	24	45	44	0	40	95.4545	82.6087	81.8182	77.2727	43.75	88.4615	93.3333	58.3333	19	5	22	23	22	22	32	26	15	24
356	9610549	21.4286	88.3721	67.6471	28	43	34	0	75	82.6087	95	66.6667	70	25	96.4286	84.6154	73.3333	20	8	23	20	24	10	24	28	13	30
357	9685414	100	44	92.8571	16	25	28	100	100	0	91.6667	94.7368	88.8889	77.7778	60	100	40	12	4	13	12	19	9	9	10	7	15
357	9685415	91.4286	37.2093	84.6154	35	43	52	90	100	0	88.8889	79.1667	89.2857	72	92	87.5	68.75	30	5	25	18	24	28	25	25	16	16
358	9688820	16.2162	87.1795	46.3415	37	39	41	0	85.7143	85	89.4737	86.3636	0	78.5714	63.6364	92.3077	81.8182	30	7	20	19	22	19	14	22	13	22
358	9688821	21.4286	91.6667	66.6667	14	12	18	0	100	85.7143	100	100	0	77.7778	16.6667	75	90.9091	11	3	7	5	12	6	18	6	4	11
359	9734491	41.6667	100	62.5	12	13	8	0	83.3333	100	100	83.3333	0	66.6667	55.5556	60	33.3333	6	6	6	7	6	2	3	9	5	3
359	9734492	41.6667	100	46.6667	12	13	15	0	100	100	100	87.5	0	14.2857	28.5714	40	100	7	5	7	6	8	7	7	7	5	2
360	9753535	37.1429	95.122	77.4194	35	41	31	0	100	88.8889	100	100	61.1111	68	78.2609	100	100	22	13	18	23	13	18	25	23	10	17
360	9753536	41.6667	100	61.5385	12	12	13	0	100	100	100	87.5	20	85.7143	100	0	100	7	5	5	7	8	5	7	7	1	5
361	9760526	100	57.1429	93.75	6	14	16	100	100	0	100	87.5	100	50	58.3333	71.4286	85.7143	4	2	6	8	8	8	4	12	7	7
361	9760527	93.3333	45.4545	92.3077	30	22	26	95.4545	87.5	7.69231	100	88.2353	100	90	69.2308	44.4444	80	22	8	13	9	17	9	10	13	9	15
362	9772333	5	72.7273	40	20	11	20	0	7.14286	100	0	16.6667	50	75	100	100	55.5556	6	14	8	3	6	14	4	12	9	9
362	9772334	0	45	41.1765	12	20	17	0	0	100	0	44.4444	37.5	100	100	100	40	11	1	9	11	9	8	4	2	4	5
363	9864418	72.2222	0	41.1765	18	15	17	66.6667	100	0	0	50	28.5714	100	14.2857	72.7273	57.1429	15	3	9	6	10	7	9	14	11	7
363	9864419	83.3333	0	45.4545	6	8	11	100	75	0	0	28.5714	75	40	66.6667	100	100	2	4	5	3	7	4	5	3	3	3
364	9865959	84.6154	0	70.5882	13	22	17	85.7143	83.3333	0	0	75	66.6667	90.9091	42.8571	75	100	7	6	9	13	8	9	11	14	4	10
364	9865960	100	0	45.4545	7	10	11	100	100	0	0	50	40	100	66.6667	50	57.1429	3	4	5	5	6	5	4	3	2	7
365	9871467	0	97.7273	25	46	44	32	0	0	100	95.8333	50	0	89.2857	100	85.7143	92	30	16	20	24	16	16	28	23	14	25
365	9871468	0	96.5517	27.5862	22	29	29	0	0	100	94.1176	53.3333	0	100	88.8889	100	100	15	7	12	17	15	14	12	9	7	8
366	9948471	20	80	60	5	10	10	0	100	100	66.6667	100	33.3333	0	42.8571	42.8571	63.6364	4	1	4	6	4	6	4	7	7	11
366	9948472	10	77.2727	54.5455	20	22	22	0	100	88.8889	69.2308	50	58.3333	0	54.5455	66.6667	50	18	2	9	13	10	12	16	11	9	8
367	9967786	13.0435	85.7143	82.9268	23	28	41	0	75	80	88.8889	73.913	94.4444	85.7143	94.7368	90.9091	94.4444	19	4	10	18	23	18	21	19	11	18
367	9967787	37.5	96.5517	95.082	40	29	61	3.84615	100	100	93.3333	100	88.8889	81.8182	85.1852	91.6667	84	26	14	14	15	34	27	22	27	24	25
368	9970226	14.2857	93.3333	82.3529	14	15	17	0	100	87.5	100	100	72.7273	87.5	50	100	60	12	2	8	7	6	11	8	4	2	5
368	9970227	21.2766	94.5946	76.9231	47	37	39	0	76.9231	100	89.4737	78.2609	75	65.3846	58.8235	86.6667	82.3529	34	13	18	19	23	16	26	17	15	17
369	10096340	83.3333	38.7097	78.1818	48	62	55	80	88.8889	88.8889	0	75	82.6087	82.1429	100	83.3333	64.7059	30	18	27	35	32	23	28	23	18	17
369	10096341	100	30.7692	66.6667	1	13	6	NA	100	100	10	100	50	85.7143	50	100	80	NA	1	3	10	2	4	7	2	1	5
370	10105626	92.8571	27.5862	69.697	14	29	33	92.3077	100	88.8889	0	50	88.2353	43.4783	92.3077	100	100	13	1	9	20	16	17	23	13	8	12
370	10105627	94.4444	46.8085	71.4286	36	47	42	92	100	100	3.84615	52.1739	94.7368	66.6667	85.7143	100	96.2963	25	11	21	26	23	19	27	21	12	27
371	10126473	31.8182	86.9565	53.8462	22	23	13	0	100	81.8182	91.6667	100	40	37.5	85.7143	50	86.6667	15	7	11	12	3	10	8	7	8	15
371	10126474	33.3333	100	60	24	25	30	11.7647	85.7143	100	100	70	40	61.5385	81.8182	22.2222	79.1667	17	7	8	17	20	10	13	22	9	24
372	10134636	10	56.25	40	10	16	10	12.5	0	0	100	16.6667	75	42.8571	0	0	50	8	2	7	9	6	4	7	5	5	6
372	10134637	0	44.4444	38.0952	18	36	21	0	0	0	88.8889	40	36.3636	33.3333	0	0	30.7692	14	4	18	18	10	11	9	16	12	13
373	10135052	0	45.4545	30	9	11	10	0	0	0	100	25	33.3333	60	0	0	40	6	3	6	5	4	6	5	4	5	5
373	10135053	0	60	44.4444	27	30	27	0	0	0	85.7143	28.5714	61.5385	50	0	0	40	12	15	9	21	14	13	18	11	9	10
374	10161429	40.9091	93.75	50	44	48	58	0	100	96.1538	90.9091	90.625	0	0	56	25	0	26	18	26	22	32	26	31	25	16	15
374	10161430	14.2857	100	62.5	7	9	8	0	100	100	100	100	0	16.6667	60	100	0	6	1	4	5	5	3	6	5	1	2
375	10183081	20	90.9091	28	20	11	25	0	100	100	83.3333	100	0	30.7692	85.7143	46.1538	90	16	4	5	6	7	18	13	7	13	10
375	10183082	27.7778	100	40	18	12	20	0	100	100	100	88.8889	0	11.1111	90.9091	66.6667	88.8889	13	5	4	8	9	11	9	11	3	9
376	10194887	100	38.4615	80	10	26	25	100	100	90.9091	0	84.6154	75	86.3636	81.8182	80	38.4615	8	2	11	15	13	12	22	11	5	13
376	10194888	84.4444	42.6471	79.5181	45	68	83	84.8485	83.3333	85.2941	0	80.9524	78.0488	82.0513	96.5517	84.2105	53.6585	33	12	34	34	42	41	39	29	19	41
377	10267119	95.6522	48.2759	81.25	23	29	32	95.2381	100	100	0	60	100	100	44.4444	80	94.1176	21	2	14	15	15	17	22	18	10	17
377	10267120	97.4359	50	77.4194	39	58	62	96.5517	100	96.6667	0	56.25	100	100	42.8571	95	90.9091	29	10	30	28	32	30	25	28	20	22
378	10284156	0	40	16.0714	34	50	56	0	0	0	95.2381	40.9091	0	0	45	0	0	26	8	29	21	22	34	26	20	18	39
378	10284157	2.85714	52.381	17.3913	35	42	46	3.22581	0	0	100	40	0	0	33.3333	0	0	31	4	20	22	20	26	14	9	4	18
379	10324873	40	93.75	73.3333	5	16	15	0	100	100	85.7143	75	71.4286	0	71.4286	66.6667	55.5556	3	2	9	7	8	7	7	7	3	9
379	10324874	39.3939	87.5	72.5	33	32	40	0	81.25	70	95.4545	100	56	52.9412	76.4706	63.6364	72.7273	17	16	10	22	15	25	17	17	11	11
380	10344601	31.5789	96.5517	68.75	19	29	32	7.14286	100	100	92.3077	42.8571	88.8889	88.2353	63.6364	60	88.8889	14	5	16	13	14	18	17	22	5	18
380	10344602	21.0526	96.7742	66.6667	38	31	51	0	88.8889	100	93.75	41.6667	88.8889	85	50	18.75	95.8333	29	9	15	16	24	27	20	22	16	24
381	10355199	51.8519	94.1176	75	27	34	36	40.9091	100	93.75	94.4444	100	52.6316	4.7619	73.6842	14.2857	17.6471	22	5	16	18	17	19	21	19	14	17
381	10355200	46.6667	93.75	84.2105	15	16	19	42.8571	100	88.8889	100	88.8889	80	0	66.6667	25	25	14	1	9	7	9	10	4	6	8	12
382	10459646	0	66.6667	21.2121	14	24	33	0	0	100	0	38.8889	0	0	30	0	0	10	4	16	8	18	15	11	10	3	6
382	10459647	0	40	19.0476	31	20	21	0	0	100	0	30.7692	0	0	33.3333	0	0	19	12	8	12	13	8	14	9	6	13
383	10483210	0	44.4444	14.2857	12	9	14	0	0	66.6667	0	40	0	0	0	0	0	5	7	6	3	5	9	5	6	1	4
383	10483211	0	66.6667	11.5385	13	21	26	0	0	100	0	30	0	0	0	0	0	11	2	14	7	10	16	13	10	6	11
384	10503089	0	56.6667	51.7241	27	30	29	0	0	94.4444	0	100	0	12.5	41.6667	0	0	12	15	18	12	15	14	8	12	9	6
384	10503090	0	100	66.6667	1	1	3	NA	0	100	NA	66.6667	NA	0	0	0	NA	NA	1	1	NA	3	NA	1	3	1	NA
385	10516694	0	62.5	25	12	16	8	0	0	100	0	50	0	0	57.1429	0	0	8	4	10	6	4	4	4	7	1	4
385	10516695	0	69.2308	50	18	13	16	0	0	100	0	61.5385	0	0	57.1429	0	0	7	11	9	4	13	3	6	7	6	3
386	10529701	0	51.6129	15	11	31	20	0	0	84.2105	0	50	0	0	57.1429	0	0	7	4	19	12	6	14	13	14	6	18
386	10529702	5.88235	72.7273	36.8421	17	11	19	9.09091	0	100	25	70	0	0	60	0	0	11	6	7	4	10	9	10	10	8	11
387	10625996	0	64.7059	30	10	17	10	0	0	100	0	50	0	0	43.75	100	50	7	3	11	6	6	4	7	16	11	10
387	10625997	0	46.1538	23.0769	13	13	13	0	0	100	12.5	50	0	0	0	100	50	9	4	5	8	6	7	7	5	2	2
388	10652964	93.75	30	90	16	10	20	92.3077	100	0	100	91.6667	87.5	0	50	25	50	13	3	7	3	12	8	8	2	4	10
388	10652965	90	45.4545	81.25	20	22	32	88.8889	100	0	100	77.7778	82.6087	0	18.1818	12.5	23.0769	18	2	12	10	9	23	11	11	8	13
389	10710426	100	28.5714	53.8462	3	7	13	100	NA	0	33.3333	60	50	100	0	100	33.3333	3	NA	1	6	5	8	5	2	1	3
389	10710458	95.4545	52	84.8485	22	25	33	93.75	100	61.5385	41.6667	72.7273	90.9091	45.4545	33.3333	35	58.8235	16	6	13	12	11	22	11	18	20	17
390	10761541	100	0	66.6667	3	2	3	100	NA	NA	0	100	0	100	100	100	0	3	NA	NA	2	2	1	1	3	2	1
390	10761542	100	0	65.2174	62	30	23	100	100	0	0	100	38.4615	100	93.75	100	0	25	37	12	18	10	13	14	16	12	19
391	10762738	83.3333	0	66.6667	18	29	48	75	100	0	0	83.3333	50	80	81.8182	100	5.26316	12	6	15	14	24	24	20	11	8	19
391	10762739	92.3077	12.5	87.5	13	8	8	88.8889	100	33.3333	0	100	66.6667	100	80	100	0	9	4	3	5	5	3	6	5	2	7
392	10772249	91.6667	0	85	12	21	20	88.8889	100	0	0	91.6667	75	100	100	100	50	9	3	8	13	12	8	5	10	3	10
392	10772250	87.5	0	83.3333	8	2	6	100	50	NA	0	75	100	100	100	100	33.3333	6	2	NA	2	4	2	5	1	2	3
393	10778993	100	0	90	3	6	10	100	100	0	0	100	87.5	100	100	100	NA	2	1	5	1	2	8	5	7	2	NA
393	10778994	95.122	0	91.2281	41	50	57	96.2963	92.8571	0	0	86.6667	96.2963	92.3077	96.2963	100	33.3333	27	14	23	27	30	27	26	27	16	21
394	10817811	95.5224	47.8261	76.7442	67	46	43	96.4286	94.8718	100	0	96	50	100	65.5172	90	0	28	39	22	24	25	18	14	29	10	28
394	10817812	100	0	83.3333	8	2	6	100	100	NA	0	100	50	100	100	100	0	6	2	NA	2	4	2	1	2	3	1
395	10822330	12.5	87.234	39.3939	40	47	33	0	45.4545	87.5	86.9565	0	86.6667	22.7273	54.1667	50	91.6667	29	11	24	23	18	15	22	24	16	24
395	10822331	22.2222	100	58.3333	9	18	12	0	66.6667	100	100	0	100	0	50	66.6667	77.7778	6	3	13	5	5	7	7	6	3	9
396	10831654	20	83.3333	80	5	6	5	25	0	100	66.6667	100	66.6667	75	100	100	NA	4	1	3	3	2	3	4	1	4	NA
396	10831655	46.6667	93.617	73.1707	30	47	41	50	40	95.8333	91.3043	73.913	72.2222	86.9565	56.25	93.75	42.1053	20	10	24	23	23	18	23	16	16	19
397	10855738	100	42.8571	78.9474	10	7	19	100	100	100	0	90	66.6667	25	42.8571	100	88.8889	9	1	3	4	10	9	4	7	8	9
397	10855739	100	35.2941	87.5	11	17	8	100	100	85.7143	0	100	83.3333	40	54.5455	100	83.3333	10	1	7	10	2	6	5	11	6	6
398	10858802	97.6378	43.6019	70.1571	127	211	191	99.0654	90	96.8085	0.854701	95.2381	50.4673	49.0741	47.0588	96.4286	46.9231	107	20	94	117	84	107	108	119	56	130
398	10858803	98.7952	51.7544	75.8621	83	114	116	100	92.8571	93.5484	1.92308	98.2143	55	50.7937	48.2143	90.625	62.963	69	14	62	52	56	60	63	56	32	81
399	10996681	33.3333	100	66.6667	3	3	6	0	100	100	100	0	100	100	100	NA	0	2	1	1	2	2	4	2	2	NA	2
399	10996682	55	100	72	20	31	25	27.2727	88.8889	100	100	41.6667	100	62.5	100	100	0	11	9	12	19	12	13	8	6	9	15
400	11004150	0	97.2222	25.7143	31	36	35	0	0	100	91.6667	0	56.25	0	0	92.3077	95	25	6	24	12	19	16	16	18	13	20
400	11004151	0	97.1429	23.0769	16	35	26	0	0	93.75	100	0	40	0	0	100	100	12	4	16	19	11	15	9	9	14	16
401	11030834	48	0	21.9512	25	29	41	33.3333	61.5385	0	0	4.7619	40	15	66.6667	50	62.5	12	13	15	14	21	20	20	18	8	16
401	11030835	40	0	36.8421	20	15	19	38.4615	42.8571	0	0	0	77.7778	0	33.3333	33.3333	22.2222	13	7	5	10	10	9	14	6	3	9
402	11042597	60	0	54.1667	15	32	24	61.5385	50	0	0	23.0769	90.9091	33.3333	100	66.6667	93.3333	13	2	17	15	13	11	9	20	6	15
402	11042598	75.8621	0	75	29	26	20	64.7059	91.6667	0	0	50	100	58.8235	94.4444	88.8889	100	17	12	12	14	10	10	17	18	9	19
403	11069427	100	0	64.5833	42	54	48	100	100	0	0	32	100	40	100	100	93.75	28	14	28	26	25	23	25	22	12	16
403	11069428	95.6522	0	80	23	8	20	100	92.3077	0	0	42.8571	100	100	83.3333	90	100	10	13	5	3	7	13	6	6	10	9
404	11121607	100	46.1538	62.1622	36	39	37	100	100	100	0	41.6667	100	33.3333	92.3077	100	92.8571	28	8	18	21	24	13	12	13	14	28
404	11121608	100	39.3939	65.2174	20	33	23	100	100	92.8571	0	46.6667	100	43.75	100	100	88.8889	15	5	14	19	15	8	16	16	14	9
405	11145405	80	40	55.5556	15	15	27	76.9231	100	28.5714	50	50	58.8235	100	100	90.9091	72.2222	13	2	7	8	10	17	9	8	11	18
405	11145406	72.7273	25	70	11	16	20	70	100	40	0	62.5	75	100	80	85.7143	69.2308	10	1	10	6	8	12	10	5	7	13
406	11174013	91.6667	43.75	58.8235	12	16	17	90	100	0	100	25	88.8889	14.2857	62.5	40	66.6667	10	2	9	7	8	9	7	16	5	9
406	11174014	94.1176	35.4839	70.7317	34	31	41	92.5926	100	0	78.5714	47.8261	100	21.7391	60	69.2308	50	27	7	17	14	23	18	23	20	13	22
407	11312164	100	16.6667	91.3043	18	18	23	100	100	100	0	92.8571	88.8889	55.5556	90	100	64.7059	13	5	3	15	14	9	9	10	6	17
407	11312165	100	45.1613	95.2381	18	31	21	100	100	93.3333	0	90	100	30.7692	88.8889	87.5	75	14	4	15	16	10	11	13	9	8	12
408	11371986	94.1176	38.8889	76.6667	34	36	30	91.3043	100	0	87.5	94.4444	50	0	86.6667	0	54.5455	23	11	20	16	18	12	11	15	11	11
408	11371987	91.6667	46.6667	82.3529	12	15	17	87.5	100	0	100	88.8889	75	0	100	0	60	8	4	8	7	9	8	3	10	6	5
409	11419378	51.6129	98.7342	80.4598	62	79	87	52.9412	45.4545	97.5	100	100	61.3636	85.1064	82.9268	94.1176	86.6667	51	11	40	39	43	44	47	41	17	45
409	11419379	40	100	50	5	2	2	25	100	100	100	NA	50	50	100	100	100	4	1	1	1	NA	2	2	1	2	2
410	11457527	0	50	23.0769	10	10	13	0	0	100	0	37.5	0	80	100	0	0	7	3	5	5	8	5	5	5	2	5
410	11457528	0	47.619	29.4118	10	21	17	0	0	100	0	71.4286	0	20	100	0	0	7	3	10	11	7	10	15	14	18	9
411	11519206	88.2353	32	76.7442	34	50	43	92.5926	71.4286	0	88.8889	50	96	88	90.4762	40	35.7143	27	7	32	18	18	25	25	21	15	14
411	11519207	100	36.3636	71.4286	12	22	21	100	100	0	100	25	100	100	100	66.6667	17.6471	11	1	14	8	8	13	16	13	6	17
412	11524874	22.7273	94.2857	50	22	35	36	0	100	100	90.9091	52.9412	47.3684	70.5882	50	0	84.2105	17	5	13	22	17	19	17	18	13	19
412	11524875	19.0476	92.5926	29.1667	21	27	24	0	100	91.6667	93.3333	33.3333	25	60	38.4615	0	64.2857	17	4	12	15	12	12	10	13	10	14
413	11525685	100	50	92.8571	10	16	14	100	100	0	100	100	85.7143	88.8889	50	100	100	8	2	8	8	7	7	9	6	2	5
413	11525686	100	36.6667	85.7143	27	30	42	100	100	5	100	100	75	75	88	88.8889	88.8889	21	6	20	10	18	24	16	25	9	27
414	11659505	0	51.8519	25	26	27	36	0	0	100	0	56.25	0	46.6667	0	62.5	6.66667	18	8	14	13	16	20	15	17	8	15
414	11659506	0	42.8571	24	14	21	25	0	0	81.8182	0	60	0	0	0	41.6667	0	10	4	11	10	10	15	5	15	12	7
415	11754453	0	54.902	33.3333	24	51	45	0	0	93.3333	0	0	53.5714	40	55.5556	0	95.4545	17	7	30	21	17	28	15	18	10	22
415	11754454	0	44.4444	14.2857	14	18	14	0	0	72.7273	0	0	28.5714	25	36.3636	0	100	10	4	11	7	7	7	8	11	8	3
416	11770977	97.1429	45.1613	95.7447	35	31	47	96.875	100	0	100	94.4444	96.5517	76	80	81.25	94.7368	32	3	17	14	18	29	25	20	16	19
416	11770978	100	43.4783	88.8889	11	23	18	100	100	0	90.9091	90.9091	85.7143	90.9091	90.9091	83.3333	88.8889	8	3	12	11	11	7	11	11	6	9
417	11871262	91.3043	0	85.7143	23	25	28	80	100	0	0	100	71.4286	60	37.5	50	0	10	13	10	15	14	14	10	8	10	16
417	11871263	73.3333	0	64.2857	15	18	14	55.5556	100	0	0	100	37.5	25	50	44.4444	0	9	6	3	15	6	8	8	6	9	3
418	11895641	100	50	74.1935	17	44	31	100	100	100	4.34783	90.9091	33.3333	81.25	63.1579	90	58.8235	12	5	21	23	22	9	16	19	10	17
418	11895642	100	47.8261	76.3158	20	23	38	100	100	76.9231	10	100	55	83.3333	66.6667	80	40	12	8	13	10	18	20	18	21	10	15
419	11898020	94.7368	38.8889	63.1579	19	18	19	93.3333	100	100	0	100	30	75	100	83.3333	40	15	4	7	11	9	10	8	6	6	10
419	11898021	96.2963	43.75	78.9474	27	32	38	95.2381	100	87.5	0	94.7368	63.1579	52.381	88.2353	87.5	28.5714	21	6	16	16	19	19	21	17	8	14
420	12046899	87.5	0	31.25	16	32	32	100	0	0	0	0	50	0	46.6667	0	0	14	2	11	21	12	20	20	15	6	13
420	12046900	60	0	23.2558	35	28	43	91.3043	0	0	0	0	41.6667	0	26.3158	0	0	23	12	14	14	19	24	16	19	16	18
421	12061673	17.3913	80	72.7273	23	25	22	5	100	66.6667	87.5	58.3333	90	22.2222	33.3333	15.3846	57.8947	20	3	9	16	12	10	9	9	13	19
421	12061674	31.5789	81.25	79.1667	19	16	24	25	66.6667	90	66.6667	71.4286	90	33.3333	28.5714	30	50	16	3	10	6	14	10	9	7	10	10
422	12139819	93.0233	0	62	43	38	50	93.5484	91.6667	0	0	21.0526	87.0968	0	95.6522	52.1739	96.2963	31	12	17	21	19	31	8	23	23	27
422	12139820	86.6667	3.57143	71.4286	15	28	21	85.7143	100	6.25	0	50	100	0	90	20	80	14	1	16	12	12	9	14	10	10	15
423	12141877	100	0	71.4286	14	20	21	100	100	0	0	33.3333	100	0	81.8182	25	87.5	11	3	10	10	9	12	13	11	4	8
423	12141878	96.4286	3.125	85.1064	28	32	47	94.7368	100	5.26316	0	60	96.875	0	91.3043	52.9412	95.6522	19	9	19	13	15	32	19	23	17	23
424	12142733	97.2973	5.26316	64.5161	37	38	31	94.4444	100	5.55556	5	47.3684	91.6667	0	95	50	100	18	19	18	20	19	12	26	20	16	13
424	12142734	90.3226	0	76.3158	31	27	38	83.3333	100	0	0	66.6667	92.8571	0	100	57.1429	100	18	13	14	13	24	14	13	11	7	18
425	12143948	96.7742	0	74.6032	31	54	63	100	85.7143	0	0	50	89.7436	3.57143	85.7143	41.1765	89.1892	24	7	30	24	24	39	28	21	17	37
425	12143949	88.5714	2.32558	63.2653	35	43	49	88.8889	87.5	0	3.84615	36.3636	85.1852	0	94.7368	22.2222	73.6842	27	8	17	26	22	27	15	19	9	19
426	12239979	23.8095	90.2439	47.2222	21	41	36	29.4118	0	90.4762	90	37.5	55	43.75	40	25	68.75	17	4	21	20	16	20	16	20	12	16
426	12239980	31.8182	86.8421	37.5	22	38	40	38.8889	0	94.4444	80	42.1053	33.3333	46.1538	23.5294	0	53.3333	18	4	18	20	19	21	13	17	3	15
427	12296485	100	25	91.6667	6	12	12	100	100	100	10	100	90	100	100	100	66.6667	4	2	2	10	2	10	8	5	4	6
427	12296486	93.75	52.1739	90	16	23	20	100	80	100	0	100	83.3333	100	66.6667	90	87.5	11	5	12	11	8	12	11	6	10	16
428	12354918	95.2941	50.1818	58.5253	170	275	217	96.0784	88.2353	96.4789	0.75188	0	98.4496	0	20	18.8235	71.223	153	17	142	133	88	129	164	130	85	139
428	12354919	100	51.8519	72.5	17	27	40	100	100	100	0	0	100	0	7.40741	15.7895	73.3333	11	6	14	13	11	29	15	27	19	15
429	12361264	97.0588	50.9434	52.381	34	53	42	96.4286	100	93.1034	0	0	100	0	57.6923	56.25	79.1667	28	6	29	24	20	22	19	26	16	24
429	12361265	100	36.3636	58.3333	21	22	24	100	100	100	0	0	100	6.66667	43.75	66.6667	100	13	8	8	14	10	14	15	16	3	5
430	12423992	33.3333	82.1429	51.7241	21	28	29	33.3333	33.3333	58.3333	100	53.8462	50	100	84	80	54.5455	15	6	12	16	13	16	7	25	10	11
430	12423993	50	100	66.6667	10	9	9	50	50	100	100	75	60	100	83.3333	66.6667	80	8	2	5	4	4	5	4	6	3	5
431	12454874	100	41.1765	60	5	17	5	100	100	100	0	33.3333	100	0	66.6667	50	100	4	1	7	10	3	2	6	3	2	8
431	12454875	96.875	50	61.5385	32	40	39	96	100	95	5	30	94.7368	0	56.5217	53.3333	100	25	7	20	20	20	19	20	23	15	26
432	12469071	100	50	70	24	38	40	100	100	100	0	50	86.3636	52.9412	0	71.4286	93.75	18	6	19	19	18	22	17	16	7	16
432	12469072	93.3333	50	66.6667	15	24	27	90	100	92.3077	0	25	100	33.3333	0	0	85.7143	10	5	13	11	12	15	15	11	4	14
433	12621437	100	45.4545	90.9091	9	22	11	100	100	90.9091	0	85.7143	100	100	16.6667	0	88.8889	7	2	11	11	7	4	9	6	3	9
433	12621438	100	14.2857	88.8889	24	14	18	100	100	100	0	81.8182	100	100	55.5556	0	100	21	3	2	12	11	7	11	9	11	9
434	12640061	95.6522	35.7143	62.5	23	28	24	100	90	76.9231	0	18.1818	100	100	53.8462	0	100	13	10	13	15	11	13	5	13	9	14
434	12640062	100	50	68.1818	13	22	22	100	100	100	0	53.8462	88.8889	100	60	0	100	10	3	11	11	13	9	7	5	7	14
435	12641856	100	52.6316	60.7143	22	19	28	100	100	90.9091	0	50	68.75	86.6667	100	0	91.6667	19	3	11	8	12	16	15	22	6	12
435	12641857	100	48.0769	80.9524	37	52	42	100	100	96.1538	0	63.6364	100	96.1538	100	0	100	26	11	26	26	22	20	26	28	19	33
436	12648058	100	51.4286	95	32	35	40	100	100	5.88235	94.4444	93.75	95.8333	95.6522	100	80	95.4545	23	9	17	18	16	24	23	16	15	22
436	12648059	100	46.6667	91.6667	9	15	12	100	100	0	100	100	87.5	100	88.8889	100	80	4	5	8	7	4	8	2	9	6	5
437	12652800	97.2222	47.5	63.0435	36	40	46	96	100	95	0	34.7826	91.3043	91.3043	86.9565	6.66667	83.3333	25	11	20	20	23	23	23	23	15	30
437	12652801	95.2381	42.8571	61.1111	21	21	18	100	80	90	0	41.6667	100	80	84.6154	0	66.6667	16	5	10	11	12	6	10	13	8	9
438	12719052	60.7143	0	25.641	28	35	39	47.3684	88.8889	0	0	33.3333	16.6667	26.087	44.4444	0	36.6667	19	9	18	17	21	18	23	18	13	30
438	12719053	56.5217	0	24.3243	23	40	37	47.0588	83.3333	0	0	28.5714	18.75	27.2727	46.1538	0	13.3333	17	6	20	20	21	16	22	13	15	15
439	12724988	0	69.2308	30	10	13	20	0	0	100	0	25	37.5	44.4444	0	71.4286	28.5714	8	2	9	4	12	8	9	15	7	14
439	12724989	0	54.3478	50	33	46	48	0	0	96.1538	0	45.8333	54.1667	53.3333	0	38.4615	56.5217	21	12	26	20	24	24	15	20	13	23
440	12793162	72.2222	18.1818	50	18	22	20	71.4286	75	42.8571	6.66667	30	70	92.3077	70	50	64.2857	14	4	7	15	10	10	13	10	8	14
440	12793163	71.4286	18.5185	61.1111	14	27	18	57.1429	85.7143	30	11.7647	33.3333	75	90	87.5	50	37.5	7	7	10	17	6	12	10	8	4	8
441	12793276	80	10	62.5	10	10	8	71.4286	100	20	0	33.3333	80	100	100	100	80	7	3	5	5	3	5	7	4	3	5
441	12793277	75	23.4043	57.8947	40	47	38	62.5	93.75	27.2727	20	44.4444	70	81.8182	80	33.3333	46.1538	24	16	22	25	18	20	11	10	12	13
442	12793893	0	59.2593	34.2105	20	27	38	0	0	0	80	0	65	0	0	100	0	18	2	7	20	18	20	11	14	16	12
442	12793894	0	48	19.6078	42	50	51	0	0	0	96	0	41.6667	0	0	100	0	31	11	25	25	27	24	25	22	17	23
443	12853189	33.3333	95.2381	78.5714	15	21	14	23.0769	100	85.7143	100	100	62.5	42.8571	100	100	28.5714	13	2	7	14	6	8	7	5	5	14
443	12853190	52.9412	97.2222	62.963	34	36	27	40.7407	100	100	95	92.8571	30.7692	31.5789	100	83.3333	50	27	7	16	20	14	13	19	17	12	26
444	12961739	45.4545	100	78.5714	11	12	14	33.3333	100	100	100	83.3333	75	45.4545	100	66.6667	92.3077	9	2	8	4	6	8	11	7	3	13
444	12961740	47.2222	90.3226	89.7436	36	31	39	37.931	85.7143	91.6667	89.4737	90.4762	88.8889	57.1429	80	90	85.7143	29	7	12	19	21	18	21	30	10	21
445	13027695	47.9167	88.5714	61.2245	48	35	49	51.8519	42.8571	88.2353	88.8889	89.2857	23.8095	40	0	35.7143	81.25	27	21	17	18	28	21	20	22	14	16
445	13027696	55.5556	100	66.6667	9	8	9	42.8571	100	100	100	100	62.5	66.6667	0	NA	100	7	2	1	7	1	8	9	2	NA	9
446	13165999	84	0	78.1818	25	51	55	85.7143	75	0	0	79.3103	76.9231	22.2222	74.0741	92.3077	72	21	4	22	29	29	26	18	27	13	25
446	13166000	88	0	66.6667	25	26	42	85.7143	100	0	0	69.5652	63.1579	31.25	78.2609	77.7778	71.4286	21	4	13	13	23	19	16	23	9	14
447	13232313	63.6364	0	62.5	11	26	16	50	100	0	0	44.4444	85.7143	22.2222	75	33.3333	80	8	3	12	14	9	7	9	8	9	5
447	13232314	83.6735	0	66.6667	49	49	48	69.2308	100	0	0	44	91.3043	35.2941	80.7692	50	95.4545	26	23	30	19	25	23	17	26	16	22
448	13238624	0	93.4426	54.2857	57	61	70	0	0	93.75	93.1034	0	79.1667	50	0	39.1304	51.5152	32	25	32	29	22	48	28	33	23	33
448	13238625	0	100	43.75	14	7	16	0	0	100	100	0	100	0	0	66.6667	66.6667	10	4	4	3	9	7	3	3	3	3
449	13245529	0	100	33.3333	1	2	3	0	NA	100	100	NA	33.3333	0	0	100	33.3333	1	NA	1	1	NA	3	6	1	2	3
449	13245530	0	86.4407	12.963	73	59	54	0	0	87.1795	85	0	26.9231	16	0	38.0952	42.8571	37	36	39	20	28	26	25	39	21	21
450	13262981	23.5294	72.7273	48.4848	34	22	33	30.7692	0	75	71.4286	36.8421	64.2857	22.2222	23.5294	75	66.6667	26	8	8	14	19	14	18	17	8	12
450	13262982	16.6667	71.4286	33.3333	12	7	9	22.2222	0	100	50	0	75	75	0	100	33.3333	9	3	3	4	5	4	4	5	1	3
451	13275861	92.3077	0	39.0244	39	38	41	92	92.8571	0	0	88.8889	0	7.69231	56	0	18.1818	25	14	22	16	18	23	13	25	15	11
451	13275862	90	0	52.1739	20	21	23	87.5	100	0	0	85.7143	0	44.4444	58.3333	0	40	16	4	7	14	14	9	9	12	4	15
452	13279889	100	0	92	23	26	25	100	100	0	0	100	85.7143	0	71.4286	0	94.4444	14	9	12	14	11	14	10	7	12	18
452	13279890	100	0	82.0513	28	25	39	100	100	0	0	91.3043	68.75	12.5	65	16.6667	66.6667	18	10	8	17	23	16	8	20	6	18
453	13288042	100	0	65	12	9	20	100	100	0	0	80	50	0	33.3333	0	66.6667	5	7	5	4	10	10	11	3	1	3
453	13288043	100	0	70.3704	19	21	27	100	100	0	0	100	57.8947	0	43.75	0	50	11	8	16	5	8	19	10	16	4	12
454	13338545	41.6667	94.4444	61.7021	36	54	47	38.4615	50	96	93.1034	100	43.75	68.4211	31.8182	70	40	26	10	25	29	15	32	19	22	10	20
454	13338546	53.3333	95.2381	68.75	15	21	16	61.5385	0	90	100	85.7143	55.5556	75	62.5	100	33.3333	13	2	10	11	7	9	8	8	5	6
455	13530103	96.2963	0	56.25	27	25	16	92.3077	100	0	0	57.1429	55.5556	50	83.3333	20	91.6667	13	14	14	11	7	9	18	6	5	12
455	13530104	100	0	31.25	13	23	16	100	100	0	0	28.5714	33.3333	25	81.8182	50	100	10	3	11	12	7	9	8	11	4	11
456	13537564	66.6667	0	40	6	3	5	50	100	0	0	0	100	50	0	100	100	4	2	2	1	3	2	2	3	1	3
456	13537565	55.5556	0	22.2222	63	46	54	48.3871	62.5	0	0	0	42.8571	38.2353	42.8571	40	77.2727	31	32	23	23	26	28	34	21	10	22
457	13550540	33.3333	82.7586	70.8333	27	29	24	31.8182	40	75	92.3077	84.6154	54.5455	35.2941	44.4444	30.7692	0	22	5	16	13	13	11	17	18	13	19
457	13550541	36.3636	100	41.1765	11	18	17	40	0	100	100	71.4286	20	25	30	14.2857	0	10	1	9	9	7	10	4	20	7	3
458	13600175	25	65	53.3333	12	20	30	37.5	0	70	60	50	57.1429	60	45.4545	80	58.3333	8	4	10	10	16	14	15	11	10	12
458	13600341	42.8571	88.6364	46	56	44	50	42.1053	43.2432	83.3333	92.3077	45	46.6667	58.3333	0	84.6154	50	19	37	18	26	20	30	24	35	13	20
459	13643566	25.7143	78.9474	36.3636	35	19	22	56.25	0	88.8889	70	36.3636	36.3636	50	0	100	87.5	16	19	9	10	11	11	10	12	2	8
459	13643567	0	100	50	1	1	6	0	NA	100	NA	25	100	50	0	NA	0	1	NA	1	NA	4	2	2	2	NA	1
460	13650783	66.6667	0	16.6667	15	14	6	54.5455	100	0	0	100	0	0	36.3636	25	0	11	4	5	9	1	5	6	11	4	4
460	13650784	72.7273	0	17.6471	11	7	17	62.5	100	0	0	33.3333	0	0	50	0	0	8	3	4	3	9	8	5	6	4	5
461	13687912	100	0	62.5	6	12	16	100	100	0	0	100	33.3333	0	83.3333	100	100	5	1	6	6	7	9	6	6	4	11
461	13687913	95	0	69.5652	20	20	23	92.3077	100	0	0	93.75	14.2857	0	88.2353	85.7143	100	13	7	10	10	16	7	9	17	7	13
462	13736117	50	0	25	8	10	16	50	NA	0	0	0	40	16.6667	80	40	0	8	NA	4	6	6	10	6	5	5	2
462	13736118	59.0909	3.33333	34.2857	22	30	35	62.5	50	6.66667	0	0	63.1579	23.0769	72.2222	33.3333	76.9231	16	6	15	15	16	19	13	18	6	13
463	13736574	57.1429	0	22.2222	28	36	36	61.1111	50	0	0	0	44.4444	42.8571	92.8571	14.2857	35	18	10	15	21	18	18	14	14	7	20
463	13736575	65	0	22.2222	20	22	18	66.6667	60	0	0	0	44.4444	69.2308	76.9231	50	71.4286	15	5	9	13	9	9	13	13	10	7
464	13739645	65	0	23.0769	20	18	26	56.25	100	0	0	0	42.8571	40	37.5	12.5	17.6471	16	4	10	8	12	14	15	8	8	17
464	13739646	55.5556	0	27.7778	18	27	18	70	37.5	0	0	0	62.5	27.2727	54.5455	22.2222	33.3333	10	8	12	15	10	8	11	11	9	12
465	13835583	94.5946	43.2432	94.2857	37	37	35	92.8571	100	88.8889	0	86.6667	100	72.2222	85.7143	61.5385	91.3043	28	9	18	19	15	20	18	21	13	23
465	13835599	100	54.5455	69.2308	9	11	13	100	100	100	0	50	85.7143	91.6667	100	100	100	7	2	6	5	6	7	12	5	2	6
466	13851161	0	62.069	21.875	24	29	32	0	0	0	100	38.8889	0	30	0	0	0	17	7	11	18	18	14	10	17	5	16
466	13851162	0	63.6364	30	11	11	10	0	0	0	100	40	20	57.1429	0	28.5714	0	8	3	4	7	5	5	7	6	7	3
467	13876282	0	80	60	2	10	5	0	0	0	100	100	0	0	NA	NA	0	1	1	2	8	3	2	3	NA	NA	3
467	13876283	0	42.8571	16.2791	28	35	43	0	0	0	100	33.3333	0	0	0	55.5556	0	20	8	20	15	21	22	20	20	9	28
468	13930197	100	45.4545	91.6667	11	22	36	100	100	100	0	94.1176	89.4737	86.6667	100	92.3077	94.4444	10	1	10	12	17	19	15	11	13	18
468	13930198	100	50	91.6667	17	24	24	100	NA	85.7143	0	88.8889	93.3333	100	75	100	90	17	NA	14	10	9	15	14	8	13	10
469	13939069	0	58.3333	26.087	27	24	23	0	0	0	87.5	0	60	0	0	0	0	19	8	8	16	13	10	11	10	6	13
469	13939070	0	54.5455	41.1765	13	22	17	0	NA	0	100	0	63.6364	0	0	0	0	13	NA	10	12	6	11	10	6	2	7
470	13941352	0	58.8235	55.5556	22	17	18	0	0	0	100	0	76.9231	0	0	0	0	13	9	7	10	5	13	7	7	9	10
470	13941353	3.0303	45.4545	22.2222	33	44	36	4.7619	0	0	95.2381	0	42.1053	0	0	0	0	21	12	23	21	17	19	22	23	10	14
471	13952896	0	60	25	12	15	24	0	0	0	81.8182	0	46.1538	0	9.09091	0	0	10	2	4	11	11	13	11	11	6	8
471	13952897	4.16667	45.1613	21.7391	24	31	23	7.14286	0	0	100	0	45.4545	0	0	0	0	14	10	17	14	12	11	20	16	11	20
472	13973599	0	52.9412	32.1429	23	34	28	0	0	0	100	0	52.9412	0	0	0	0	15	8	16	18	11	17	15	15	15	17
472	13973600	0	42.8571	15.3846	10	14	13	0	0	0	85.7143	0	22.2222	0	0	0	0	7	3	7	7	4	9	3	7	2	8
473	14054079	22.2222	100	91.6667	9	12	12	28.5714	0	100	100	100	66.6667	100	66.6667	100	100	7	2	7	5	9	3	6	3	2	3
473	14054080	27.2727	96	73.0769	22	25	26	50	0	100	93.3333	100	41.6667	100	84.2105	90	53.3333	12	10	10	15	14	12	13	19	10	15
474	14088551	60	0	14.2857	10	12	14	50	100	0	0	0	25	0	0	0	0	8	2	5	7	6	8	3	4	4	4
474	14088552	56.25	0	8.33333	16	26	12	45.4545	80	0	0	0	16.6667	0	0	0	0	11	5	11	15	6	6	10	13	5	6
475	14098420	40	95.6522	50	20	23	22	57.1429	0	100	90.9091	85.7143	33.3333	91.6667	85.7143	100	100	14	6	12	11	7	15	12	14	2	12
475	14098421	42.1053	95.6522	50	19	23	20	53.3333	0	90.9091	100	75	33.3333	87.5	77.7778	81.8182	100	15	4	11	12	8	12	8	9	11	12
476	14112369	35.2941	100	76.9231	17	17	13	37.5	0	100	100	100	66.6667	100	100	100	84.6154	16	1	10	7	4	9	6	9	9	13
476	14112370	20.8333	89.2857	79.4118	24	28	34	50	0	93.75	83.3333	94.4444	62.5	91.6667	100	100	100	10	14	16	12	18	16	12	7	8	15
477	14134070	100	0	18.1818	3	8	11	100	100	0	0	0	40	60	0	0	0	1	2	4	4	6	5	5	7	3	3
477	14134071	68.75	0	22.2222	32	20	18	30.7692	94.7368	0	0	0	50	66.6667	0	0	0	13	19	12	8	10	8	9	7	4	7
478	14140337	92.3077	50	84.2105	13	22	19	91.6667	100	84.6154	0	100	66.6667	50	36.3636	100	85.7143	12	1	13	9	10	9	6	11	6	7
478	14140338	88	36.5385	86.4407	50	52	59	82.1429	95.4545	76	0	96.5517	76.6667	80.6452	68.9655	91.6667	80.7692	28	22	25	27	29	30	31	29	12	26
479	14437023	0	50	18.1818	18	20	22	0	0	90.9091	0	36.3636	0	0	0	0	0	17	1	11	9	11	11	9	10	5	7
479	14437024	10	69.4444	30.303	30	36	33	4.54545	25	96.1538	0	66.6667	0	0	0	0	5	22	8	26	10	15	18	11	27	9	20
480	14450674	62.8571	0	56	35	23	25	100	35	0	0	0	87.5	50	0	60	70	15	20	9	14	9	16	8	9	5	10
480	14450675	100	0	60	3	3	5	100	100	0	0	0	100	0	100	50	100	2	1	1	2	2	3	1	1	2	3
481	14479318	100	0	50	2	4	4	100	NA	0	0	0	100	80	NA	0	40	2	NA	3	1	2	2	5	NA	1	5
481	14479319	55.8824	0	35.2941	34	26	51	100	0	0	0	0	56.25	92.8571	40	53.3333	30	19	15	16	10	19	32	14	15	15	20
482	14761858	100	54.5455	85	11	11	20	100	100	100	0	75	91.6667	50	50	100	100	8	3	6	5	8	12	2	4	3	5
482	14761859	100	60	96.6667	13	30	30	100	100	100	0	93.75	100	80	25	83.3333	83.3333	11	2	18	12	16	14	5	12	6	12
483	14914351	71.1111	0	22.9508	45	58	61	96.9697	0	0	0	0	35.8974	0	0	0	80	33	12	44	14	22	39	37	31	24	20
483	14914352	60	0	9.09091	5	7	11	100	0	0	0	0	25	0	0	0	NA	3	2	6	1	7	4	2	3	2	NA
484	15074779	46.3768	93.4211	71.4286	69	76	98	34.8837	65.3846	94.4444	90.9091	44.898	97.9592	89.4737	25.5814	74.359	50	43	26	54	22	49	49	57	43	39	16
484	15074780	46.6667	93.9394	73.0769	15	33	26	22.2222	83.3333	90	100	58.8235	100	84.6154	37.5	83.3333	25	9	6	20	13	17	9	13	8	6	4
485	15129092	80.9524	0	18.75	21	25	32	89.4737	0	0	0	0	31.5789	0	0	0	60	19	2	13	12	13	19	9	11	15	15
485	15129093	67.5676	0	26.9231	37	46	52	89.2857	0	0	0	4.16667	46.4286	4	0	0	61.1111	28	9	24	22	24	28	25	21	17	18
486	15130333	78.9474	0	26.9231	19	18	26	93.75	0	0	0	0	46.6667	0	0	0	84.6154	16	3	12	6	11	15	8	5	8	13
486	15130334	100	50	88.8889	21	2	18	100	NA	100	0	0	94.1176	NA	NA	NA	83.3333	21	NA	1	1	1	17	NA	NA	NA	18
487	15198331	76.5432	0	42.623	81	46	61	86.1111	0	0	0	0	57.7778	0	5.26316	0	68.4211	72	9	22	24	16	45	22	19	13	57
487	15198332	55.5556	11.1111	37.5	9	9	8	71.4286	0	0	20	0	50	0	0	0	77.7778	7	2	4	5	2	6	4	1	1	9
488	15282766	61.6667	0	13.4328	60	70	67	80	36	0	0	0	31.0345	0	0	0	90.625	35	25	29	41	38	29	47	37	18	32
488	15282767	76.6667	2.77778	34.4828	30	36	29	86.3636	50	7.69231	0	0	62.5	0	0	0	62.5	22	8	13	23	13	16	18	16	10	24
489	15299487	95.4545	0	50	22	7	20	100	0	0	0	0	66.6667	25	0	0	82.3529	21	1	3	4	5	15	4	2	2	17
489	15299488	72.973	0	25	37	47	44	96.4286	0	0	0	0	57.8947	0	0	0	90.3226	28	9	30	17	25	19	26	31	11	31
490	15412563	38.8889	85	61.3636	36	40	44	77.7778	0	89.4737	80.9524	50	70.8333	10.5263	61.5385	63.6364	52.1739	18	18	19	21	20	24	19	26	11	23
490	15412564	0	100	25	2	1	4	NA	0	100	NA	0	100	0	100	NA	50	NA	2	1	NA	3	1	1	1	NA	2
491	15552159	92.8571	0	78.5714	14	16	28	90	100	0	0	88.8889	60	63.6364	91.6667	0	84.6154	10	4	8	8	18	10	11	12	8	13
491	15552160	92.3077	0	87.0968	26	26	31	100	75	0	0	93.3333	81.25	61.5385	78.5714	0	91.6667	18	8	12	14	15	16	13	14	9	12
492	15644866	56	13.7931	49.2537	50	58	67	37.931	80.9524	14.7059	12.5	53.8462	42.8571	3.57143	30	5.88235	9.09091	29	21	34	24	39	28	28	20	17	33
492	15644867	57.1429	0	50	7	2	4	50	100	0	0	100	33.3333	0	0	0	0	6	1	1	1	1	3	2	3	2	4
493	15888096	50	100	70	4	5	10	50	50	100	100	0	100	NA	0	NA	100	2	2	3	2	3	7	NA	7	NA	1
493	15888097	31.5789	97.4359	54.1667	19	39	24	33.3333	25	100	93.75	0	100	80	5.26316	23.0769	53.3333	15	4	23	16	11	13	10	19	13	15
494	15896109	57.1429	100	73.3333	14	17	15	57.1429	57.1429	100	100	57.1429	87.5	100	0	100	100	7	7	9	8	7	8	10	8	7	8
494	15896110	33.3333	84.6154	55.5556	9	13	18	42.8571	0	71.4286	100	27.2727	100	88.8889	0	50	100	7	2	7	6	11	7	9	12	2	12
495	16041827	100	50	60	1	2	5	100	NA	0	100	50	66.6667	NA	NA	NA	NA	1	NA	1	1	2	3	NA	NA	NA	NA
495	16041828	84.0909	35.7143	81.4815	44	42	54	80	89.4737	4.7619	66.6667	90	76.4706	95.8333	100	100	89.2857	25	19	21	21	20	34	24	26	18	28
496	16066039	34.4828	96	55.5556	29	25	27	45.4545	0	100	92.3077	62.5	52.6316	0	40	0	55.5556	22	7	12	13	8	19	15	10	6	9
496	16066040	29.2683	94.7368	52.9412	41	38	34	40	0	92	100	61.1111	43.75	0	40.7407	0	52.381	30	11	25	13	18	16	21	27	20	21
497	16098031	50	97.1429	55.1724	22	35	29	53.3333	42.8571	94.4444	100	37.5	76.9231	50	50	33.3333	60	15	7	18	17	16	13	12	12	6	15
497	16098032	20	100	50	5	10	4	20	NA	100	100	50	50	100	0	100	0	5	NA	5	5	2	2	1	2	1	3
498	16116063	19.0476	61.7647	37.8378	21	34	37	23.5294	0	60	63.1579	31.5789	44.4444	0	9.09091	0	4.7619	17	4	15	19	19	18	23	22	11	21
498	16116080	0	46.1538	27.2727	2	13	11	0	0	40	50	25	28.5714	0	16.6667	0	0	1	1	5	8	4	7	1	6	4	7
499	16161975	42.8571	0	19.0476	28	47	42	50	0	0	0	4	41.1765	50	0	0	0	24	4	22	25	25	17	22	17	11	21
499	16161976	40	0	5	30	32	40	46.1538	0	0	0	0	14.2857	33.3333	0	0	0	26	4	13	19	26	14	15	19	11	31
500	16255239	25	93.3333	68.1818	16	15	22	25	NA	100	83.3333	44.4444	84.6154	50	91.6667	100	30	16	NA	9	6	9	13	10	12	8	10
500	16255240	52.9412	100	81.25	17	30	16	42.8571	100	100	100	66.6667	90	62.5	83.3333	100	53.3333	14	3	14	16	6	10	16	6	5	15
501	16292322	27.7778	93.9394	75	18	33	36	45.4545	0	93.3333	94.4444	94.1176	57.8947	0	100	53.8462	100	11	7	15	18	17	19	17	15	13	21
501	16292323	39.5349	94.6429	64.6154	43	56	65	44.7368	0	95	94.4444	91.1765	35.4839	0	93.75	44.4444	90.625	38	5	20	36	34	31	32	48	18	32
502	16334247	93.0233	48.1481	92.8571	43	54	42	96.9697	80	0	100	94.1176	92	95.2381	74.0741	91.6667	96.4286	33	10	28	26	17	25	21	27	12	28
502	16334248	96.4286	38.7097	95.2381	28	31	42	95.6522	100	0	92.3077	100	90.4762	94.4444	82.3529	90	89.4737	23	5	18	13	21	21	18	17	20	19
503	16463288	28	78.5714	51.8519	25	14	27	31.8182	0	78.5714	NA	38.8889	77.7778	20.6897	33.3333	33.3333	29.0323	22	3	14	NA	18	9	29	18	12	31
503	16463289	40	84.6154	60.6061	35	39	66	42.4242	0	84.6154	NA	57.4468	68.4211	15.5556	39.1304	54.2857	8.33333	33	2	39	NA	47	19	45	23	35	36
504	16470203	42.8571	87.5	64.1509	63	168	106	22.2222	94.4444	84.6154	89.3204	45.5882	97.3684	56.5217	91.3043	91.4286	42.5532	45	18	65	103	68	38	46	46	35	47
504	16470204	38.8889	78.9474	50	18	38	22	26.6667	100	68.75	86.3636	26.6667	100	92.3077	100	60	14.2857	15	3	16	22	15	7	13	13	5	7
505	16682560	100	43.1818	96.0784	40	44	51	100	100	86.3636	0	100	93.3333	72.2222	76.1905	33.3333	50	26	14	22	22	21	30	18	21	15	16
505	16682561	92.3077	44.4444	83.3333	13	18	12	90	100	80	0	60	100	44.4444	87.5	75	28.5714	10	3	10	8	5	7	9	8	8	14
506	16716683	20	90	28.2609	50	60	46	0	50	96.875	82.1429	48.1481	0	54.5455	35	0	35.5556	30	20	32	28	27	19	22	40	13	45
506	16716684	33.3333	74.2857	64.2857	15	35	14	0	62.5	66.6667	90.9091	81.8182	0	40.9091	46.1538	0	56.25	7	8	24	11	11	3	22	13	3	16
507	16975465	95.5556	54.1667	82.4561	45	48	57	100	88.2353	96.2963	0	64	96.875	42.8571	22.2222	36	31.0345	28	17	27	21	25	32	21	36	25	29
507	16975466	100	48.8889	65.625	16	45	32	100	100	95.6522	0	35.7143	88.8889	80	60	12.5	14.2857	14	2	23	22	14	18	15	5	8	14
508	17112908	93.3333	16.6667	68.75	15	24	32	91.6667	100	100	0	35.7143	94.4444	22.2222	64.2857	40	77.7778	12	3	4	20	14	18	9	14	5	9
508	17112909	87.5	30.7692	78.5714	8	13	14	83.3333	100	100	0	50	100	16.6667	100	20	75	6	2	4	9	6	8	6	2	5	8
509	17200116	100	43.4783	91.4286	19	23	35	100	100	0	83.3333	94.7368	87.5	93.75	91.6667	25	61.5385	14	5	11	12	19	16	16	12	12	13
509	17200117	87.5	45	84.2105	8	20	19	85.7143	100	0	81.8182	83.3333	85.7143	85.7143	60	0	72.7273	7	1	9	11	12	7	7	5	1	11
510	17205818	100	59.2593	75	25	27	28	100	100	0	100	100	46.1538	91.6667	100	50	50	19	6	11	16	15	13	12	20	10	22
510	17205819	100	37.5	73.913	11	16	23	100	100	0	100	100	50	100	100	40	43.75	8	3	10	6	11	12	8	15	5	16
511	17260043	5	78.125	36.3636	20	32	33	0	25	53.8462	94.7368	56.25	17.6471	26.6667	75	45.4545	76.1905	16	4	13	19	16	17	15	12	11	21
511	17260044	0	60.6061	59.375	1	33	32	NA	0	37.5	82.3529	63.1579	53.8462	41.6667	90.9091	85.7143	80	NA	1	16	17	19	13	12	22	7	15
512	17260148	81.4815	37.5	70.9677	27	32	31	78.2609	100	0	75	86.6667	56.25	78.9474	80	40	68.1818	23	4	16	16	15	16	19	15	10	22
512	17260149	86.2069	39.5349	61.3636	29	43	44	88	75	0	100	100	29.1667	66.6667	95.2381	40	47.619	25	4	26	17	20	24	15	21	15	21
513	17262795	0	57.8947	6.25	15	19	16	0	0	55.5556	60	10	0	100	100	33.3333	45.4545	10	5	9	10	10	6	11	7	3	11
513	17262796	0	50	22.449	33	52	49	0	0	38.4615	61.5385	12.5	32	91.4286	80.6452	30	70	27	6	26	26	24	25	35	31	10	30
514	17277290	88.8889	28.5714	33.3333	18	7	12	92.8571	75	0	100	25	37.5	100	50	NA	20	14	4	5	2	4	8	7	2	NA	10
514	17277291	100	53.125	57.6923	16	32	26	100	100	0	100	60	54.5455	92.3077	40	44.4444	69.2308	12	4	15	17	15	11	13	10	9	13
515	17334498	55.814	100	84.375	43	41	64	51.8519	62.5	100	100	96.9697	70.9677	95.8333	96.1538	60	90.3226	27	16	23	18	33	31	24	26	15	31
515	17334499	44.4444	100	77.7778	9	15	9	37.5	100	100	100	100	50	100	100	16.6667	100	8	1	10	5	5	4	10	4	6	7
516	17345487	91.6667	36.9565	58.8235	36	46	34	92.5926	88.8889	0	77.2727	28.5714	80	95.8333	88.2353	36.3636	86.6667	27	9	24	22	14	20	24	17	11	15
516	17345488	85.7143	35.4839	69.697	14	31	33	81.8182	100	0	78.5714	36.3636	86.3636	100	100	50	92.3077	11	3	17	14	11	22	13	17	8	13
517	17393756	32	91.3043	42.3077	25	23	26	0	88.8889	92.3077	90	42.1053	42.8571	44.4444	42.1053	14.2857	45.4545	16	9	13	10	19	7	9	19	7	11
517	17393757	20	88.8889	68.4211	5	18	19	0	100	81.8182	100	53.8462	100	60	44.4444	0	50	4	1	11	7	13	6	10	9	6	6
518	17409364	100	57.1429	84.6154	4	7	13	100	100	0	100	80	87.5	66.6667	77.7778	100	100	2	2	3	4	5	8	3	9	2	2
518	17409365	96	31.25	91.8919	25	32	37	100	87.5	0	100	88.2353	95	44.4444	100	93.3333	92.8571	17	8	22	10	17	20	18	10	15	14
519	17417218	86.6667	0	72.7273	15	9	11	80	100	0	0	75	71.4286	22.2222	62.5	0	25	10	5	3	6	4	7	9	8	3	8
519	17417219	50	0	45.4545	14	18	22	36.3636	100	0	0	57.1429	40	21.4286	71.4286	33.3333	33.3333	11	3	9	9	7	15	14	7	3	12
520	17502828	38.8889	98.2143	96.2025	54	56	79	0	95.4545	95.2381	100	96.875	95.7447	9.52381	90	66.6667	48	32	22	21	35	32	47	21	40	15	25
520	17502829	25	89.4737	87.5	12	19	16	0	100	100	77.7778	87.5	87.5	0	90	20	33.3333	9	3	10	9	8	8	8	10	5	9
521	17628669	0	47.0588	37.5	10	17	16	0	0	0	88.8889	20	66.6667	0	71.4286	66.6667	0	6	4	8	9	10	6	9	7	9	8
521	17628670	0	46.6667	45	31	45	20	0	0	0	80.7692	30.7692	71.4286	0	55.5556	78.5714	0	20	11	19	26	13	7	12	9	14	15
522	17635894	0	94	73.4694	34	50	49	0	0	100	88.4615	61.5385	86.9565	0	41.1765	86.6667	0	26	8	24	26	26	23	17	17	15	26
522	17635895	0	86.2069	58.3333	23	29	24	0	0	80	92.8571	33.3333	83.3333	0	35.7143	66.6667	0	17	6	15	14	12	12	13	14	9	13
523	17793546	17.0732	85.3659	26	41	41	50	35	0	85.7143	85	0	54.1667	0	44.4444	44.4444	0	20	21	21	20	26	24	22	27	18	14
523	17793547	0	100	16.6667	1	4	6	NA	0	100	100	0	25	0	50	100	0	NA	1	3	1	2	4	1	6	1	3
524	17866037	0	41.9355	39.3939	27	31	33	0	0	0	86.6667	40	38.8889	0	90	33.3333	39.1304	12	15	16	15	15	18	12	20	9	23
524	17866038	0	54.5455	43.3333	29	22	30	0	0	0	100	47.0588	38.4615	0	83.3333	100	40	23	6	10	12	17	13	10	18	5	20
525	17910779	90.9091	0	50	11	7	18	90.9091	NA	0	0	72.7273	14.2857	66.6667	87.5	100	85.7143	11	NA	4	3	11	7	3	8	2	7
525	17910780	47.8261	2.5641	46.3415	23	39	41	57.8947	0	0	4.16667	40	52.381	48.2759	68.4211	100	100	19	4	15	24	20	21	29	19	11	21
526	18068778	97.2222	31.8182	61.7647	36	44	34	95.8333	100	87.5	0	94.1176	29.4118	6.89655	88.2353	81.8182	90.4762	24	12	16	28	17	17	29	17	11	21
526	18068779	94.7368	41.6667	75	19	12	16	94.1176	100	83.3333	0	100	55.5556	22.2222	100	80	92.8571	17	2	6	6	7	9	9	7	10	14
527	18168616	15	100	69.5652	20	16	23	33.3333	0	100	100	100	50	54.5455	0	75	87.5	9	11	4	12	9	14	11	7	4	8
527	18168617	28.9474	100	78.9474	38	31	38	52.381	0	100	100	100	50	40	0	60	86.3636	21	17	15	16	22	16	15	18	10	22
528	18181024	0	71.4286	35.1351	32	35	37	0	0	92.5926	0	6.66667	54.5455	0	0	0	46.6667	17	15	27	8	15	22	6	22	6	15
528	18181025	0	47.3684	27.2727	10	19	22	0	0	81.8182	0	0	60	0	0	0	28.5714	8	2	11	8	12	10	11	17	9	7
529	18198314	83.3333	33.3333	57.1429	6	3	7	83.3333	NA	0	100	66.6667	50	NA	NA	NA	40	6	NA	2	1	3	4	NA	NA	NA	5
529	18198315	90.3846	5.55556	57.5758	52	54	66	89.7959	100	0	100	45.6522	85	100	80	NA	39.0244	49	3	51	3	46	20	1	5	NA	41
530	18237728	100	52	93.5484	30	25	31	100	100	0	100	88.2353	100	78.9474	100	100	64.7059	16	14	12	13	17	14	19	26	17	17
530	18237729	95.4545	44	75.4386	44	50	57	95.8333	95	3.84615	87.5	50	100	85.7143	96.2963	94.7368	44.4444	24	20	26	24	28	29	21	27	19	18
531	18250541	83.871	39.5833	56.0976	62	48	41	86.6667	81.25	0	79.1667	38.0952	75	35	60.8696	50	31.8182	30	32	24	24	21	20	20	23	18	22
531	18250542	81.25	39.1304	44.4444	16	23	27	72.7273	100	0	60	45.4545	43.75	10	55.5556	44.4444	25	11	5	8	15	11	16	10	9	9	8
532	18294707	55.5556	100	73.3333	9	3	15	60	50	NA	100	100	60	100	100	88.8889	0	5	4	NA	3	5	10	9	3	9	2
532	18294852	44.8276	90	61.7647	29	20	34	55.5556	27.2727	100	88.2353	35.2941	88.2353	10.5263	38.4615	0	87.5	18	11	3	17	17	17	19	13	9	8
533	18303178	28	100	66	50	49	50	45.8333	11.5385	100	100	78.2609	55.5556	50	35	61.1111	43.4783	24	26	31	18	23	27	38	20	18	23
533	18303179	28.5714	75	60	7	4	5	40	0	100	66.6667	75	0	60	50	100	50	5	2	1	3	4	1	5	6	2	2
534	18304261	0	94.7368	38.2353	62	38	34	0	0	94.7368	94.7368	0	68.4211	0	0	0	27.2727	28	34	19	19	15	19	10	16	15	11
534	18304262	0	95.8333	28.2609	38	48	46	0	0	100	92	0	44.8276	0	0	0	28.5714	26	12	23	25	17	29	33	11	14	21
535	18316428	92.5926	0.952381	73.5632	54	105	87	92.6829	92.3077	1.92308	0	94.7368	57.1429	64.2857	62.5	92	40.9091	41	13	52	53	38	49	42	40	25	44
535	18316429	87.7551	0.877193	74.1259	98	114	143	84.6154	100	1.72414	0	98.1481	59.5506	75.5556	77.7778	77.193	48.1818	78	20	58	56	54	89	45	81	57	110
536	18317640	100	0	87.5	10	9	8	100	100	0	0	100	75	100	100	100	100	8	2	6	3	4	4	1	8	1	1
536	18317641	94	2.7027	65	50	74	60	96.9697	88.2353	0	5.55556	81.8182	55.2632	80	95.2381	100	44.1176	33	17	38	36	22	38	35	42	21	34
537	19117860	80	0	57.1429	10	5	7	77.7778	100	0	0	66.6667	50	100	100	NA	33.3333	9	1	4	1	3	4	2	3	NA	6
537	19117861	61.9048	0	56.5217	21	20	23	72.7273	50	0	0	45.4545	66.6667	75	23.8095	0	18.1818	11	10	9	11	11	12	12	21	3	11
538	19429223	81.4815	19.0476	60.7143	27	21	28	81.25	81.8182	0	57.1429	66.6667	53.8462	84.6154	47.0588	50	29.4118	16	11	14	7	15	13	13	17	6	17
538	19429224	66.6667	0	50	3	3	2	100	0	0	0	NA	50	0	100	50	0	2	1	2	1	NA	2	3	1	2	3
539	19429241	62.963	20	46.1538	27	20	26	64.7059	60	0	66.6667	35.7143	58.3333	66.6667	43.75	50	35	17	10	14	6	14	12	9	16	6	20
539	19429242	100	0	66.6667	5	2	3	100	100	0	0	100	50	66.6667	100	0	0	3	2	1	1	1	2	3	1	1	3
540	19634841	25	100	93.75	8	14	16	20	33.3333	100	100	100	88.8889	100	100	0	50	5	3	11	3	7	9	6	2	4	8
540	19634932	46.1538	94.4444	62.5	13	18	8	41.6667	100	88.8889	100	100	40	66.6667	83.3333	100	80	12	1	9	9	3	5	6	6	7	5
541	19688913	56	100	85.3659	25	40	41	57.1429	50	100	100	100	68.4211	100	93.3333	0	57.1429	21	4	18	22	22	19	15	15	17	21
541	19688914	60	100	80	5	6	5	33.3333	100	100	NA	100	0	100	100	100	33.3333	3	2	6	NA	4	1	1	2	1	3
542	19859405	85.7143	22.2222	33.3333	14	18	18	90	75	80	0	40	30.7692	18.1818	60	57.1429	87.5	10	4	5	13	5	13	11	5	7	8
542	19859406	82.6087	33.3333	34.4828	23	21	29	75	90.9091	100	0	37.5	30.7692	60.8696	50	44.4444	92.8571	12	11	7	14	16	13	23	16	9	14
543	20018751	31.5789	97.2973	84.0909	38	37	44	0	100	95.4545	100	84.6154	83.3333	42.8571	90	44.4444	0	26	12	22	15	26	18	14	10	18	19
543	20018752	31.25	95.2381	83.3333	16	21	30	8.33333	100	90.9091	100	78.5714	87.5	20	100	11.1111	5.55556	12	4	11	10	14	16	10	7	9	18
544	20073076	16.6667	91.6667	81.8182	6	12	11	0	50	100	75	80	83.3333	50	100	0	40	4	2	8	4	5	6	8	3	1	10
544	20073077	53.5714	96.6667	85.1064	28	30	47	43.4783	100	90.9091	100	84	86.3636	33.3333	88.8889	46.6667	40.9091	23	5	11	19	25	22	15	9	15	22
545	20215124	100	42.8571	90	14	7	10	100	100	0	100	80	100	57.1429	100	100	100	13	1	4	3	5	5	7	3	6	3
545	20215125	88.3721	40.4762	86.6667	43	42	45	96.9697	60	0	89.4737	94.4444	81.4815	68.4211	100	94.4444	93.1034	33	10	23	19	18	27	19	25	18	29
546	20313832	100	36.8421	62.5	22	19	32	100	100	87.5	0	89.4737	23.0769	36.3636	18.1818	80	28.5714	15	7	8	11	19	13	11	11	5	7
546	20313833	88.8889	37.8378	45.6522	27	37	46	86.9565	100	100	0	83.3333	21.4286	25	41.1765	73.6842	38.0952	23	4	14	23	18	28	12	17	19	21
547	20331386	0	45.4545	22.2222	6	22	27	0	0	7.69231	100	6.66667	41.6667	0	100	0	25	4	2	13	9	15	12	4	8	6	4
547	20331387	0	53.5714	10.5263	17	28	38	0	0	0	88.2353	0	23.5294	0	100	0	50	12	5	11	17	21	17	13	15	8	26
548	20382120	60.8696	0	40	23	10	5	35.7143	100	0	0	100	25	0	25	0	40	14	9	7	3	1	4	7	4	6	5
548	20382121	76.4706	0	31.5789	17	12	19	72.7273	83.3333	0	0	40	22.2222	0	40	0	40	11	6	5	7	10	9	6	5	2	5
549	20410547	42.1053	94.6429	60.3448	19	56	58	47.0588	0	91.8919	100	81.8182	47.2222	37.037	0	92.3077	94.1176	17	2	37	19	22	36	27	33	13	17
549	20410548	44.4444	88.5714	65.2174	18	35	46	53.3333	0	88.8889	88.2353	86.3636	45.8333	61.5385	0	100	95	15	3	18	17	22	24	13	16	10	20
550	20601074	53.3333	94.7368	62.5	15	19	16	46.1538	100	87.5	100	75	50	100	83.3333	83.3333	100	13	2	8	11	8	8	2	6	6	5
550	20601075	44.4444	100	75	9	19	16	33.3333	66.6667	100	100	90	50	28.5714	100	100	72.7273	6	3	8	11	10	6	7	6	9	11
551	20660327	76.9231	23.8095	71.4286	13	21	14	66.6667	100	0	100	75	66.6667	0	90	100	83.3333	9	4	16	5	8	6	9	10	5	12
551	20660328	100	42.8571	70	12	14	20	100	100	0	85.7143	75	66.6667	0	86.6667	50	100	6	6	7	7	8	12	3	15	2	7
552	20929601	52.381	100	54.2857	21	27	35	37.5	100	100	100	87.5	26.3158	33.3333	100	64.2857	100	16	5	15	12	16	19	6	16	14	10
552	20929602	53.3333	96.9697	64	15	33	25	36.3636	100	94.7368	100	92.3077	33.3333	64.2857	91.6667	33.3333	91.6667	11	4	19	14	13	12	14	12	9	12
553	20964317	57.1429	100	76.9231	21	29	26	40	100	100	100	84.6154	69.2308	81.8182	36.3636	66.6667	86.3636	15	6	18	11	13	13	11	11	9	22
553	20964318	23.5294	91.3043	65	17	23	20	7.69231	75	90.9091	91.6667	100	41.6667	70.5882	57.1429	37.5	72.7273	13	4	11	12	8	12	17	21	8	11
554	20966272	45.4545	100	85.2941	22	26	34	29.4118	100	100	100	100	70.5882	100	94.7368	100	100	17	5	11	15	17	17	12	19	7	14
554	20966273	38.4615	95.2381	70.8333	13	21	24	36.3636	50	100	90.9091	88.8889	60	100	100	100	100	11	2	10	11	9	15	14	11	14	23
555	21068070	36.6667	96.2963	95.4545	30	27	22	27.2727	42.1053	92.8571	100	92.3077	100	29.4118	70.5882	50	30	11	19	14	13	13	9	17	17	10	20
555	21068071	47.619	96.6667	90.9091	21	30	33	40	66.6667	93.3333	100	88.8889	93.3333	33.3333	80	72.7273	31.25	15	6	15	15	18	15	12	15	11	16
556	21225337	92.3077	4.16667	23.5294	13	24	17	92.3077	NA	0	8.33333	50	9.09091	31.25	50	40	22.2222	13	NA	12	12	6	11	16	8	5	9
556	21225339	85.7143	38.4615	47.0588	14	26	17	92.3077	0	38.4615	38.4615	83.3333	27.2727	31.25	50	40	33.3333	13	1	13	13	6	11	16	8	5	9
557	21391612	52.7273	95.5224	94.2029	55	67	69	40.9091	100	96.5517	94.7368	96.875	91.8919	96.4286	86.6667	95.6522	85.7143	44	11	29	38	32	37	28	15	23	42
557	21391787	0	100	50	1	2	2	0	NA	NA	100	50	NA	100	100	100	100	1	NA	NA	2	2	NA	2	2	1	1
558	21608352	45	88.8889	82.0513	20	18	39	37.5	75	93.75	50	70.5882	90.9091	83.3333	86.3636	100	72.7273	16	4	16	2	17	22	18	22	14	22
558	21608353	55	100	66.6667	20	11	15	42.8571	83.3333	100	NA	50	85.7143	100	90	87.5	100	14	6	11	NA	8	7	7	10	8	13
559	21678069	92.3077	0	82.1429	13	12	28	87.5	100	0	NA	61.5385	100	0	60	40	45.4545	8	5	12	NA	13	15	6	5	5	11
559	21678070	97.0588	6.66667	72.5	34	15	40	100	90.9091	0	100	65	80	0	37.037	41.6667	38.4615	23	11	14	1	20	20	20	27	12	13
560	21778920	31.25	100	75	16	19	16	0	71.4286	100	100	57.1429	88.8889	54.5455	91.6667	87.5	75	9	7	10	9	7	9	11	12	8	8
560	21778921	9.09091	98.7179	77.9661	22	78	59	0	66.6667	100	96.875	55.5556	96.875	50	96.4286	97.9592	60.6061	19	3	46	32	27	32	34	56	49	33
561	22178255	0	100	50	10	7	12	0	0	100	100	100	25	0	75	100	0	8	2	3	4	4	8	2	4	1	2
561	22178256	5.26316	100	71.4286	19	16	28	0	50	100	100	94.4444	30	0	84.2105	42.8571	41.1765	17	2	6	10	18	10	14	19	7	17
562	22194391	46.6667	95	92	15	20	25	54.5455	25	100	88.8889	90	93.3333	75	100	100	100	11	4	11	9	10	15	16	13	6	10
562	22194392	53.3333	94.2857	88.2353	30	35	51	61.1111	41.6667	95	93.3333	84.6154	92	75	90.4762	84.6154	88.2353	18	12	20	15	26	25	24	21	13	17
563	22211204	47.0588	92	85.7143	17	25	28	53.8462	25	93.3333	90	81.8182	88.2353	0	72.7273	0	22.2222	13	4	15	10	11	17	27	11	4	9
563	22211205	40.4762	93.8776	81.4815	42	49	27	47.3684	34.7826	95	93.1034	75	86.6667	0	66.6667	25	31.25	19	23	20	29	12	15	11	12	8	16
564	22310314	89.7436	44.8276	70.9677	39	29	31	91.6667	86.6667	5.88235	100	65	81.8182	72.7273	60	50	90.4762	24	15	17	12	20	11	11	15	12	21
564	22310315	85.7143	33.3333	77.7778	7	12	9	85.7143	NA	0	80	60	100	100	80	NA	50	7	NA	7	5	5	4	4	5	NA	2
565	22312097	100	50	83.3333	7	6	6	100	100	0	100	75	100	60	66.6667	100	100	5	2	3	3	4	2	5	3	1	3
565	22312098	95.8333	46.3415	94.7368	48	41	38	96.2963	95.2381	0	90.4762	83.3333	100	76.4706	100	70	85.7143	27	21	20	21	12	26	17	15	10	14
566	22595066	46.6667	100	57.1429	15	4	21	42.8571	50	100	NA	40	72.7273	80	40	100	46.1538	7	8	4	NA	10	11	5	5	4	13
566	22595067	41.6667	100	59.4937	48	24	79	34.4828	52.6316	100	NA	50	71.4286	74.1935	67.5676	88.8889	32.3529	29	19	24	NA	44	35	31	37	18	34
567	22665642	31.25	97.5	69.2308	32	40	52	31.5789	30.7692	95.4545	100	17.6471	94.2857	77.2727	50	45.4545	75	19	13	22	18	17	35	22	18	11	28
567	22665643	26.4706	96.2963	63.6364	34	27	22	0	40.9091	95.4545	100	27.2727	100	66.6667	77.7778	57.1429	78.5714	12	22	22	5	11	11	12	18	7	14
568	22730775	70	0	56	30	19	25	57.1429	100	0	0	0	93.3333	7.14286	36.8421	25	0	21	9	7	12	10	15	14	19	4	16
568	22730776	83.3333	0	50	12	11	12	50	100	0	0	0	85.7143	0	42.8571	0	0	4	8	6	5	5	7	8	7	2	10
569	22736349	80	0	57.1429	15	27	28	80	80	0	0	37.5	83.3333	0	22.2222	40	0	10	5	14	13	16	12	12	18	5	6
569	22736350	83.3333	0	66.6667	6	3	9	80	100	0	0	75	60	0	50	33.3333	0	5	1	1	2	4	5	5	2	3	5
570	22780313	100	20	66.6667	2	5	6	100	NA	0	100	60	100	40	0	100	0	2	NA	4	1	5	1	5	4	2	1
570	22780314	82.8829	35.9649	69.7183	111	114	142	95.8333	58.9744	0	82	49.3151	91.3043	40.3509	43.0769	74.2857	54.386	72	39	64	50	73	69	57	65	35	57
571	22875237	100	57.1429	75	9	7	12	100	100	0	80	100	25	83.3333	100	100	87.5	5	4	2	5	8	4	6	4	4	8
571	22875238	100	51.3514	64.5161	23	37	31	100	100	0	90.4762	89.4737	25	94.1176	28.5714	90	100	12	11	16	21	19	12	17	14	10	16
572	23127725	92	42	80.4348	50	50	46	94.4444	90.625	0	87.5	52.6316	100	92.3077	86.3636	88.2353	95.4545	18	32	26	24	19	27	13	22	17	22
572	23127726	100	50	63.6364	8	12	11	100	100	0	100	42.8571	100	100	71.4286	NA	75	7	1	6	6	7	4	5	7	NA	8
573	23224415	50	100	81.8182	2	12	11	50	NA	100	100	75	85.7143	100	40	75	100	2	NA	6	6	4	7	3	5	4	8
573	23224416	36.3636	100	70	33	50	50	45.4545	18.1818	100	100	40.9091	92.8571	87.5	57.6923	48	78.9474	22	11	19	31	22	28	24	26	25	19
574	23234789	40	94.1176	56.5217	15	17	23	33.3333	66.6667	100	90	44.4444	100	100	42.8571	85.7143	87.5	12	3	7	10	18	5	8	14	7	16
574	23234790	33.3333	100	75	18	28	12	42.8571	0	100	100	50	87.5	80	63.6364	66.6667	100	14	4	13	15	4	8	10	11	6	9
575	23923519	100	22.2222	50	5	9	4	100	NA	40	0	66.6667	0	66.6667	0	50	0	5	NA	5	4	3	1	6	5	2	3
575	23923520	67.8571	21.2121	33.3333	28	33	30	61.1111	80	58.3333	0	25	42.8571	38.8889	0	66.6667	0	18	10	12	21	16	14	18	16	6	9
576	24051239	44.4444	92.3077	85.7143	9	13	7	50	0	80	100	80	100	30	33.3333	30	100	8	1	5	8	5	2	10	6	10	7
576	24051240	57.1429	100	75	21	46	40	68.75	20	100	100	47.3684	100	43.4783	46.6667	33.3333	95.8333	16	5	29	17	19	21	23	15	18	24
577	24257792	30	88.4615	69.697	20	26	33	42.8571	0	83.3333	92.8571	84.2105	50	71.4286	33.3333	87.5	92.3077	14	6	12	14	19	14	21	12	8	13
577	24257793	42.8571	100	83.3333	7	9	12	60	0	100	100	100	66.6667	80	100	100	100	5	2	6	3	6	6	5	3	1	3
578	24300286	47.3684	97.2973	73.1707	19	37	41	56.25	0	90	100	90	57.1429	85	43.75	75	63.6364	16	3	10	27	20	21	20	16	12	22
578	24300287	40	100	67.6471	15	32	34	54.5455	0	100	100	87.5	50	63.6364	14.2857	50	64.7059	11	4	18	14	16	18	11	7	14	17
579	24301701	48.6486	97.8261	68.6275	37	46	51	66.6667	0	95.6522	100	92.5926	41.6667	72.2222	19.3548	70	80	27	10	23	23	27	24	18	31	20	25
579	24301702	50	96.6667	55.5556	12	30	27	50	NA	100	93.3333	81.25	18.1818	70	53.8462	85.7143	86.6667	12	NA	15	15	16	11	10	13	7	15
580	24319795	100	11.1111	85.7143	10	9	7	100	NA	20	0	66.6667	100	33.3333	80	100	28.5714	10	NA	5	4	3	4	3	5	2	7
580	24319796	70	0	31.8182	40	42	44	84.375	12.5	0	0	33.3333	30	50	78.9474	78.5714	47.0588	32	8	20	22	24	20	10	19	14	17
581	24353071	64.7059	0	59.2593	17	30	27	61.5385	75	0	0	54.5455	62.5	0	35.7143	90.9091	0	13	4	17	13	11	16	15	14	11	11
581	24353072	52.381	0	42.4242	21	21	33	50	55.5556	0	0	33.3333	47.619	0	42.8571	100	0	12	9	8	13	12	21	13	14	8	10
582	24356533	53.3333	0	38.4615	15	11	13	50	66.6667	0	0	20	50	0	0	0	0	12	3	4	7	5	8	5	5	2	7
582	24356534	47.3684	0	40	19	13	15	50	44.4444	0	0	37.5	42.8571	0	0	25	0	10	9	5	8	8	7	9	7	8	16
583	24363771	25	100	88.8889	4	9	9	25	NA	100	100	100	80	0	80	100	0	4	NA	6	3	4	5	2	5	1	3
583	24363772	50	95.4545	57.1429	18	22	21	40	100	100	90.9091	85.7143	42.8571	37.5	81.8182	85.7143	42.8571	15	3	11	11	7	14	16	11	7	14
584	24381520	100	42.8571	66.6667	4	7	3	100	NA	0	100	50	100	NA	100	NA	100	4	NA	4	3	2	1	NA	1	NA	1
584	24381521	94.5946	32.6087	72.7273	37	46	55	85.7143	100	0	88.2353	78.2609	68.75	38.4615	77.2727	100	80	14	23	29	17	23	32	26	22	14	15
585	24382513	40.625	89.4737	69.697	32	38	33	47.3684	30.7692	85.7143	94.1176	92.8571	52.6316	53.3333	66.6667	81.25	37.5	19	13	21	17	14	19	15	15	16	8
585	24382514	28.5714	88.8889	69.2308	7	9	13	28.5714	NA	100	83.3333	100	20	100	25	50	0	7	NA	3	6	8	5	2	4	2	3
586	24398681	44	100	94.1176	25	33	34	42.1053	50	100	100	92.3077	95.2381	78.5714	100	100	68.75	19	6	16	17	13	21	14	16	13	16
586	24398682	42.8571	94.4444	84.2105	14	18	19	33.3333	60	90	100	91.6667	71.4286	71.4286	83.3333	100	45.4545	9	5	10	8	12	7	7	6	7	11
587	24443589	71.4286	0	23.6364	49	36	55	86.9565	57.6923	0	0	41.9355	0	28.5714	72	50	75	23	26	20	16	31	24	14	25	14	20
587	24443590	75	0	12.5	4	10	8	75	NA	0	0	25	0	80	50	100	75	4	NA	6	4	4	4	5	4	1	4
588	24542939	94.5946	51.8519	77.4194	37	27	31	92.8571	95.6522	100	0	88.8889	61.5385	75	100	100	100	14	23	14	13	18	13	12	8	7	7
588	24542940	100	58.3333	60	16	12	5	100	100	100	0	100	33.3333	81.8182	100	100	100	11	5	7	5	2	3	11	9	5	6
589	24856162	84.375	28.5714	82.8571	32	35	35	85.1852	80	62.5	0	78.5714	85.7143	85.7143	77.7778	100	70	27	5	16	19	14	21	14	18	8	20
589	24856163	88.8889	45	80.9524	9	20	21	100	75	100	0	77.7778	83.3333	63.6364	86.6667	100	66.6667	5	4	9	11	9	12	11	15	3	3
590	24885503	100	0	64.7059	16	15	17	100	100	0	0	100	45.4545	71.4286	92.8571	20	50	15	1	8	7	6	11	7	14	5	6
590	24885504	80	0	50	10	8	6	100	33.3333	0	0	100	25	28.5714	100	75	33.3333	7	3	4	4	2	4	7	1	4	3
591	24893677	0	93.3333	45	12	30	20	0	0	100	88.8889	50	43.75	0	17.6471	88.8889	20	11	1	12	18	4	16	8	17	9	15
591	24893678	15.3846	100	55	13	19	20	0	100	100	100	50	60	0	62.5	42.8571	20	11	2	10	9	10	10	11	8	7	10
592	24898663	14.7059	69.2308	42.1053	34	26	19	0	22.7273	54.5455	80	45.4545	37.5	0	25	16.6667	37.5	12	22	11	15	11	8	5	4	6	8
592	24898664	0	72.7273	50	4	11	8	0	NA	50	85.7143	66.6667	40	NA	33.3333	0	50	4	NA	4	7	3	5	NA	3	2	2
593	24899482	25	100	50	16	8	10	0	40	100	100	50	50	NA	0	50	0	6	10	6	2	6	4	NA	1	2	1
593	24899483	35.2941	92	61.1111	17	25	18	0	54.5455	100	77.7778	58.3333	66.6667	0	46.6667	40	42.8571	6	11	16	9	12	6	13	15	5	7
594	25075152	47.3684	92.8571	61.9048	19	28	21	57.1429	20	100	88.2353	46.6667	100	77.7778	85.7143	57.1429	64.7059	14	5	11	17	15	6	9	7	7	17
594	25075153	47.7273	97.7273	68.8889	44	44	45	51.7241	40	95.6522	100	47.8261	90.9091	88.4615	84.6154	77.7778	39.1304	29	15	23	21	23	22	26	13	18	23
595	25085078	44.4444	97.0588	86.9565	18	34	23	50	33.3333	100	95.4545	85.7143	87.5	92.3077	85.7143	85.7143	33.3333	12	6	12	22	7	16	13	7	7	9
595	25085079	42.4242	97.3684	82.8571	33	38	35	44	37.5	100	93.3333	42.8571	92.8571	100	94.7368	100	45	25	8	23	15	7	28	20	19	15	20
596	25091409	56.25	0	24	32	38	50	47.619	72.7273	0	0	46.1538	0	0	38.4615	0	43.75	21	11	15	23	26	24	19	26	20	16
596	25091410	50	0	38.8889	8	15	18	60	33.3333	0	0	58.3333	0	0	50	0	36.3636	5	3	6	9	12	6	9	6	9	11
597	25092315	36	94.4444	72.7273	25	36	33	31.5789	50	93.3333	95.2381	43.75	100	85.7143	92.3077	100	65	19	6	15	21	16	17	14	13	12	20
597	25092316	36.6667	95	66.6667	30	40	33	22.2222	58.3333	90.9091	100	16.6667	95.2381	84.2105	82.3529	100	55.5556	18	12	22	18	12	21	19	17	10	18
598	25097250	50	0	28.5714	12	14	7	33.3333	100	0	0	50	0	50	0	33.3333	100	9	3	5	9	4	3	2	3	3	4
598	25097251	66.1972	3.80952	21.7391	71	105	92	46.5116	96.4286	3.38983	4.34783	45.2381	2	41.6667	2.12766	29.7297	85.4545	43	28	59	46	42	50	48	47	37	55
599	25106386	36.2069	81.25	67.5676	58	48	37	47.0588	31.7073	80	82.6087	61.1111	73.6842	20	0	81.8182	50	17	41	25	23	18	19	20	12	11	16
599	25106387	0	100	50	1	1	2	NA	0	NA	100	0	100	NA	0	NA	NA	NA	1	NA	1	1	1	NA	1	NA	NA
600	25506954	50	0	33.3333	12	29	24	57.1429	40	0	0	33.3333	33.3333	0	0	57.1429	0	7	5	12	17	12	12	15	21	7	8
600	25506955	66.6667	0	48.1481	24	23	27	64.7059	71.4286	0	0	36.3636	56.25	0	0	81.8182	0	17	7	12	11	11	16	20	11	11	11
601	25633557	81.8182	0	57.1429	11	15	14	100	33.3333	0	0	33.3333	75	33.3333	50	0	62.5	8	3	7	8	6	8	9	4	2	8
601	25633558	73.913	0	72.2222	23	19	18	92.3077	50	0	0	50	90	10	80	61.5385	45.4545	13	10	13	6	8	10	10	15	13	11
602	25634535	82.5	0	55	40	49	40	87.8788	57.1429	0	0	0	88	28.5714	86.6667	6.66667	15.625	33	7	28	21	15	25	21	15	15	32
602	25634536	66.6667	6.66667	61.1111	9	15	18	75	0	0	12.5	0	84.6154	33.3333	100	25	50	8	1	7	8	5	13	3	2	4	6
603	25700945	87.1795	46.1538	65.625	39	52	64	100	64.2857	0	88.8889	30	97.0588	38.4615	51.7241	75	84.6154	25	14	25	27	30	34	26	29	20	26
603	25700946	93.75	44.4444	59.4595	16	27	37	92.3077	100	0	85.7143	23.5294	90	17.6471	54.5455	62.5	100	13	3	13	14	17	20	17	11	8	17
604	25733851	100	0	75	15	13	16	100	100	0	0	33.3333	100	71.4286	85.7143	40	0	13	2	7	6	6	10	7	14	5	6
604	25733852	96	0	64.7059	25	27	34	100	90.9091	0	0	36.8421	100	90	40	57.1429	0	14	11	13	14	19	15	10	10	7	11
605	25792679	22.2222	100	94.4444	9	8	18	20	25	100	100	100	85.7143	80	75	100	100	5	4	3	5	11	7	10	4	2	14
605	25792680	55.5556	95.7447	83.6735	36	47	49	56	54.5455	92	100	82.3529	84.375	75	96	64.2857	85	25	11	25	22	17	32	28	25	14	20
606	25828229	85.7143	0	50	7	6	6	100	0	0	0	75	0	0	0	0	100	6	1	2	4	4	2	1	1	1	1
606	25828230	73.3333	0	55.5556	15	14	27	91.6667	0	0	0	66.6667	41.6667	9.09091	71.4286	44.4444	33.3333	12	3	8	6	15	12	11	14	9	9
607	25862459	71.4286	0	44.186	35	46	43	76.9231	55.5556	0	0	55	34.7826	17.8571	46.1538	33.3333	34.6154	26	9	27	19	20	23	28	26	18	26
607	25862460	71.4286	0	38.4615	21	21	26	70.5882	75	0	0	63.6364	20	12.5	20	33.3333	55.5556	17	4	12	9	11	15	8	5	6	9
608	25888879	22.2222	86.9565	70.3704	18	23	27	0	100	88.8889	85.7143	45.4545	87.5	37.5	0	57.1429	88.8889	14	4	9	14	11	16	8	13	7	9
608	25888880	26.6667	88.8889	58.8235	15	18	17	0	44.4444	100	83.3333	62.5	55.5556	22.2222	0	28.5714	90.9091	6	9	6	12	8	9	9	4	7	11
609	25902686	15	92.8571	68.254	40	56	63	0	66.6667	92.3077	93.3333	90	48.4848	63.6364	44.8276	33.3333	0	31	9	26	30	30	33	33	29	21	30
609	25902687	9.09091	93.75	62.5	11	16	16	0	100	100	88.8889	100	40	57.1429	60	66.6667	0	10	1	7	9	6	10	7	10	6	5
610	25923874	55.5556	0	26.6667	9	3	15	62.5	0	0	0	25	28.5714	0	80	0	0	8	1	2	1	8	7	2	5	3	5
610	25923875	53.1915	0	23.0769	47	19	39	61.2903	37.5	0	0	23.8095	22.2222	0	68.4211	0	0	31	16	11	8	21	18	6	19	8	15
611	26027481	80	0	57.1429	20	24	35	100	0	0	0	66.6667	47.0588	40	58.3333	0	88.2353	16	4	11	13	18	17	10	12	6	17
611	26027482	77.7778	0	58.8235	9	20	17	100	0	0	0	80	50	42.8571	41.6667	0	91.6667	7	2	14	6	5	12	7	12	8	12
612	26028443	66.6667	0	13.3333	9	22	30	75	0	0	0	0	33.3333	22.2222	46.1538	0	75	8	1	11	11	18	12	18	13	4	8
612	26028444	40	0	16.9231	35	52	65	53.8462	0	0	0	0	39.2857	36.1702	50	0	92.3077	26	9	27	25	37	28	47	36	13	26
613	26032649	70	0	12.5	10	7	8	100	25	0	0	0	16.6667	28.5714	37.5	0	40	6	4	5	2	2	6	7	8	7	5
613	26032650	48.8889	0	14.5833	45	45	48	88	0	0	0	0	28	33.3333	46.6667	0	83.3333	25	20	17	28	23	25	24	30	15	18
614	26131905	66.6667	0	45.8333	18	15	24	53.8462	100	0	0	50	42.8571	17.6471	0	37.5	93.75	13	5	6	9	10	14	17	8	8	16
614	26131906	63.1579	0	41.6667	19	27	36	56.25	100	0	0	52.9412	31.5789	21.4286	7.69231	62.5	85.7143	16	3	13	14	17	19	14	13	8	14
615	26147911	100	43.75	81.8182	25	32	33	100	100	0	93.3333	72.2222	93.3333	0	30	88.8889	53.8462	21	4	17	15	18	15	14	20	9	13
615	26147912	86.3636	45.1613	85.2941	22	31	34	94.4444	50	0	87.5	90	78.5714	0	42.1053	100	40	18	4	15	16	20	14	16	19	6	15
616	26232194	28.5714	100	77.7778	7	11	18	40	0	100	100	88.8889	66.6667	25	33.3333	77.7778	100	5	2	3	8	9	9	4	3	9	7
616	26232195	36.3636	84.8485	72.5	44	33	40	27.7778	42.3077	85.7143	84.2105	86.3636	55.5556	31.25	37.5	42.8571	62.5	18	26	14	19	22	18	16	24	7	16
617	26264309	91.3043	42.3077	72.7273	23	26	33	95	66.6667	6.25	100	50	94.1176	86.6667	56.25	100	33.3333	20	3	16	10	16	17	15	16	10	9
617	26264310	100	54.5455	66.6667	40	44	36	100	100	0	92.3077	37.5	90	90.4762	35.7143	94.7368	47.0588	29	11	18	26	16	20	21	14	19	17
618	26426207	80	21.0526	68.1818	15	19	22	66.6667	100	0	66.6667	69.2308	66.6667	42.8571	16.6667	60	100	9	6	13	6	13	9	7	6	5	11
618	26426208	84.375	30.7692	58.8235	32	13	17	60	95.4545	0	57.1429	33.3333	87.5	75	57.1429	100	92.8571	10	22	6	7	9	8	8	7	4	14
619	26469980	83.3333	0	42.8571	6	4	7	50	100	0	0	100	0	0	100	50	100	2	4	1	3	3	4	1	2	2	5
619	26469981	63.3333	0	58.1081	90	85	74	43.5897	78.4314	0	0	81.5789	33.3333	0	85.1852	65.3846	82.9268	39	51	48	37	38	36	32	27	26	41
620	26502518	66.6667	0	36.3636	15	13	11	54.5455	100	0	0	50	20	0	0	100	80	11	4	7	6	6	5	5	4	4	5
620	26502519	66.6667	0	47.0588	30	46	34	52.6316	90.9091	0	0	53.8462	42.8571	0	44.4444	100	95	19	11	19	27	13	21	15	18	6	20
621	26526758	89.7959	0	67.6471	49	47	68	90.9091	87.5	0	0	45.7143	90.9091	35	85.7143	18.1818	29.4118	33	16	21	26	35	33	20	28	22	34
621	26526759	100	0	77.7778	6	8	9	100	NA	0	0	60	100	60	100	50	66.6667	6	NA	6	2	5	4	5	6	4	9
622	26577371	39.1304	80.7692	52	23	26	25	42.8571	0	85	66.6667	44.4444	56.25	11.1111	23.5294	57.1429	66.6667	21	2	20	6	9	16	9	17	7	9
622	26577372	22.2222	82.3529	52.6316	9	17	19	50	0	85.7143	80	41.6667	71.4286	20	27.2727	50	26.6667	4	5	7	10	12	7	15	11	8	15
623	26646031	62.7907	0	20	43	35	35	96.4286	0	0	0	0	38.8889	0	44.4444	76.9231	44	28	15	16	19	17	18	17	18	13	25
623	26646032	80	0	33.3333	15	15	18	92.3077	0	0	0	0	50	0	36.3636	77.7778	14.2857	13	2	8	7	6	12	9	11	9	7
624	26710952	95	54.2857	91.6667	20	35	36	92.3077	100	94.7368	6.25	84.2105	100	60	82.3529	85.7143	100	13	7	19	16	19	17	15	17	7	11
624	26710953	100	30	92.8571	12	10	14	100	100	100	0	85.7143	100	42.8571	77.7778	100	83.3333	11	1	3	7	7	7	7	9	4	6
625	26857102	57.1429	0	31.25	14	16	16	100	0	0	0	0	83.3333	0	0	0	0	8	6	7	9	10	6	6	9	3	10
625	26857103	73.6842	0	35.4839	19	22	31	93.3333	0	0	0	0	73.3333	0	0	0	0	15	4	14	8	16	15	11	6	4	11
626	26983927	25	86.6667	62.5	20	15	16	14.2857	50	100	75	100	0	50	86.6667	100	94.4444	14	6	7	8	10	6	10	15	5	18
626	26983928	37.5	88.0952	76.1905	24	42	21	36.3636	50	79.1667	100	100	0	52.381	53.3333	88.8889	88	22	2	24	18	16	5	21	15	9	25
627	27004841	10	83.7209	24	20	43	25	0	66.6667	86.6667	82.1429	46.1538	0	90.9091	94.7368	64.2857	90.9091	17	3	15	28	13	12	11	19	14	11
627	27004842	9.09091	88.2353	21.8182	44	34	55	0	40	88.8889	87.5	40	0	85	68.4211	90.9091	80	34	10	18	16	30	25	20	19	11	30
628	27007254	100	46.2963	61.9048	27	54	42	100	100	100	0	37.5	94.4444	77.4194	92.3077	93.3333	88.2353	22	5	25	29	24	18	31	26	15	17
628	27007255	95.6522	37.5	77.7778	23	32	45	94.7368	100	92.3077	0	52.6316	96.1538	73.6842	100	87.5	86.9565	19	4	13	19	19	26	19	18	16	23
629	27010761	7.14286	66.6667	22.7273	42	33	22	0	23.0769	55.5556	70.8333	41.6667	0	8.69565	71.4286	50	66.6667	29	13	9	24	12	10	23	7	6	6
629	27010762	15.7895	69.2308	35.2941	19	13	17	0	60	0	75	85.7143	0	23.5294	66.6667	42.8571	40	14	5	1	12	7	10	17	12	7	5
630	27019042	100	60	80	15	5	5	100	100	0	100	50	100	33.3333	33.3333	NA	42.8571	8	7	2	3	2	3	3	3	NA	7
630	27019043	95	41.6667	80	20	24	15	93.75	100	0	90.9091	66.6667	100	81.8182	50	50	64.7059	16	4	13	11	9	6	11	14	6	17
631	27033053	90	40	80	10	10	15	100	66.6667	0	100	90.9091	50	100	88.8889	100	100	7	3	6	4	11	4	5	9	3	5
631	27033054	96.4286	47.0588	54.5455	28	34	33	100	92.8571	0	100	85.7143	31.5789	60	76.4706	57.1429	83.3333	14	14	18	16	14	19	15	17	7	12
632	27135097	95.4545	40.4762	93.75	22	42	48	100	91.6667	0	94.4444	90	96.4286	84.6154	47.619	100	95.6522	10	12	24	18	20	28	26	21	16	23
632	27135098	100	50	92.3077	12	18	13	100	100	0	90	100	85.7143	87.5	60	100	100	9	3	8	10	6	7	8	10	2	8
633	27236095	69.4444	0	47.7273	36	63	44	62.963	88.8889	0	0	91.3043	0	66.6667	42.3077	0	89.2857	27	9	33	30	23	21	18	26	21	28
633	27236096	70.5882	0	55.814	17	27	43	70	71.4286	0	0	92.3077	0	58.8235	56.25	0	91.6667	10	7	12	15	26	17	17	16	11	12
634	27245151	47.5	89.5833	72	40	48	50	39.3939	85.7143	84.6154	95.4545	58.3333	84.6154	86.3636	52.381	83.3333	0	33	7	26	22	24	26	22	21	12	25
634	27245152	45	93.9394	64.1509	40	66	53	33.3333	100	87.0968	100	44.4444	84.6154	84	52.9412	88.8889	4.87805	33	7	31	35	27	26	25	17	18	41
635	27353229	95.5556	0	69.5652	45	50	69	95.122	100	0	0	90.625	51.3514	96.4286	87.5	100	96.7742	41	4	27	23	32	37	28	24	16	31
635	27353230	100	0	65.7143	22	36	35	100	100	0	0	82.6087	33.3333	100	90	90.9091	100	15	7	16	20	23	12	23	10	11	20
636	27357783	95.4545	33.3333	85	22	24	20	94.7368	100	80	0	87.5	83.3333	90	81.8182	85.7143	81.8182	19	3	10	14	8	12	10	11	7	11
636	27357784	93.9394	40	76.9231	33	35	39	95.4545	90.9091	73.6842	0	89.4737	65	100	77.7778	89.4737	75	22	11	19	16	19	20	8	27	19	20
637	27357927	100	50	93.75	11	24	16	100	100	92.3077	0	85.7143	100	77.7778	44.4444	42.8571	50	10	1	13	11	7	9	9	9	7	8
637	27357928	95.8333	45	82.7586	24	40	29	95	100	90	0	80	85.7143	52.9412	54.1667	45.4545	55.5556	20	4	20	20	15	14	17	24	11	18
638	27371158	8.33333	53.3333	25.9259	12	15	27	0	33.3333	0	100	87.5	0	0	0	0	0	9	3	7	8	8	19	7	12	7	15
638	27371159	0	65	36.3636	15	20	22	0	0	0	100	100	0	15.3846	0	0	0	12	3	7	13	8	14	13	6	9	11
639	27375541	40	86.3636	81.25	20	44	48	57.1429	0	81.8182	90.9091	52.6316	100	0	71.4286	50	84.2105	14	6	22	22	19	29	10	14	14	19
639	27375542	26.3158	93.75	64.7059	19	32	34	38.4615	0	94.1176	93.3333	46.6667	78.9474	0	88.8889	50	91.6667	13	6	17	15	15	19	16	18	8	12
640	27395255	8.33333	62.5	31.25	12	16	16	0	100	55.5556	71.4286	45.4545	0	75	11.1111	25	100	11	1	9	7	11	5	8	9	4	8
640	27395256	0	66.6667	17.6471	9	21	17	0	0	75	64.7059	27.2727	0	100	37.5	50	75	7	2	4	17	11	6	5	8	10	8
641	27398390	0	55.5556	6.66667	4	9	15	0	0	100	0	16.6667	0	16.6667	20	33.3333	100	3	1	5	4	6	9	6	10	3	8
641	27398391	20.9302	63.0435	26.4151	43	46	53	0	47.3684	93.5484	0	60.8696	0	23.0769	31.5789	50	75	24	19	31	15	23	30	13	19	14	20
642	27662430	100	44.4444	88.8889	18	18	18	100	100	72.7273	0	75	100	76.9231	57.1429	75	52.6316	16	2	11	7	8	10	13	14	8	19
642	27662431	91.6667	41.5094	85.2459	48	53	61	90.4762	100	88	0	88.2353	81.4815	77.4194	59.2593	57.1429	65.7143	42	6	25	28	34	27	31	27	14	35
643	27713103	91.6667	36.3636	88.8889	12	11	18	100	75	100	0	66.6667	100	44.4444	44.4444	100	85.7143	8	4	4	7	6	12	9	9	2	7
643	27713104	100	60	84.2105	16	25	19	100	100	93.75	0	90	77.7778	66.6667	66.6667	100	92.8571	11	5	16	9	10	9	9	12	4	14
644	27861762	0	97.2973	28.5714	20	37	28	0	0	100	95	57.1429	0	0	30	0	30.7692	9	11	17	20	14	14	16	10	12	13
644	27861763	0	100	25	3	2	4	0	NA	100	100	33.3333	0	0	0	0	66.6667	3	NA	1	1	3	1	2	2	1	3
645	27887780	75	0	70.3704	24	30	27	93.3333	44.4444	0	0	36.3636	93.75	0	40	50	40	15	9	14	16	11	16	7	15	12	15
645	27887781	78.9474	0	62.1622	19	29	37	88.2353	0	0	0	38.8889	84.2105	14.2857	37.5	27.2727	64.7059	17	2	15	14	18	19	14	16	11	17
646	27895427	87.5	0	50	8	10	6	100	0	0	0	25	100	0	42.8571	25	28.5714	7	1	7	3	4	2	3	7	4	7
646	27895428	80	0	59.2593	20	14	27	100	33.3333	0	0	33.3333	91.6667	0	64.7059	44.4444	33.3333	14	6	7	7	15	12	11	17	9	15
647	27909255	40	91.1765	76.9231	15	34	39	30.7692	100	93.75	88.8889	88.2353	68.1818	0	43.75	16.6667	36.3636	13	2	16	18	17	22	16	16	6	22
647	27909256	34.1463	87.1429	64.7059	41	70	68	19.3548	80	88.5714	85.7143	63.6364	65.7143	48	52.9412	50	36.5854	31	10	35	35	33	35	25	34	26	41
648	27936960	46.1538	94.7368	94.1176	26	19	17	37.5	60	90.9091	100	100	88.8889	100	81.8182	100	85.7143	16	10	11	8	8	9	8	11	4	14
648	27936961	28.5714	100	83.3333	7	12	6	28.5714	NA	100	100	100	75	100	85.7143	100	33.3333	7	NA	5	7	2	4	5	7	3	3
649	27940475	0	88.6364	25	36	44	40	0	0	85	91.6667	66.6667	0	61.1111	0	33.3333	26.6667	31	5	20	24	15	25	18	14	15	30
649	27940476	0	100	20.5882	18	18	34	0	0	100	100	50	0	44.4444	0	42.8571	41.6667	14	4	7	11	14	20	9	6	7	12
650	27942664	0	90.625	38.0952	18	32	21	0	0	84.6154	94.7368	66.6667	0	76.9231	0	35.2941	44.4444	14	4	13	19	12	9	13	9	17	9
650	27942665	0	91.6667	8.69565	19	24	23	0	0	100	84.6154	28.5714	0	56.25	0	16.6667	33.3333	14	5	11	13	7	16	16	13	6	15
651	27978478	47.619	94.8718	78.9474	21	39	38	0	100	95.2381	94.4444	90	66.6667	94.7368	100	90	100	11	10	21	18	20	18	19	16	10	16
651	27978479	31.5789	100	52	19	18	25	0	100	100	100	100	14.2857	100	88.8889	66.6667	85.7143	13	6	11	7	11	14	12	9	3	14
652	28003535	0	46.1538	36.8421	11	13	19	0	0	100	0	36.3636	37.5	20	83.3333	0	0	9	2	6	7	11	8	5	6	2	6
652	28003536	8.33333	50	33.3333	12	8	12	0	50	100	0	33.3333	33.3333	62.5	62.5	0	0	10	2	4	4	6	6	8	8	5	7
653	28017580	88.8889	0	53.3333	9	11	15	100	50	0	0	60	50	60	0	50	0	7	2	8	3	5	10	5	4	4	2
653	28017581	90.9091	0	59.0909	22	12	22	93.75	83.3333	0	0	58.3333	60	36.3636	92	28.5714	14.2857	16	6	6	6	12	10	11	25	7	7
654	28081246	46.6667	88	52.9412	15	25	17	50	33.3333	77.7778	93.75	77.7778	25	0	8.33333	0	25	12	3	9	16	9	8	9	12	6	8
654	28081247	52.9412	95.4545	75.8621	17	22	29	42.8571	100	87.5	100	93.75	53.8462	21.4286	58.8235	0	16.6667	14	3	8	14	16	13	14	17	11	12
655	28307940	0	41.6667	40	9	12	20	0	0	0	83.3333	28.5714	46.1538	80	40	40	80	7	2	6	6	7	13	5	15	5	10
655	28307941	8	58.6207	36.3636	25	29	33	0	33.3333	10	84.2105	33.3333	38.8889	54.5455	27.2727	40	85.7143	19	6	10	19	15	18	11	11	10	14
656	28339571	95.3488	44.4444	93.1034	43	45	58	94.1176	100	94.4444	11.1111	88.8889	96.7742	96.1538	91.4286	100	100	34	9	18	27	27	31	26	35	16	26
656	28339572	95.8904	47.2527	95.7447	73	91	94	96.6667	92.3077	95.5556	0	94.7368	96.4286	95.2381	95.8333	92.8571	88.7097	60	13	45	46	38	56	42	48	42	62
657	28559980	100	25	61.5385	2	8	13	100	100	100	0	85.7143	33.3333	71.4286	50	0	11.1111	1	1	2	6	7	6	7	2	1	9
657	28559981	94.7368	44	70.5882	19	25	17	92.8571	100	100	0	100	44.4444	50	18.1818	0	0	14	5	11	14	8	9	10	11	6	11
658	28570005	96.2963	50	93.75	27	18	16	100	90.9091	75	0	92.8571	100	50	25	0	0	16	11	12	6	14	2	8	8	3	7
658	28570006	100	37.5	73.3333	11	16	15	100	100	100	0	100	33.3333	57.1429	100	0	0	6	5	6	10	9	6	7	2	4	3
659	28585636	100	43.75	69.2308	13	16	26	100	100	100	0	91.6667	50	100	37.5	0	0	10	3	7	9	12	14	10	8	9	5
659	28585637	100	46.1538	78.5714	17	13	14	100	100	75	0	100	50	75	50	0	0	13	4	8	5	8	6	4	4	3	8
660	28589454	100	21.0526	66.6667	14	19	18	100	100	66.6667	0	100	40	83.3333	40	25	12.5	11	3	6	13	8	10	6	10	4	8
660	28589455	100	16.6667	77.7778	9	6	9	100	100	50	0	100	33.3333	100	66.6667	0	0	4	5	2	4	6	3	2	3	6	5
661	28607531	93.3333	43.6364	77.0833	45	55	48	94.7368	85.7143	96	0	96.1538	54.5455	96.875	44.1176	6.66667	0	38	7	25	30	26	22	32	34	15	33
661	28607532	92.4528	49.4253	71.4286	53	87	91	95.6522	71.4286	97.6744	2.27273	91.1111	52.1739	97.7273	30.5556	0	0	46	7	43	44	45	46	44	36	31	42
662	28845584	0	90	35	9	10	20	0	NA	100	83.3333	0	100	50	100	100	100	9	NA	4	6	13	7	6	8	3	6
662	28845585	20.8333	91.4286	45.9459	24	35	37	11.1111	50	88.8889	94.1176	0	94.4444	60	100	100	82.3529	18	6	18	17	19	18	15	17	13	17
663	29139397	10.7143	55.1724	20.6897	28	29	29	0	50	0	100	37.5	0	26.6667	76.9231	0	0	22	6	13	16	16	13	15	13	5	17
663	29139398	14.2857	60	30.303	21	30	33	0	50	0	100	71.4286	0	28.5714	73.6842	0	0	15	6	12	18	14	19	21	19	8	13
664	29227937	44	98.0769	69.3548	50	52	62	48.2759	38.0952	96.6667	100	96.4286	47.0588	87.0968	93.5484	0	84.375	29	21	30	22	28	34	31	31	16	32
664	29227938	47.3684	100	81.8182	19	15	22	43.75	66.6667	100	100	92.8571	62.5	81.8182	80	20	100	16	3	6	9	14	8	11	5	5	11
665	29314400	94.382	42.9825	67.5497	89	114	151	94.5205	93.75	100	1.51515	95.8904	41.0256	90.4762	95.5882	93.0233	0	73	16	48	66	73	78	63	68	43	79
665	29314401	96.2963	46.875	76.0563	81	128	142	95.3846	100	96.7742	0	100	55.8442	100	95.2381	97.9592	1.49254	65	16	62	66	65	77	69	63	49	67
666	29315878	91.8919	43.9024	81.25	37	41	32	89.6552	100	89.4737	4.54545	100	57.1429	78.2609	86.6667	70.5882	5.88235	29	8	19	22	18	14	23	30	17	17
666	29315879	92	41.6667	63.0769	25	48	65	94.4444	85.7143	83.3333	0	100	33.3333	92.3077	88.8889	91.6667	4.7619	18	7	24	24	29	36	26	27	12	21
667	29337127	87.5	0	79.1667	24	15	24	66.6667	100	0	0	100	61.5385	0	100	16.6667	0	9	15	5	10	11	13	18	8	6	7
667	29337128	87.5	3.57143	73.6842	24	28	38	70	100	0	6.25	95	50	4.34783	100	37.5	0	10	14	12	16	20	18	23	22	8	20
668	29393196	94.1176	47.3684	79.0698	17	38	43	91.6667	100	100	45.9459	80	77.7778	89.2857	100	86.6667	75	12	5	1	37	25	18	28	15	15	4
668	29393197	100	50	88.8889	4	2	9	100	NA	0	100	100	66.6667	100	75	100	100	4	NA	1	1	6	3	5	4	3	4
669	29408728	50	96.2963	62.963	20	27	27	55.5556	0	91.6667	100	92.3077	35.7143	100	63.6364	100	100	18	2	12	15	13	14	11	11	4	8
669	29408729	25	87.5	62.5	4	8	8	33.3333	0	80	100	100	25	100	25	100	100	3	1	5	3	4	4	5	4	5	9
670	29426887	96.7391	2.7027	95.3947	92	74	152	97.4026	93.3333	100	1.36986	90	100	91.1765	89.2857	91.8919	91.5493	77	15	1	73	70	82	68	56	37	71
670	29426888	94.8454	44	92.3077	97	125	104	96.6667	91.8919	98.1818	1.42857	93.1818	91.6667	86.6667	94.4444	88.8889	88.2353	60	37	55	70	44	60	45	54	36	51
671	29596102	20.5128	91.8919	59.5238	39	37	42	0	38.0952	95.6522	85.7143	73.913	42.1053	60	33.3333	29.4118	40	18	21	23	14	23	19	15	21	17	20
671	29596103	11.5385	66.6667	51.3514	26	24	37	0	37.5	81.8182	53.8462	76.4706	30	50	53.3333	25	20	18	8	11	13	17	20	16	15	8	15
672	29638641	4.63918	45.4183	32.6531	194	251	245	0	31.0345	40.1575	50.8065	45.2381	19.3277	17.0732	38.2716	0	72.2222	165	29	127	124	126	119	123	81	77	90
672	29638642	5.76923	46.1538	38.3721	52	104	86	2.22222	28.5714	53.8462	38.4615	61.5385	19.1489	23.7288	31.1111	0	69.697	45	7	52	52	39	47	59	45	24	33
673	29641335	50	100	85.7143	2	4	7	0	100	100	100	100	75	NA	100	NA	50	1	1	3	1	3	4	NA	1	NA	2
673	29641336	16.6667	94.6429	88.3721	30	56	43	0	50	92.5926	96.5517	93.1034	78.5714	81.4815	50	0	14.7059	20	10	27	29	29	14	27	22	8	34
674	29648954	4.54545	93.1034	74.1935	22	29	31	0	100	92.8571	93.3333	88.2353	57.1429	100	41.1765	0	0	21	1	14	15	17	14	13	17	11	18
674	29648955	10.5263	90.4762	68	19	21	25	0	100	87.5	92.3077	100	38.4615	88.8889	54.5455	0	0	17	2	8	13	12	13	18	11	10	11
675	30711375	52.381	93.4426	55.3191	42	61	47	36.6667	91.6667	93.5484	93.3333	80	37.037	40.7407	38.4615	66.6667	53.8462	30	12	31	30	20	27	27	26	9	26
675	30711376	45.4545	100	57.1429	11	7	7	40	100	100	100	33.3333	75	16.6667	0	50	75	10	1	4	3	3	4	6	1	2	4
676	30803299	86.6667	31.8182	86.3636	15	22	22	100	50	0	100	81.8182	90.9091	54.5455	88.8889	83.3333	63.6364	11	4	15	7	11	11	11	9	6	11
676	30803300	92.8571	36.3636	89.4737	14	11	19	90	100	0	80	83.3333	92.3077	50	100	90	75	10	4	6	5	6	13	4	10	10	8
677	30996795	90	46.1538	77.7778	10	13	9	87.5	100	0	100	83.3333	66.6667	25	25	0	71.4286	8	2	7	6	6	3	4	4	2	7
677	30996796	100	40.9091	88.4615	17	22	26	100	100	0	90	87.5	90	0	71.4286	71.4286	100	12	5	12	10	16	10	7	7	7	11
678	31047772	52	94.2857	66.2162	50	70	74	56.7568	38.4615	94.2857	94.2857	93.5484	46.5116	83.3333	44.8276	94.4444	96.6667	37	13	35	35	31	43	24	29	18	30
678	31047773	54.1667	100	72.7273	24	38	33	52.6316	60	100	100	100	43.75	100	50	81.8182	81.8182	19	5	22	16	17	16	15	18	11	22
679	31054607	95.8333	44.8276	94.2857	24	29	35	94.1176	100	0	86.6667	90.9091	100	45.4545	100	100	0	17	7	14	15	22	13	22	21	8	22
679	31054608	100	45	95.2381	16	20	21	100	100	10	80	100	88.8889	54.5455	94.4444	91.6667	0	14	2	10	10	12	9	11	18	12	11
680	31317504	0	75	50	3	4	6	0	NA	NA	75	33.3333	66.6667	100	20	0	NA	3	NA	NA	4	3	3	1	5	3	NA
680	31317505	39.0244	89.1892	59.0909	41	37	22	0	59.2593	88.8889	89.4737	66.6667	53.8462	70	45.4545	50	100	14	27	18	19	9	13	10	11	10	11
681	31524685	21.0526	96.4286	58.3333	19	28	24	0	80	90.9091	100	30	78.5714	30	66.6667	36.3636	62.5	14	5	11	17	10	14	20	6	11	8
681	31524686	29.7297	89.2857	76.6667	37	28	30	0	84.6154	100	78.5714	58.3333	88.8889	11.1111	33.3333	37.5	84.2105	24	13	14	14	12	18	9	18	8	19
682	31532800	27.6596	93.2203	66.1017	47	59	59	0	100	93.5484	92.8571	52.9412	84	51.6129	26.087	29.4118	100	34	13	31	28	34	25	31	23	17	34
682	31532801	14.2857	91.4286	85	14	35	20	0	100	90	93.3333	78.5714	100	53.8462	30	50	84.6154	12	2	20	15	14	6	13	10	6	13
683	31541400	18.75	94.2857	69.2308	16	35	26	0	100	89.4737	100	46.1538	92.3077	0	0	33.3333	63.6364	13	3	19	16	13	13	12	8	9	11
683	31541401	11.1111	81.8182	76.4706	9	11	17	0	100	83.3333	80	57.1429	90	5.26316	0	22.2222	50	8	1	6	5	7	10	19	6	9	8
684	31551332	28.5714	100	71.4286	7	6	7	0	100	100	100	50	80	33.3333	100	100	66.6667	5	2	4	2	2	5	3	3	1	6
684	31551333	53.8462	100	76.4706	13	16	17	0	100	100	100	66.6667	87.5	42.8571	33.3333	50	80	6	7	12	4	9	8	7	6	4	10
685	31715294	100	21.4286	92.8571	9	14	14	100	100	100	0	100	87.5	100	100	100	100	7	2	3	11	6	8	5	5	4	5
685	31715295	100	30.7692	95	14	13	20	100	100	100	0	100	91.6667	100	100	100	100	9	5	4	9	8	12	8	9	6	5
686	31831065	52.9412	93.1034	76	17	29	25	56.25	0	100	87.5	80	73.3333	90	63.6364	28.5714	60	16	1	13	16	10	15	10	11	7	10
686	31831080	0	66.6667	57.1429	3	12	7	0	0	66.6667	66.6667	75	33.3333	100	14.2857	0	40	2	1	6	6	4	3	1	7	5	5
687	32360110	53.8462	7.69231	18.1818	13	13	11	55.5556	50	0	12.5	50	11.1111	50	0	0	0	9	4	5	8	2	9	10	1	2	4
687	32360111	63.6364	22.2222	26.6667	11	27	15	77.7778	0	11.1111	44.4444	33.3333	22.2222	44.4444	0	0	25	9	2	18	9	6	9	9	5	5	8
688	33765862	36.9565	88.5714	67.3913	46	35	46	59.0909	16.6667	88.2353	88.8889	70	65.3846	44	70.5882	53.3333	65	22	24	17	18	20	26	25	17	15	20
688	33765863	40	80	70	10	10	10	66.6667	28.5714	60	100	75	66.6667	42.8571	100	33.3333	71.4286	3	7	5	5	4	6	7	6	3	7
689	34224419	75	0	9.375	24	27	32	75	75	0	0	18.75	0	93.75	81.8182	66.6667	6.25	20	4	11	16	16	16	16	11	9	16
689	34224420	92.3077	0	27.2727	13	20	22	90.9091	100	0	0	75	0	55.5556	85.7143	60	0	11	2	8	12	8	14	9	7	5	9
690	34317437	80.9524	40.9091	53.3333	21	22	30	80	83.3333	80	8.33333	81.8182	36.8421	77.7778	87.5	57.1429	80	15	6	10	12	11	19	18	24	7	10
690	34317438	100	45	52.381	10	20	21	100	100	90	0	90.9091	10	50	91.6667	80	71.4286	7	3	10	10	11	10	8	12	5	7
691	34341458	64.2857	11.1111	39.1304	14	9	23	61.5385	100	33.3333	0	28.5714	55.5556	25	41.6667	100	66.6667	13	1	3	6	14	9	8	12	2	6
691	34341459	80	38.8889	63.6364	20	18	22	75	83.3333	50	25	66.6667	60	50	33.3333	0	50	8	12	10	8	12	10	4	15	4	6
692	34378373	93.3333	23.5294	73.3333	15	17	15	92.3077	100	66.6667	0	100	33.3333	81.8182	84.6154	83.3333	70	13	2	6	11	9	6	11	13	6	10
692	34378374	95.6522	34.7826	70	23	23	20	93.3333	100	66.6667	0	84.6154	42.8571	100	66.6667	100	76.9231	15	8	12	11	13	7	13	12	10	13
693	34489984	0	45.4545	22.2222	9	22	18	0	0	50	44.4444	33.3333	11.1111	0	33.3333	14.2857	42.8571	6	3	4	18	9	9	3	6	7	7
693	34489989	14.2857	60.8696	33.3333	21	23	21	15.7895	0	25	68.4211	22.2222	41.6667	40	40	0	42.8571	19	2	4	19	9	12	5	5	5	7
694	34625446	88.8889	48.1481	73.6842	18	27	19	75	100	25	66.6667	57.1429	83.3333	69.2308	80	100	72.7273	8	10	12	15	7	12	13	10	5	11
694	34625447	100	50	57.1429	3	10	7	100	100	0	55.5556	0	80	66.6667	66.6667	100	50	2	1	1	9	2	5	3	3	2	2
695	34742623	87.5	41.6667	77.4194	24	36	31	84.2105	100	100	16	81.8182	75	89.2857	100	100	80	19	5	11	25	11	20	28	12	10	10
695	34742624	92.8571	35	58	42	60	50	95.8333	88.8889	66.6667	24.4444	76.4706	48.4848	90.4762	72.2222	62.5	73.3333	24	18	15	45	17	33	21	18	8	15
696	34944199	80	31.5789	41.1765	20	19	17	70	90	18.1818	50	50	38.4615	25	66.6667	66.6667	33.3333	10	10	11	8	4	13	8	6	12	3
696	34944200	80	31.25	66.6667	5	16	6	75	100	37.5	25	80	0	40	60	0	66.6667	4	1	8	8	5	1	5	10	2	3
697	35018852	25	90.9091	66.6667	12	11	9	37.5	0	100	83.3333	66.6667	66.6667	33.3333	40	100	0	8	4	5	6	6	3	3	5	2	2
697	35018853	10	50	40	10	22	15	0	12.5	61.5385	33.3333	57.1429	25	40	66.6667	50	40	2	8	13	9	7	8	5	9	6	5
698	46498086	23.0769	75	63.6364	13	12	11	25	20	71.4286	80	66.6667	60	60	100	75	100	8	5	7	5	6	5	5	4	4	4
698	46498087	37.5	88.8889	66.6667	8	9	9	28.5714	100	100	75	50	80	100	100	NA	66.6667	7	1	5	4	4	5	3	1	NA	3
699	46535314	83.3333	40	76.7442	54	30	43	69.2308	96.4286	50	31.25	75	78.2609	76.9231	84.6154	50	68.75	26	28	14	16	20	23	26	26	8	16
699	46535323	83.3333	37.5	80	6	8	5	66.6667	100	0	42.8571	75	100	100	100	100	0	3	3	1	7	4	1	1	2	2	4
700	46930665	96.875	52	60	32	25	25	95.8333	100	86.6667	0	93.75	0	66.6667	44.4444	50	61.1111	24	8	15	10	16	9	12	18	6	18
700	46930666	100	44.4444	50	9	18	12	100	100	100	0	100	0	54.5455	25	0	40	7	2	8	10	6	6	11	8	3	5
701	46953161	95	46.4286	94.7368	20	28	38	92.8571	100	0	76.4706	100	88.8889	23.0769	46.1538	11.1111	53.8462	14	6	11	17	20	18	13	13	9	13
701	46953162	100	38.8889	72.2222	12	18	18	100	100	0	100	76.9231	60	25	14.2857	25	45.4545	8	4	11	7	13	5	12	7	4	11
702	47941105	36.3636	91.3043	57.5758	22	23	33	35.7143	37.5	92.8571	88.8889	93.75	23.5294	35.7143	42.8571	25	0	14	8	14	9	16	17	14	14	4	13
702	47941106	57.5758	97.9592	65.3846	33	49	52	51.7241	100	95.8333	100	91.6667	42.8571	38.8889	46.4286	27.2727	7.40741	29	4	24	25	24	28	18	28	22	27
703	47982405	100	0	23.0769	12	19	13	100	100	0	0	0	60	83.3333	20	42.8571	0	10	2	8	11	8	5	6	5	7	3
703	47982406	71.7949	0	22.8571	39	23	35	86.3636	52.9412	0	0	5.55556	41.1765	75	57.1429	64.2857	0	22	17	13	10	18	17	24	21	14	17
704	48064467	100	43.4783	67.5676	14	23	37	100	100	90	7.69231	93.3333	50	66.6667	100	100	100	12	2	10	13	15	22	12	13	6	11
704	48064468	100	52.381	80	39	42	60	100	100	95.4545	5	100	55.5556	59.375	97.1429	100	89.4737	33	6	22	20	33	27	32	35	17	38
705	48116976	96	47.8261	93.75	25	23	32	100	90.9091	100	0	94.4444	92.8571	26.6667	100	100	100	14	11	11	12	18	14	15	14	8	14
705	48116977	100	50	81.8182	9	12	11	100	100	100	0	87.5	66.6667	50	100	100	0	5	4	6	6	8	3	2	4	6	1
706	48754491	45.4545	0	39.1304	11	20	23	44.4444	50	0	0	23.0769	60	10	12.5	0	0	9	2	7	13	13	10	10	8	10	10
706	48754492	53.3333	11.1111	50	15	27	26	53.8462	50	17.6471	0	40	56.25	14.2857	6.25	50	0	13	2	17	10	10	16	21	16	8	16
707	48775242	100	40	81.25	4	5	16	100	NA	100	25	66.6667	100	90	80	80	0	4	NA	1	4	9	7	10	5	5	2
707	48775243	97.9167	48.7805	75.6757	48	41	37	96.5517	100	95.2381	0	43.75	100	88.2353	60	100	0	29	19	21	20	16	21	17	15	12	24
708	48827843	100	48.4848	77.7778	22	33	36	100	100	100	0	52.9412	100	77.7778	62.5	85.7143	0	16	6	16	17	17	19	18	8	14	19
708	48827844	100	50	88.2353	19	20	17	100	100	100	0	71.4286	100	66.6667	28.5714	66.6667	0	10	9	10	10	7	10	6	7	3	5
709	49014233	25	100	66.6667	4	7	6	25	NA	100	100	66.6667	66.6667	20	54.5455	100	33.3333	4	NA	4	3	3	3	5	11	1	3
709	49014234	45.4545	90.4762	72.4138	22	21	29	33.3333	60	88.8889	91.6667	86.3636	28.5714	33.3333	50	76.9231	14.2857	12	10	9	12	22	7	15	18	13	14
710	49128257	70.5882	0	22.2222	17	14	18	64.2857	100	0	0	0	44.4444	0	81.8182	0	26.6667	14	3	7	7	9	9	9	11	4	15
710	49128258	73.6842	9.09091	20.8333	19	11	24	63.6364	87.5	14.2857	0	0	33.3333	25	68.4211	25	37.5	11	8	7	4	9	15	8	19	4	8
711	49136674	90.4762	0	16	21	19	25	94.7368	50	0	0	0	33.3333	44.4444	90.9091	42.8571	45.4545	19	2	10	9	13	12	9	11	7	11
711	49136675	82.3529	0	24.1379	17	26	29	80	100	0	0	0	46.6667	61.5385	93.75	40	50	15	2	13	13	14	15	13	16	5	8
712	49149190	54.5455	4.34783	23.5294	22	23	34	50	62.5	0	5.88235	22.2222	25	12.5	33.3333	55.5556	23.0769	14	8	6	17	18	16	16	12	9	13
712	49149191	62.5	0	41.6667	8	9	12	83.3333	0	0	0	50	25	14.2857	25	57.1429	0	6	2	4	5	8	4	7	4	7	6
713	49150932	43.75	87.5	76.9231	16	24	26	42.8571	50	86.6667	88.8889	70	81.25	80	50	71.4286	55.5556	14	2	15	9	10	16	5	4	7	9
713	49150933	55.5556	95.8333	78.2609	18	24	23	69.2308	20	93.3333	100	71.4286	88.8889	42.8571	45.4545	62.5	55.5556	13	5	15	9	14	9	7	11	8	9
714	49152239	81.8182	0	35.2941	22	36	34	81.25	83.3333	0	0	57.1429	20	4.7619	66.6667	33.3333	45	16	6	15	21	14	20	21	15	6	20
714	49152240	65.2174	0	40	23	29	30	64.7059	66.6667	0	0	33.3333	46.6667	0	56.5217	42.8571	23.0769	17	6	14	15	15	15	13	23	7	13
715	49165450	61.9048	4	36.3636	21	25	22	61.5385	62.5	0	5	45.4545	27.2727	25	47.0588	40	25	13	8	5	20	11	11	12	17	10	12
715	49165451	61.2903	2.17391	38.2979	31	46	47	50	81.8182	6.25	0	47.619	30.7692	13.3333	61.5385	20	37.5	20	11	16	30	21	26	30	26	10	24
716	49360358	65.7895	0	61.5385	38	32	26	94.1176	42.8571	0	0	57.1429	66.6667	36.3636	27.2727	36.3636	0	17	21	18	14	14	12	11	11	11	11
716	49360359	80	0	63.6364	5	6	11	100	0	0	0	71.4286	50	0	0	28.5714	0	4	1	3	3	7	4	5	3	7	6
717	49361181	60	0	33.3333	10	12	15	62.5	50	0	0	25	42.8571	28.5714	42.8571	0	0	8	2	7	5	8	7	7	7	1	6
717	49361182	87.5	0	39.3443	48	52	61	94.5946	63.6364	0	0	46.875	31.0345	14.8148	47.8261	33.3333	0	37	11	24	28	32	29	27	23	15	24
718	49364144	61.1111	0	51.4286	18	30	35	100	22.2222	0	0	50	52.9412	71.4286	93.3333	33.3333	16.6667	9	9	14	16	18	17	14	15	9	12
718	49364145	75	0	55.5556	8	6	9	100	33.3333	0	0	75	40	66.6667	100	0	25	5	3	2	4	4	5	6	1	4	4
719	49370942	37.5	100	69.5652	16	21	23	36.3636	40	100	100	100	30	54.5455	46.1538	100	0	11	5	9	12	13	10	11	13	9	19
719	49370943	48.3871	92	57.5	31	25	40	37.5	60	100	88.2353	78.2609	29.4118	53.3333	31.25	84.6154	0	16	15	8	17	23	17	15	16	13	18
720	49387436	100	40	50	2	5	2	100	NA	66.6667	0	0	100	50	100	NA	0	2	NA	3	2	1	1	4	1	NA	2
720	49387437	88.8889	37.5	67.6471	27	40	34	86.3636	100	34.6154	42.8571	65	71.4286	43.4783	71.4286	70	54.5455	22	5	26	14	20	14	23	14	10	11
721	49425814	80.9524	38.0952	62.5	21	21	24	77.7778	100	0	80	90	42.8571	78.5714	90	25	82.3529	18	3	11	10	10	14	14	10	4	17
721	49425815	93.8776	48.6842	72.2222	49	76	72	91.4286	100	5.71429	85.3659	90	50	78.9474	65.7143	30	67.8571	35	14	35	41	40	32	38	35	20	28
722	49526935	100	31.25	95.4545	7	16	22	100	NA	100	0	100	93.3333	100	100	33.3333	90	7	NA	5	11	7	15	6	11	6	10
722	49526936	93.75	39.2857	91.6667	16	28	36	93.75	NA	91.6667	0	90	93.75	84.6154	93.75	36.3636	100	16	NA	12	16	20	16	13	16	11	13
723	49540070	100	20	85.7143	2	5	7	100	NA	100	0	100	75	100	100	NA	100	2	NA	1	4	3	4	3	2	NA	3
723	49540093	97.2973	44.8276	95.122	37	29	41	94.1176	100	92.8571	0	93.75	96	94.7368	54.5455	70	100	17	20	14	15	16	25	19	11	10	17
724	49543179	33.3333	100	50	6	7	12	33.3333	NA	100	NA	50	50	25	33.3333	100	100	6	NA	7	NA	8	4	4	3	5	4
724	49543180	34.7826	89.6552	74.0741	23	29	27	53.3333	0	83.3333	94.1176	75	73.6842	57.1429	45.4545	81.8182	93.3333	15	8	12	17	8	19	14	11	11	15
725	49543550	92.3077	42.8571	76.9231	13	21	26	92.3077	NA	90	0	77.7778	76.4706	27.2727	85.7143	50	83.3333	13	NA	10	11	9	17	11	14	2	12
725	49543551	88.2353	38.4615	66.6667	17	26	18	83.3333	100	76.9231	0	66.6667	66.6667	39.1304	75	40	90	12	5	13	13	12	6	23	12	15	10
726	49604428	0	100	66.6667	1	2	6	NA	0	100	100	100	50	100	100	NA	NA	NA	1	1	1	2	4	2	1	NA	NA
726	49604429	44	94.1176	70	25	34	30	100	0	93.75	94.4444	86.6667	53.3333	60	100	50	100	11	14	16	18	15	15	20	13	4	14
727	49619863	51.2821	100	93.4783	39	38	46	37.931	90	100	100	96.1538	90	84.6154	57.8947	100	95.2381	29	10	20	18	26	20	13	19	7	21
727	49619864	52.1739	95.6522	92	23	23	25	47.3684	75	91.6667	100	84.6154	100	92.8571	63.1579	100	94.4444	19	4	12	11	13	12	14	19	4	18
728	49639814	57.1429	97.1429	91.3043	28	35	23	38.8889	90	100	94.4444	91.6667	90.9091	84.6154	83.3333	85.7143	62.5	18	10	17	18	12	11	13	12	14	16
728	49639815	53.8462	94.4444	86.3636	13	18	22	53.8462	NA	100	90.9091	100	75	66.6667	100	100	76.9231	13	NA	7	11	10	12	6	6	8	13
729	49645014	0	100	69.2308	13	4	13	0	0	100	100	85.7143	50	85.7143	50	66.6667	100	6	7	2	2	7	6	7	2	3	2
729	49645015	0	100	72.2222	15	29	18	0	0	100	100	100	37.5	100	21.4286	66.6667	91.6667	11	4	13	16	10	8	10	14	6	12
730	49724869	100	54.0541	91.3043	37	37	46	100	100	100	0	91.3043	91.3043	85.7143	53.8462	100	50	29	8	20	17	23	23	14	26	15	24
730	49724870	100	45	96.9697	20	20	33	100	100	100	0	100	95	92.8571	33.3333	100	60	18	2	9	11	13	20	14	6	7	10
731	49726891	97.2973	32.5	88	37	40	50	96.4286	100	72.2222	0	90	86.6667	65	55.5556	80	33.3333	28	9	18	22	20	30	20	18	15	21
731	49726892	100	47.619	89.4737	12	21	19	100	100	90	9.09091	100	84.6154	75	12.5	0	28.5714	10	2	10	11	6	13	8	8	3	7
732	49767921	12.5	100	43.75	16	19	16	0	50	100	100	77.7778	0	83.3333	40	0	0	12	4	8	11	9	7	12	15	6	11
732	49767922	9.09091	88	20.9302	33	50	43	0	37.5	92.8571	81.8182	47.3684	0	76.9231	33.3333	35.7143	0	25	8	28	22	19	24	26	27	14	27
733	49779937	0	58.3333	12.5	6	12	8	0	NA	0	70	0	25	50	75	42.8571	75	6	NA	2	10	4	4	10	4	7	8
733	49779938	21.875	76	52.1739	32	25	23	0	63.6364	0	100	64.7059	16.6667	41.6667	64.2857	46.6667	33.3333	21	11	6	19	17	6	12	14	15	12
734	49821933	100	14.2857	76.4706	6	14	17	100	100	0	100	66.6667	81.8182	0	100	50	100	5	1	12	2	6	11	3	6	2	5
734	49821934	94.1176	52.1739	90	17	23	20	87.5	100	9.09091	91.6667	83.3333	92.8571	28.5714	91.6667	42.8571	100	8	9	11	12	6	14	14	12	7	9
735	49863503	44.4444	100	70.8333	18	22	24	50	33.3333	100	100	100	0	33.3333	90	27.2727	54.5455	12	6	10	12	17	7	3	10	11	11
735	49863504	29.0323	89.1304	45.2381	31	46	42	35	18.1818	88.8889	89.2857	86.3636	0	50	88.2353	55.5556	53.3333	20	11	18	28	22	20	18	17	18	30
736	49874704	57.1429	100	66.6667	7	10	6	60	50	100	100	100	0	33.3333	100	100	20	5	2	7	3	4	2	6	2	4	5
736	49874705	50	100	56.6667	28	39	30	50	50	100	100	94.4444	0	56.25	94.1176	50	54.5455	22	6	17	22	18	12	16	17	12	11
737	49886021	47.0588	100	95.2381	17	16	21	33.3333	80	100	100	90.9091	100	75	88.8889	80	100	12	5	5	11	11	10	8	9	5	10
737	49886022	55.5556	100	94.1176	18	13	17	33.3333	100	100	100	88.8889	100	100	31.25	100	100	12	6	5	8	9	8	9	16	3	6
738	49934674	61.1111	0	21.7391	18	27	23	56.25	100	0	0	41.6667	0	50	100	70	71.4286	16	2	14	13	12	11	18	12	10	14
738	49934675	56.25	0	19.4444	16	31	36	46.1538	100	0	0	46.6667	0	33.3333	85.7143	55.5556	46.6667	13	3	17	14	15	21	15	14	9	15
739	50371610	77.4194	0	34.0909	31	33	44	61.1111	100	0	0	37.037	29.4118	30	0	64.2857	85	18	13	13	20	27	17	20	17	14	20
739	50371611	61.5385	12.5	43.4783	13	16	23	28.5714	100	11.1111	14.2857	60	12.5	54.5455	0	50	88.8889	7	6	9	7	15	8	11	5	8	9
740	50413231	16.6667	97.3684	71.0526	12	38	38	0	40	100	95.6522	52.381	94.1176	88.8889	61.5385	92.8571	0	7	5	15	23	21	17	18	13	14	7
740	50413232	5.88235	100	76.4706	17	23	34	0	50	100	100	46.6667	100	100	50	92.8571	9.09091	15	2	12	11	15	19	9	14	14	11
741	50417177	66.6667	0	36	21	28	25	58.8235	100	0	0	75	0	0	41.6667	30	82.6087	17	4	12	16	12	13	15	12	10	23
741	50417178	56.5217	4	38.2353	23	25	34	52.9412	66.6667	0	9.09091	59.0909	0	0	40.9091	50	94.1176	17	6	14	11	22	12	24	22	10	17
742	50435536	50	93.5484	68.5714	24	31	35	55	25	100	90.9091	40	90	60	56.25	13.3333	86.6667	20	4	9	22	15	20	15	16	15	15
742	50435537	50	96.6667	71.1538	28	60	52	57.8947	33.3333	96.5517	96.7742	44	96.2963	41.1765	48.7805	0	93.1034	19	9	29	31	25	27	17	41	17	29
743	50436393	86.6667	0	70.9677	15	15	31	92.3077	50	0	0	73.3333	68.75	100	42.8571	70	64.7059	13	2	5	10	15	16	4	7	10	17
743	50436394	90	0	62.963	20	25	27	88.8889	90.9091	0	0	80	52.9412	62.5	11.1111	100	64.2857	9	11	17	8	10	17	8	9	3	14
744	50437575	40	91.3043	68.6275	30	46	51	30.7692	100	95.4545	87.5	44.8276	100	29.6296	40	0	86.9565	26	4	22	24	29	22	27	20	5	23
744	50437576	60	100	70.5882	30	21	34	60	60	100	100	40	94.7368	58.3333	35.7143	0	76.9231	20	10	4	17	15	19	12	14	8	13
745	50442144	48	94.4444	64.5161	25	36	31	45	60	91.3043	100	38.8889	100	0	41.6667	0	88.8889	20	5	23	13	18	13	24	12	8	27
745	50442145	47.3684	90	78.5714	19	20	14	50	33.3333	83.3333	100	50	100	28.5714	50	0	100	16	3	12	8	6	8	7	6	1	10
746	50443390	100	48.5714	96.4286	31	35	28	100	100	94.4444	0	83.3333	100	91.3043	100	92.8571	100	25	6	18	17	6	22	23	20	14	14
746	50443391	96.2963	42.8571	74.359	27	42	39	92.3077	100	100	0	47.3684	100	96	95.2381	100	100	13	14	18	24	19	20	25	21	14	17
747	50457635	9.09091	95.8333	83.3333	11	24	18	14.2857	0	90.9091	100	81.8182	85.7143	0	40	44.4444	0	7	4	11	13	11	7	19	15	9	15
747	50457636	46.875	100	94.7368	32	43	38	45.4545	50	100	100	100	88.2353	4	42.1053	55.5556	0	22	10	22	21	21	17	25	19	18	22
748	50569534	44.4444	100	93.9394	9	26	33	28.5714	100	100	100	92.8571	94.7368	58.8235	86.6667	75	90.4762	7	2	13	13	14	19	17	15	8	21
748	50569535	48.3871	97.5	88.6792	31	40	53	48	50	100	94.7368	92	85.7143	74.0741	96.2963	100	85	25	6	21	19	25	28	27	27	18	20
749	50722042	0	100	68.4211	19	12	19	0	0	100	100	57.1429	75	70	88.2353	0	100	16	3	5	7	7	12	10	17	3	11
749	50722043	0	96.4286	50	16	28	24	0	0	100	91.6667	61.5385	36.3636	66.6667	78.9474	63.6364	84	12	4	16	12	13	11	15	19	11	25
750	50739449	54.5455	100	88.2353	11	8	17	55.5556	50	100	100	87.5	88.8889	60	78.5714	100	55.5556	9	2	3	5	8	9	10	14	4	9
750	50739450	28.5714	94.1176	77.2727	21	17	22	25	40	90.9091	100	75	80	33.3333	88.8889	75	90.9091	16	5	11	6	12	10	12	18	8	11
751	50751786	54.7619	96.1538	74.0741	42	52	54	51.7241	61.5385	90.9091	100	96	55.1724	54.8387	70.8333	41.1765	100	29	13	22	30	25	29	31	24	17	21
751	50751787	57.1429	100	61.5385	21	24	26	64.2857	42.8571	100	100	100	37.5	55.5556	63.6364	33.3333	95	14	7	13	11	10	16	9	11	9	20
752	50842162	30	94.1176	57.8947	10	17	19	37.5	0	92.8571	100	87.5	36.3636	16.6667	45.4545	0	87.5	8	2	14	3	8	11	6	11	3	16
752	50842163	56.6667	100	83.3333	30	21	42	57.8947	54.5455	100	100	88	76.4706	41.1765	57.1429	0	82.7586	19	11	12	9	25	17	17	21	5	29
753	50898122	51.2195	91.6667	77.3585	41	36	53	47.0588	71.4286	94.4444	88.8889	80	75	66.6667	79.1667	86.6667	69.697	34	7	18	18	25	28	21	24	15	33
753	50898123	54.5455	95.6522	75	11	23	24	50	100	100	92.3077	78.5714	70	100	62.5	83.3333	80	10	1	10	13	14	10	7	8	6	10
754	50913463	100	0	33.3333	7	10	6	100	100	0	0	0	100	60	0	50	0	5	2	4	6	4	2	5	3	2	4
754	50913464	91.1765	0	32.4324	34	36	37	100	50	0	0	0	70.5882	46.6667	0	40	0	28	6	24	12	20	17	15	23	15	25
755	50918801	73.4694	0	18.75	49	57	64	93.9394	31.25	0	0	0	44.4444	43.3333	0	31.5789	0	33	16	35	22	37	27	30	28	19	26
755	50918942	80	0	40	20	5	10	88.8889	72.7273	0	0	0	57.1429	0	0	100	0	9	11	4	1	3	7	3	6	2	3
756	50940719	14.2857	68.75	24	21	16	25	0	100	100	50	36.3636	14.2857	16.6667	40	63.6364	55.5556	18	3	6	10	11	14	6	5	11	9
756	50940720	12.5	61.5385	50	8	13	10	14.2857	0	57.1429	66.6667	60	40	40	87.5	75	58.8235	7	1	7	6	5	5	5	8	8	17
757	50942034	17.2414	95.082	78.9474	29	61	57	4.54545	57.1429	93.1034	96.875	100	53.8462	50	90.3226	100	90.9091	22	7	29	32	31	26	22	31	21	22
757	50942035	8.69565	96.2264	64.1509	46	53	53	0	50	92	100	85.7143	40	36	96.1538	86.6667	81.8182	38	8	25	28	28	25	25	26	15	22
758	50950805	15.1515	96.9697	61.8182	33	66	55	0	83.3333	100	94.5946	90.3226	25	38.4615	93.5484	81.8182	72.7273	27	6	29	37	31	24	26	31	22	33
758	50950806	7.14286	96.875	70	14	32	20	0	100	94.7368	100	100	40	46.1538	100	100	92.8571	13	1	19	13	10	10	13	11	5	14
759	50953913	100	39.2857	76.6667	29	28	30	100	100	91.6667	0	54.5455	89.4737	33.3333	90	100	0	13	16	12	16	11	19	9	10	3	6
759	50953914	94.4444	43.4783	85.7143	18	23	21	91.6667	100	100	0	50	100	61.5385	100	83.3333	0	12	6	10	13	6	15	13	9	6	19
760	50964913	84.6154	36.1111	76.3158	26	36	38	86.3636	75	76.4706	0	84.2105	68.4211	30.303	73.6842	66.6667	0	22	4	17	19	19	19	33	19	12	17
760	50964914	80.5556	36.1111	69.7674	36	36	43	80.6452	80	81.25	0	80	64.2857	43.4783	75	64.7059	4.7619	31	5	16	20	15	28	23	12	17	21
761	50973122	37.5	87.5	51.5152	32	32	33	5	91.6667	83.3333	92.8571	76.4706	25	7.69231	63.1579	41.1765	42.8571	20	12	18	14	17	16	13	19	17	14
761	50973123	0	100	61.5385	12	15	13	0	NA	100	100	100	28.5714	33.3333	28.5714	50	33.3333	12	NA	11	4	6	7	6	7	4	6
762	50985422	33.3333	85.7143	82.1429	6	14	28	NA	33.3333	100	71.4286	81.25	83.3333	66.6667	53.8462	40	70	NA	6	7	7	16	12	6	13	5	10
762	50985423	20.8333	82.1429	71.4286	24	28	35	0	71.4286	78.5714	85.7143	70.5882	72.2222	75	37.5	28.5714	68.75	17	7	14	14	17	18	8	16	7	16
763	51050283	36.6667	85	67.4419	30	40	43	34.7826	42.8571	80	90	75	60.8696	28.5714	80	50	18.75	23	7	20	20	20	23	14	15	12	16
763	51050284	50	92.5	75.5102	30	40	49	45.4545	62.5	95	90	71.4286	78.5714	22.7273	87.5	8.33333	55	22	8	20	20	21	28	22	24	12	20
764	51073992	0	45	21.0526	37	40	38	0	0	94.7368	0	40	0	0	52.6316	66.6667	50	26	11	19	21	20	18	13	19	6	14
764	51073993	0	45.4545	13.3333	12	11	15	0	0	83.3333	0	25	0	14.2857	50	25	100	9	3	6	5	8	7	7	8	4	6
765	51163146	100	16.6667	80	4	6	10	100	100	50	0	100	0	60	50	0	0	3	1	2	4	8	2	5	4	1	2
765	51163147	72.2222	31.7073	42.8571	18	41	35	90	50	81.25	0	83.3333	0	41.6667	8.33333	63.6364	77.7778	10	8	16	25	18	17	12	12	11	9
766	51165149	93.1034	45.9459	60.5263	29	37	38	95.8333	80	94.4444	0	80	47.8261	56.25	96.6667	78.5714	88.8889	24	5	18	19	15	23	16	30	14	18
766	51165150	89.4737	47.619	68.1818	19	21	22	86.6667	100	90.9091	0	78.5714	50	81.8182	81.25	100	86.6667	15	4	11	10	14	8	11	16	7	15
767	51385044	66.6667	25	33.3333	6	8	6	66.6667	66.6667	33.3333	20	66.6667	0	50	66.6667	100	100	3	3	3	5	3	3	2	3	4	3
767	51385229	100	34.6154	66.6667	14	26	30	100	100	6.25	80	41.6667	83.3333	54.5455	77.7778	30	54.5455	9	5	16	10	12	18	11	9	10	11
768	51557622	0	55.2632	35.2941	21	38	34	0	0	0	72.4138	23.0769	42.8571	0	19.2308	0	0	14	7	9	29	13	21	13	26	6	17
768	51557623	0	52.381	20	12	21	15	0	0	0	68.75	16.6667	22.2222	0	12.5	0	0	8	4	5	16	6	9	4	8	5	10
769	51673370	27.7778	73.3333	48	18	15	25	45.4545	0	71.4286	75	36.3636	57.1429	30	53.3333	71.4286	50	11	7	7	8	11	14	10	15	7	6
769	51673371	33.3333	80	43.4783	15	15	23	25	42.8571	100	66.6667	45.4545	41.6667	33.3333	77.7778	75	62.5	8	7	6	9	11	12	9	9	4	8
770	51892130	50	94	62.963	46	50	54	33.3333	92.3077	92.5926	95.6522	88.8889	37.037	57.1429	90	47.619	76.6667	33	13	27	23	27	27	21	30	21	30
770	51892131	42.8571	88.2353	67.7419	21	34	31	42.8571	NA	85	92.8571	63.1579	75	80	95.8333	75	88.2353	21	NA	20	14	19	12	10	24	4	17
771	51926509	41.6667	85.7143	70.5882	24	28	17	56.25	12.5	93.3333	76.9231	100	16.6667	0	40	20	0	16	8	15	13	11	6	17	10	5	10
771	51926510	40	80	60	10	20	15	20	60	73.3333	100	88.8889	16.6667	0	0	33.3333	0	5	5	15	5	9	6	7	3	3	3
772	52211437	60	0	40.5405	20	26	37	57.1429	66.6667	0	0	93.3333	4.54545	0	0	0	66.6667	14	6	17	9	15	22	15	10	6	6
772	52211438	55.5556	0	41.1765	18	14	17	50	66.6667	0	0	87.5	0	16.6667	0	0	46.6667	12	6	7	7	8	9	6	5	13	15
773	52301177	100	60	71.4286	2	5	7	100	100	75	0	100	0	100	50	0	100	1	1	4	1	5	2	1	2	1	1
773	52301178	84.8485	44.3038	82.5	66	79	80	81.0811	89.6552	85.3659	0	78.5714	86.8421	43.75	42	32.2581	83.3333	37	29	41	38	42	38	48	50	31	42
774	52411255	53.8462	94.7368	66.6667	13	19	15	33.3333	100	100	90.9091	37.5	100	80	100	33.3333	90	9	4	8	11	8	7	5	6	3	10
774	52411256	44.4444	100	64.7059	9	8	17	16.6667	100	100	100	54.5455	83.3333	50	50	20	85.7143	6	3	4	4	11	6	4	2	5	7
775	52466683	91.3043	5	42.8571	23	20	21	100	77.7778	11.1111	0	60	0	23.0769	50	70.5882	76.4706	14	9	9	11	15	6	13	10	17	17
775	52466684	88.8889	0	7.69231	27	36	13	83.3333	93.3333	0	0	100	0	27.2727	45.4545	60	76.4706	12	15	19	17	1	12	11	11	5	17
776	52481939	100	0	18.75	21	11	16	100	100	0	0	37.5	0	50	33.3333	100	83.3333	10	11	6	5	8	8	6	3	3	6
776	52481940	93.75	0	3.84615	32	23	26	93.3333	94.1176	0	0	16.6667	0	42.8571	66.6667	100	90	15	17	13	10	6	20	14	9	9	10
777	52613036	68.8889	0	50.8475	90	62	59	64.4444	73.3333	0	0	93.75	0	46.4286	90.625	95	91.4286	45	45	26	36	32	27	28	32	20	35
777	52613037	66.6667	0	33.3333	9	23	15	66.6667	NA	0	0	83.3333	0	57.1429	0	100	100	9	NA	8	15	6	9	7	1	5	5
778	52790401	75	0	70	12	14	20	75	NA	0	0	77.7778	63.6364	38.4615	57.1429	100	0	12	NA	8	6	9	11	13	7	4	6
778	52790402	46.875	0	25	32	21	36	100	0	0	0	20	31.25	25	28.5714	75	0	15	17	10	11	20	16	8	7	4	10
779	52823983	97.0588	41.3793	45.4545	34	29	33	93.75	100	100	5.55556	38.8889	53.3333	68.75	54.5455	50	0	16	18	11	18	18	15	16	11	2	11
779	52823984	100	35.7143	53.3333	10	14	15	100	100	83.3333	0	66.6667	44.4444	83.3333	33.3333	33.3333	0	8	2	6	8	6	9	12	3	3	8
780	52843651	92.3077	37.7049	50	65	61	50	86.2069	97.2222	82.1429	0	50	50	71.4286	26.6667	40	2.22222	29	36	28	33	24	26	28	30	25	45
780	52843652	100	31.5789	46.1538	9	19	13	100	100	100	0	66.6667	40	100	0	66.6667	0	7	2	6	13	3	10	8	3	3	6
781	52887506	10	100	66.6667	10	4	9	0	100	100	100	50	80	100	100	NA	100	9	1	2	2	4	5	3	4	NA	2
781	52887507	37.1429	90	85	35	30	40	26.3158	50	90.9091	89.4737	77.2727	94.4444	76.4706	100	100	100	19	16	11	19	22	18	17	17	5	8
782	52921282	0	87.5	66.6667	11	16	12	0	0	100	75	40	85.7143	75	37.5	100	100	8	3	8	8	5	7	8	8	5	7
782	52921283	0	93.5484	72	21	31	25	0	0	87.5	100	58.8235	100	87.5	46.6667	100	100	13	8	16	15	17	8	16	15	7	11
783	53456660	28.5714	83.3333	29.4118	14	18	17	0	44.4444	88.8889	77.7778	62.5	0	11.1111	60	33.3333	50	5	9	9	9	8	9	9	10	3	6
783	53456661	14.2857	100	66.6667	7	4	9	0	33.3333	100	100	100	0	16.6667	60	0	100	4	3	3	1	6	3	6	5	3	1
784	53472384	6.66667	94.7368	86.6667	15	19	15	0	25	100	87.5	100	0	57.1429	100	75	100	11	4	11	8	13	2	7	9	4	7
784	53472385	7.69231	96.4286	62.1622	26	28	37	0	50	100	93.3333	92	0	35	100	46.6667	92.8571	22	4	13	15	25	12	20	18	15	14
785	53476803	19.2308	84.8485	35.7143	26	33	28	0	50	88.2353	81.25	76.9231	0	33.3333	78.5714	50	75	16	10	17	16	13	15	12	14	8	12
785	53476804	24.1379	85.7143	46.1538	29	21	26	0	41.1765	85.7143	85.7143	70.5882	0	50	93.3333	22.2222	71.4286	12	17	14	7	17	9	12	15	9	14
786	53487218	25	93.75	70	8	16	10	0	100	100	90	100	0	40	100	60	100	6	2	6	10	7	3	10	2	5	2
786	53487219	22.7273	89.2857	56.25	22	28	16	0	38.4615	93.3333	84.6154	100	0	80	100	28.5714	100	9	13	15	13	9	7	5	7	7	5
787	53496597	40	96	52.6316	15	25	19	0	85.7143	92.8571	100	100	0	50	84.6154	50	100	8	7	14	11	10	9	10	13	6	4
787	53496598	16.6667	95.4545	40.7407	30	22	27	0	29.4118	91.6667	100	91.6667	0	41.6667	100	50	100	13	17	12	10	12	15	12	2	4	6
788	53503933	0	100	60	13	29	35	0	NA	100	100	100	0	41.1765	66.6667	33.3333	100	13	NA	13	16	21	14	17	15	15	14
788	53503934	22.2222	100	45.4545	9	20	11	0	66.6667	100	100	100	0	66.6667	28.5714	33.3333	100	6	3	12	8	5	6	6	7	3	7
789	53516811	54.1667	100	55.5556	24	26	27	50	56.25	100	100	100	7.69231	100	100	100	100	8	16	14	12	14	13	11	9	10	13
789	53516812	0	100	71.4286	3	4	7	0	NA	100	100	100	60	100	100	100	100	3	NA	1	3	2	5	2	2	5	1
790	53578522	88	40	73.913	25	25	23	93.75	77.7778	7.14286	81.8182	63.6364	83.3333	100	91.6667	88.8889	78.5714	16	9	14	11	11	12	8	12	9	14
790	53578523	83.3333	35.4839	74.1935	36	31	31	85.1852	77.7778	0	100	40	90.4762	88.8889	83.3333	75	66.6667	27	9	20	11	10	21	9	24	8	15
791	53860655	60	6.66667	45.4545	5	15	22	0	100	0	14.2857	83.3333	0	0	57.8947	0	100	2	3	8	7	12	10	8	19	3	12
791	53860656	53.3333	6.66667	34.7826	15	15	23	0	100	14.2857	0	57.1429	0	0	37.5	0	94.4444	7	8	7	8	14	9	5	8	1	18
792	54041253	51.0638	0	50	47	36	48	40	59.2593	0	0	40.7407	61.9048	36.8421	50	66.6667	0	20	27	20	16	27	21	19	18	15	13
792	54041254	75	0	66.6667	4	8	9	100	50	0	0	66.6667	66.6667	66.6667	0	66.6667	0	2	2	3	5	3	6	3	1	3	3
793	54073528	76.1905	2.5641	68.0851	21	39	47	100	50	5.88235	0	96.1538	33.3333	57.1429	35.7143	85.7143	4.34783	11	10	17	22	26	21	14	14	7	23
793	54073612	83.3333	0	68.75	12	15	16	90	50	0	0	100	28.5714	55.5556	100	100	0	10	2	7	8	9	7	9	7	5	10
794	54095865	81.25	35.5556	69.4915	48	45	59	100	47.0588	100	0	100	48.5714	56	100	86.6667	46.6667	31	17	16	29	24	35	25	22	15	30
794	54095866	100	27.2727	80	6	11	15	100	NA	100	0	100	57.1429	57.1429	71.4286	100	42.8571	6	NA	3	8	8	7	7	7	3	7
795	54100006	88.2353	39.5833	80	17	48	35	93.3333	50	90.4762	0	100	63.1579	57.1429	72.7273	91.6667	50	15	2	21	27	16	19	21	11	12	16
795	54100007	92.3077	36.8421	70.9677	26	38	31	100	66.6667	93.3333	0	100	47.0588	25	93.75	100	43.75	20	6	15	23	14	17	16	16	11	16
796	54179910	93.75	50	73.913	16	28	23	100	50	0	87.5	50	100	0	15.3846	66.6667	100	14	2	12	16	12	11	18	13	9	4
796	54179911	97.7778	54.386	82.5397	45	57	63	97.2222	100	0	96.875	52.1739	100	0	61.1111	72.7273	94.4444	36	9	25	32	23	40	16	36	11	18
797	54184843	18.1818	100	52.381	11	20	21	0	100	100	100	100	0	87.5	100	55.5556	57.1429	9	2	7	13	11	10	8	12	9	14
797	54184844	23.0769	88.8889	46.6667	13	9	15	0	100	100	80	77.7778	0	100	100	60	75	10	3	4	5	9	6	7	4	5	4
798	54221231	41.1765	95.4545	72	17	22	25	53.8462	0	90	100	100	50	86.6667	94.4444	50	84.6154	13	4	10	12	11	14	15	18	6	13
798	54221232	25	89.4737	67.7419	24	38	31	54.5455	0	91.3043	86.6667	91.6667	52.6316	100	100	83.3333	85.7143	11	13	23	15	12	19	9	15	12	14
799	54273894	71.4286	23.8095	66.6667	21	21	24	73.3333	66.6667	0	62.5	69.2308	63.6364	0	50	58.3333	75	15	6	13	8	13	11	13	8	12	12
799	54273895	88.8889	33.3333	65.2174	18	21	23	90.9091	85.7143	0	87.5	84.6154	40	0	63.6364	73.3333	85.7143	11	7	13	8	13	10	9	11	15	14
800	54281290	100	42.3077	76.6667	23	26	30	100	100	91.6667	0	58.3333	88.8889	100	94.1176	77.7778	93.3333	19	4	12	14	12	18	9	17	9	15
800	54281291	94.2308	45.283	64.8148	52	53	54	100	86.9565	100	3.33333	51.5152	85.7143	92.3077	96.5517	75	95.6522	29	23	23	30	33	21	26	29	16	23
801	54362653	60.8696	0	45.7143	23	17	35	75	28.5714	0	0	61.1111	29.4118	0	0	0	0	16	7	8	9	18	17	14	13	6	13
801	54362654	60	0	41.6667	15	10	12	63.6364	50	0	0	50	33.3333	0	0	0	0	11	4	3	7	6	6	6	8	6	6
802	54362788	97.1429	0	47.2727	35	31	55	95.8333	100	0	0	50	45.1613	42.8571	0	0	0	24	11	17	14	24	31	21	25	16	19
802	54362789	96.1538	0	50	26	29	30	95.4545	100	0	0	37.5	54.5455	68.75	0	0	0	22	4	18	11	8	22	16	23	7	12
803	54454898	28.5714	100	83.3333	7	5	6	0	100	100	100	75	100	83.3333	50	100	100	5	2	3	2	4	2	6	2	1	1
803	54454899	30	92.8571	66.6667	20	28	21	0	85.7143	91.6667	93.75	100	41.6667	75	55.5556	100	18.1818	13	7	12	16	9	12	8	9	6	11
804	54455996	93.75	0	74.1935	16	18	31	100	50	0	0	64.2857	82.3529	0	85.7143	100	100	14	2	10	8	14	17	9	14	7	10
804	54455997	89.1304	0	39.2857	46	51	56	100	50	0	0	47.3684	35.1351	0	75.6757	93.75	85.7143	36	10	22	29	19	37	25	37	16	28
805	54461424	28	91.1765	79.1667	25	34	24	5.55556	85.7143	84.2105	100	86.6667	66.6667	91.6667	66.6667	100	61.1111	18	7	19	15	15	9	12	15	12	18
805	54461425	34.2857	94.1176	75	35	34	36	0	100	100	89.4737	91.6667	41.6667	94.1176	33.3333	94.4444	47.619	23	12	15	19	24	12	17	12	18	21
806	54461784	26.6667	95.2381	82.7586	30	21	29	0	88.8889	91.6667	100	100	58.3333	91.6667	42.8571	100	15.3846	21	9	12	9	17	12	12	14	3	13
806	54461785	38.4615	100	61.2903	26	27	31	0	100	100	100	100	25	77.7778	57.1429	85.7143	66.6667	16	10	12	15	15	16	9	14	7	9
807	54578872	51.8519	0	21.2121	27	39	33	55	42.8571	0	0	46.6667	0	71.4286	0	22.2222	47.8261	20	7	20	19	15	18	21	9	9	23
807	54578873	52.381	0	21.2121	21	31	33	44.4444	100	0	0	46.6667	0	20	44.4444	14.2857	47.3684	18	3	12	19	15	18	10	9	7	19
808	54755918	54.1667	96.1538	70.8333	24	26	24	61.9048	0	92.8571	100	100	46.1538	0	33.3333	77.7778	46.1538	21	3	14	12	11	13	16	9	9	13
808	54755919	42.8571	92.3077	65	21	26	20	52.9412	0	86.6667	100	100	50	0	60	0	50	17	4	15	11	6	14	15	10	9	18
809	54793795	48.3871	88.8889	72.7273	31	36	33	52.1739	37.5	90.4762	86.6667	94.1176	50	0	55	0	47.619	23	8	21	15	17	16	20	20	1	21
809	54793796	30.7692	100	57.8947	13	18	19	11.1111	75	100	100	85.7143	41.6667	0	30	30.7692	0	9	4	8	10	7	12	10	10	13	3
810	54842236	77.7778	35	57.1429	18	20	21	80	66.6667	87.5	0	66.6667	44.4444	83.3333	85.7143	66.6667	62.5	15	3	8	12	12	9	6	7	3	8
810	54842237	83.3333	35.1351	70.9677	30	37	31	88.4615	50	81.25	0	64.2857	76.4706	64.2857	86.6667	87.5	38.8889	26	4	16	21	14	17	14	15	16	18
811	54860191	37.5	91.6667	80.9524	8	12	21	16.6667	100	85.7143	100	57.1429	92.8571	85.7143	28.5714	NA	40	6	2	7	5	7	14	7	7	NA	10
811	54860192	48	92.3077	81.25	25	13	16	30.7692	66.6667	100	75	87.5	75	80	85.7143	100	57.1429	13	12	9	4	8	8	5	7	3	7
812	54915281	79.1667	30.7692	36.8421	48	13	19	100	65.5172	0	100	37.5	36.3636	28.5714	69.2308	50	50	19	29	9	4	8	11	7	13	6	4
812	54915282	75	11.1111	31.25	8	9	16	50	83.3333	0	50	37.5	25	25	100	33.3333	100	2	6	7	2	8	8	4	3	3	3
813	55055245	80	0	75	10	11	16	100	50	0	0	87.5	62.5	60	100	100	100	6	4	4	7	8	8	5	8	3	3
813	55055246	78.9474	0	52.1739	19	23	23	55.5556	100	0	0	61.5385	40	25	92.8571	75	85.7143	9	10	11	12	13	10	8	14	8	7
814	55148022	100	43.4783	96.875	17	23	32	100	100	100	0	94.7368	100	83.3333	100	77.7778	82.3529	16	1	10	13	19	13	6	12	9	17
814	55148023	88.8889	45.8333	81.8182	18	24	22	81.8182	100	90.9091	7.69231	87.5	78.5714	88.8889	88.2353	83.3333	90.9091	11	7	11	13	8	14	18	17	6	11
815	55229992	76.1905	0	66.6667	21	12	15	100	58.3333	0	0	100	37.5	83.3333	100	100	87.5	9	12	5	7	7	8	6	3	2	8
815	55229993	100	0	62.5	4	8	8	100	NA	0	0	100	25	80	NA	83.3333	83.3333	4	NA	6	2	4	4	5	NA	6	6
816	55234476	73.6842	0	54.5455	19	15	11	88.8889	60	0	0	100	37.5	100	50	100	88.8889	9	10	8	7	3	8	14	8	5	9
816	55234477	94.4444	0	53.8462	18	16	13	91.6667	100	0	0	100	25	100	33.3333	100	100	12	6	9	7	5	8	6	3	4	9
817	55477584	40	100	90	5	10	10	50	0	100	100	75	100	100	100	100	0	4	1	5	5	4	6	4	5	1	1
817	55477585	49.0566	97.3333	63.0435	53	75	92	50	48.2759	95.6522	100	32.5581	89.7959	100	90.3226	100	0	24	29	46	29	43	49	34	31	19	31
818	55492931	33.3333	100	62.5	18	25	32	42.8571	0	100	100	71.4286	55.5556	81.25	100	66.6667	0	14	4	11	14	14	18	16	8	12	12
818	55492932	36.3636	85.3659	37.8378	33	41	37	44.4444	0	88.8889	82.6087	52.6316	22.2222	69.2308	96.875	81.25	0	27	6	18	23	19	18	13	32	16	20
819	55605476	30.4348	96.9697	93.75	23	33	32	50	0	100	92.8571	100	84.6154	36.8421	47.3684	100	29.4118	14	9	19	14	19	13	19	19	10	17
819	55605477	23.8095	100	96	21	33	25	45.4545	0	100	100	100	92.3077	57.1429	54.5455	88.8889	81.8182	11	10	15	18	12	13	14	11	9	11
820	55672390	93.75	50	73.6842	16	24	19	90	100	100	0	54.5455	100	85.7143	90.9091	100	93.75	10	6	12	12	11	8	7	11	6	16
820	55672391	100	41.6667	84.6154	6	12	13	100	100	100	0	75	100	60	75	66.6667	90.9091	5	1	5	7	8	5	5	4	3	11
821	55688415	66.6667	0	50	18	15	16	100	45.4545	0	0	55.5556	42.8571	0	83.3333	50	100	7	11	9	6	9	7	12	6	8	1
821	55688416	50	0	27.5	30	47	40	63.6364	12.5	0	0	45	10	0	47.0588	54.5455	71.4286	22	8	25	22	20	20	22	17	11	21
822	55698108	40	100	95	15	12	20	46.1538	0	100	100	100	90.9091	100	100	35.7143	86.6667	13	2	7	5	9	11	12	8	14	15
822	55698109	50	94.7368	94.1176	24	19	17	52.6316	40	90.9091	100	100	90	100	100	66.6667	100	19	5	11	8	7	10	10	6	6	10
823	55844616	34.7826	96.1538	84.4444	23	26	45	42.1053	0	100	93.75	100	58.8235	73.6842	0	100	88.8889	19	4	10	16	28	17	19	12	10	18
823	55844617	25.7143	88.5714	78.2051	35	35	78	42.8571	0	85	93.3333	93.0233	60	92	0	79.1667	66.6667	21	14	20	15	43	35	25	21	24	24
824	55868081	20.9302	68.0851	44.898	43	47	49	34.7826	5	58.3333	78.2609	33.3333	56	39.1304	32	50	41.6667	23	20	24	23	24	25	23	25	16	24
824	55868082	16.6667	65	56.25	6	20	16	25	0	60	70	55.5556	57.1429	42.8571	50	75	50	4	2	10	10	9	7	7	8	4	8
825	56120460	19.1489	86.3636	58.7302	47	44	63	3.33333	47.0588	95.6522	76.1905	40	75.7576	28.5714	76.9231	47.0588	32.1429	30	17	23	21	30	33	14	26	17	28
825	56120461	3.33333	77.1429	62.2222	30	35	45	0	20	77.2727	76.9231	42.8571	79.1667	29.4118	85.7143	35.7143	47.8261	25	5	22	13	21	24	17	14	14	23
826	56129903	10.2564	93.3333	54.5455	39	15	22	0	20	100	83.3333	46.1538	66.6667	50	100	60	42.8571	19	20	9	6	13	9	4	5	5	7
826	56129904	12.5	84.6154	78.5714	16	13	14	0	50	100	75	62.5	100	100	100	50	46.6667	12	4	5	8	8	6	7	7	6	15
827	56168492	9.09091	89.2857	83.3333	33	28	36	0	42.8571	100	80	58.3333	95.8333	54.5455	88	35.7143	37.5	26	7	13	15	12	24	22	25	14	16
827	56168493	28.5714	86.3636	79.1667	14	22	24	12.5	50	92.3077	77.7778	55.5556	93.3333	33.3333	83.3333	50	25	8	6	13	9	9	15	9	6	4	8
828	56186448	41.3793	85.7143	71.875	29	35	32	35	55.5556	73.3333	95	57.1429	83.3333	91.6667	84.2105	66.6667	66.6667	20	9	15	20	14	18	24	19	6	9
828	56186449	36.1111	88.6792	81.0811	36	53	37	36.6667	33.3333	88.4615	88.8889	61.1111	100	80.9524	96	56.25	44.4444	30	6	26	27	18	19	21	25	16	27
829	56230695	100	58.3333	97.9592	35	48	49	100	100	0	100	100	96.5517	62.5	100	91.6667	96.4286	22	13	20	28	20	29	24	25	12	28
829	56230696	100	55.5556	96.4286	18	27	28	100	100	0	100	93.3333	100	62.5	91.6667	100	92.3077	14	4	12	15	15	13	8	12	4	13
830	56232947	41.6667	0	27.2727	12	21	22	44.4444	33.3333	0	0	46.1538	0	0	0	44.4444	38.4615	9	3	13	8	13	9	9	8	9	13
830	56232948	47.8261	0	27.907	23	30	43	55.5556	20	0	0	44.4444	0	0	0	37.5	11.1111	18	5	16	14	27	16	13	16	8	9
831	56303459	51.4286	94.1176	89.1892	35	34	37	43.3333	100	100	88.8889	87.5	90.4762	62.069	78.5714	90.9091	66.6667	30	5	16	18	16	21	29	14	11	15
831	56303460	37.931	97.0588	88.5714	29	34	35	29.1667	80	94.1176	100	95.2381	78.5714	38.4615	73.6842	77.7778	81.8182	24	5	17	17	21	14	13	19	9	22
832	56396486	0	50	9.09091	10	18	22	0	NA	0	75	20	0	33.3333	50	0	0	10	NA	6	12	10	12	12	4	2	11
832	56396487	0	52.6316	14.2857	13	19	14	0	0	0	100	28.5714	0	75	90	0	0	11	2	9	10	7	7	8	10	6	12
833	56420593	0	57.1429	20	16	14	10	0	0	0	100	33.3333	0	50	80	0	0	14	2	6	8	6	4	4	5	7	5
833	56420594	0	63.6364	21.6667	42	33	60	0	0	0	95.4545	41.9355	0	54.5455	100	0	2.94118	28	14	11	22	31	29	22	15	11	34
834	56434741	0	100	33.3333	7	4	9	0	0	NA	100	100	0	60	50	0	0	4	3	NA	4	3	6	5	6	1	2
834	56434742	0	42.8571	32.1429	31	21	28	0	0	0	90	60	0	57.1429	55.5556	0	0	17	14	11	10	15	13	7	9	14	18
835	56442734	2	54.2857	21.1538	50	35	52	4.16667	0	0	100	50	0	38.4615	76.9231	0	0	24	26	16	19	22	30	26	13	15	25
835	56442735	0	58.3333	20	5	12	10	0	NA	16.6667	100	40	0	50	83.3333	0	0	5	NA	6	6	5	5	6	6	3	5
836	56444439	0	50	36.3636	6	10	11	0	0	0	100	57.1429	0	0	100	0	0	5	1	5	5	7	4	5	8	1	4
836	56444440	0	57.1429	15.7895	22	14	19	0	0	0	100	33.3333	0	44.4444	83.3333	0	9.09091	8	14	6	8	9	10	9	6	7	11
837	56461999	4	50	34.375	25	26	32	0	9.09091	0	100	55	0	56.25	95.4545	0	0	14	11	13	13	20	12	16	22	5	18
837	56462000	0	48.4848	7.40741	26	33	27	0	0	0	88.8889	20	0	14.2857	94.1176	0	0	13	13	15	18	10	17	7	17	8	15
838	56844164	41.6667	0	5.26316	12	19	19	0	71.4286	0	0	14.2857	0	0	100	0	0	5	7	7	12	7	12	11	10	5	6
838	56844165	46.1538	0	23.0769	13	8	13	0	85.7143	0	0	75	0	0	100	0	0	6	7	6	2	4	9	5	7	4	6
839	56849495	100	43.75	58	51	64	50	100	100	100	0	50	65.3846	41.1765	46.4286	0	32.1429	38	13	28	36	24	26	34	28	23	28
839	56849496	91.6667	26.3158	45	24	19	20	92.8571	90	100	0	46.1538	42.8571	12.5	71.4286	0	37.5	14	10	5	14	13	7	8	7	5	8
840	56864618	100	41.3793	60.7143	26	29	28	100	100	100	0	62.5	58.3333	46.1538	100	0	35.2941	16	10	12	17	16	12	13	9	10	17
840	56864619	94.7368	33.3333	71.4286	19	6	14	93.75	100	100	0	75	70	50	100	0	57.1429	16	3	2	4	4	10	4	4	6	7
841	56893849	10	55.5556	38.8889	10	18	18	12.5	0	14.2857	81.8182	62.5	20	77.7778	50	66.6667	33.3333	8	2	7	11	8	10	9	6	3	6
841	56893850	24.3243	75	51.1111	37	40	45	28	16.6667	41.1765	100	55	48	100	86.9565	95	81.8182	25	12	17	23	20	25	25	23	20	11
842	56925894	93.75	47.3684	82.3529	16	19	17	92.3077	100	100	0	100	50	50	25	66.6667	75	13	3	9	10	11	6	8	4	6	4
842	56925895	83.3333	42.8571	75	6	7	12	83.3333	NA	75	0	57.1429	100	0	50	NA	70	6	NA	4	3	7	5	1	4	NA	10
843	56926175	62.5	0	53.8462	8	20	26	100	0	0	0	0	100	50	0	9.09091	14.2857	5	3	9	11	12	14	6	6	11	7
843	56926176	93.3333	0	38.4615	15	17	13	93.3333	NA	0	0	0	83.3333	25	0	0	11.1111	15	NA	10	7	7	6	4	5	6	9
844	56983942	95	50	75	20	12	28	94.4444	100	0	85.7143	50	93.75	38.4615	53.8462	100	100	18	2	5	7	12	16	13	13	6	8
[truncated: 1,471 more rows]

## Sheet: TS3_DMRs, lung-based
Supplementary Table S3: Differentially methylated regions identified in lung-based analysis (n=8), sorted by number differentially methylated sites contained. One discordant methylation locus was allowed per DMR. Acdmpv.lu1 sample is hemizygous for the paternal allele for all DMRs; acdmpv.lu2 is dizygous. Shading of percent methylation values ranges from low in purple, to high in yellow.
DMR	pos	acdmpv.lu1.percMeth	acdmpv.lu2.percMeth	control.lu.percMeth	acdmpv.lu1.coverage	acdmpv.lu2.coverage	control.lu.coverage	matUPD.bl1.percMeth	matUPD.bl2.percMeth	patUPD.bl1.percMeth	patUPD.bl2.percMeth	control.bl1.percMeth	control.bl2.percMeth	matUPD.fi.percMeth	matUPD.bl1.coverage	matUPD.bl2.coverage	patUPD.bl1.coverage	patUPD.bl2.coverage	control.bl1.coverage	control.bl2.coverage	matUPD.fi.coverage
1	85029400	14.2857	81.8182	100	7	11	18	94.1176	80	80	93.75	80	90	90.9091	17	5	10	16	20	20	22
1	85029421	33.3333	55.5556	85.7143	12	9	7	93.3333	75	100	77.7778	41.6667	80	100	15	8	13	18	12	15	11
1	85029422	33.3333	75	90	9	12	20	89.4737	75	78.5714	100	85.7143	80.9524	95.6522	19	8	14	24	21	21	23
1	85029568	0	57.1429	80	3	7	10	81.8182	100	100	90	66.6667	71.4286	100	11	7	13	10	12	7	4
1	85029569	33.3333	78.5714	92.3077	9	14	13	78.5714	100	73.6842	92.8571	84.2105	80.9524	100	14	11	19	28	19	21	19
1	85029609	25	66.6667	100	4	9	11	100	90	100	100	88.8889	100	100	11	10	12	12	9	9	6
1	85029610	37.5	80	100	8	10	10	100	80	100	95.4545	92.3077	75	85.7143	11	5	9	22	13	12	14
1	85029664	0	100	71.4286	7	7	7	100	90.9091	91.6667	100	83.3333	100	83.3333	13	11	12	11	6	8	6
1	85029665	0	100	55.5556	6	6	9	100	100	100	88.8889	75	85.7143	100	9	8	10	9	8	14	12
2	85123818	0	66.6667	75	2	6	12	100	100	81.8182	80	83.3333	75	57.1429	13	1	11	5	6	12	7
2	85123819	15.3846	46.1538	61.1111	13	13	18	92.5926	100	100	90.9091	84.6154	77.7778	46.4286	27	7	17	22	26	18	28
2	85123828	0	50	75	2	6	8	100	NA	71.4286	80	83.3333	84.6154	87.5	13	NA	7	5	6	13	8
2	85123829	21.4286	46.1538	61.9048	14	13	21	83.3333	100	100	77.2727	82.7586	77.2727	51.7241	30	7	17	22	29	22	29
2	85123859	33.3333	66.6667	85.7143	3	6	7	100	NA	83.3333	100	100	100	80	11	NA	6	7	5	12	5
2	85123860	31.25	52.9412	59.2593	16	17	27	93.1034	100	100	100	96.7742	96	80	29	8	19	23	31	25	35
3	86220034	81.8182	50	42.8571	11	8	14	94.7368	87.5	100	100	100	86.6667	71.4286	19	8	10	14	19	15	14
3	86220035	100	62.5	28.5714	5	16	14	100	100	90.9091	100	91.6667	100	80	16	7	11	16	12	13	5
3	86220038	81.8182	50	42.8571	11	8	14	100	87.5	100	100	100	93.3333	78.5714	20	8	9	13	22	15	14
3	86220039	100	62.5	42.8571	4	16	14	92.8571	100	100	100	91.6667	100	60	14	6	12	15	12	13	5
3	86220048	84.6154	50	60	13	10	15	95.4545	100	100	100	95.6522	86.6667	85.7143	22	9	10	14	23	15	14
3	86220049	100	72.2222	25	5	18	12	91.6667	83.3333	92.8571	100	100	100	100	12	6	14	15	12	13	3
4	83747947	42.8571	90	100	7	10	11	100	90.9091	100	100	100	90.9091	90	15	11	10	10	10	11	10
4	83747948	33.3333	87.5	88.8889	3	8	9	100	100	100	100	100	100	100	10	1	5	6	13	9	8
4	83747953	37.5	83.3333	100	8	12	13	100	100	100	100	90	100	66.6667	14	10	11	10	10	12	9
4	83747954	33.3333	87.5	80	3	8	10	100	100	100	100	100	83.3333	100	10	2	5	7	13	12	8
4	83748015	50	80.9524	100	14	21	23	96.6667	100	95.8333	100	95.4545	96	92.3077	30	10	24	18	22	25	13
5	84271849	22.2222	85.7143	76.1905	9	14	21	90.4762	80	76.9231	100	71.4286	95.6522	92.8571	21	5	13	13	14	23	14
5	84271859	50	75	80	6	8	10	93.5484	100	100	93.75	95.6522	94.4444	75	31	7	14	16	23	18	20
5	84271860	10	80	86.3636	10	15	22	95.2381	50	100	92.8571	100	95.2381	75	21	2	17	14	13	21	20
5	84271907	33.3333	63.6364	81.8182	6	11	11	96.1538	87.5	100	94.4444	94.1176	88.2353	94.4444	26	8	11	18	17	17	18
5	84271908	33.3333	75	89.4737	12	16	19	85.7143	100	81.25	90	90	86.9565	94.7368	21	5	16	10	10	23	19
6	84958830	100	33.3333	40	7	12	15	35.2941	25	42.1053	63.6364	14.2857	31.5789	18.1818	17	4	19	11	7	19	11
6	84958838	100	62.5	66.6667	8	8	3	81.8182	66.6667	77.7778	16.6667	54.5455	42.8571	64.2857	11	3	9	6	11	7	14
6	84958839	85.7143	50	61.1111	7	14	18	58.8235	0	55.5556	62.5	28.5714	52.381	55.5556	17	3	18	8	7	21	9
6	84958850	62.5	11.1111	0	8	9	2	44.4444	0	25	0	16.6667	14.2857	7.69231	9	3	8	6	12	7	13
6	84958851	83.3333	50	42.1053	6	16	19	14.2857	0	26.3158	12.5	33.3333	16	45.4545	14	3	19	8	6	25	11
7	85263882	0	20	20	7	15	15	58.3333	100	100	100	71.4286	84.2105	100	12	3	12	12	7	19	11
7	85263883	0	55.5556	36.3636	7	9	11	30.7692	66.6667	95	93.3333	100	92.3077	70.5882	13	9	20	15	14	13	17
7	85263994	0	75	57.1429	2	4	7	100	NA	100	100	80	80	100	7	NA	6	8	5	5	5
7	85263995	50	88.8889	76.9231	8	9	13	84.2105	87.5	92.8571	93.3333	94.1176	94.1176	92.3077	19	8	14	15	17	17	13
7	85264017	0	50	25	2	2	4	83.3333	NA	100	100	75	66.6667	100	6	NA	3	6	4	3	6
8	85617455	80	22.2222	57.1429	5	9	7	83.3333	100	57.1429	60	85.7143	90	100	12	1	7	5	7	10	8
8	85617458	80	33.3333	28.5714	5	9	7	91.6667	100	71.4286	100	100	90.9091	100	12	1	7	5	6	11	8
8	85617543	66.6667	14.2857	27.7778	9	7	18	53.3333	75	85.7143	50	75	58.3333	70	15	4	7	4	8	12	10
8	85617544	75	50	0	8	6	5	88.8889	100	83.3333	92.3077	71.4286	57.1429	72.7273	9	4	6	13	7	7	11
8	85617560	62.5	25	29.4118	8	4	17	81.25	75	100	50	100	66.6667	50	16	4	5	4	11	9	8
